# Supplementary material for: Construction of highly enantioenriched spirocyclopentaneoxindoles containing four consecutive stereocenters via thiourea-catalyzed asymmetric Michael–Henry cascade reactions
Source: publisher site journal article supplement (doi:10.3762/bjoc.13.131), 2017-07-07
Supplement: Additional file 1 [file 1860-5397-13-131-S1.pdf]

**Supporting Information**  
**for**  
**Construction of highly enantioenriched**  
**spirocyclopentaneoxindoles containing four**  
**consecutive stereocenters via thiourea- catalyzed**  
**asymmetric Michael–Henry cascade reactions**

Yonglei Du<sup>1</sup>, Jian Li<sup>2</sup>, Kerong Chen<sup>2</sup>, Chenglin Wu<sup>2</sup>, Yu Zhou\*<sup>2</sup> and Hong Liu\*<sup>2,3</sup>

Address: <sup>1</sup>Nano Science and Technology Institute, University of Science and Technology of China, 166 Ren Ai Road, Suzhou 215123, China, <sup>2</sup>CAS Key Laboratory of Receptor Research, Shanghai Institute of Materia Medica, Chinese Academy of Sciences, 555, Zu Chong Zhi Road, Shanghai 201203, China and <sup>3</sup>University of Chinese Academy of Sciences, NO.19A Yuquan Road, Beijing 100049, China

Email: Hong Liu\* - hliu@simm.ac.cn

\* Corresponding author

**General information, experimental details, characterization data and**  
**copies of <sup>1</sup>H and <sup>13</sup>C NMR spectra, and HPLC experimental data**

**Table of contents**

|                                                                                         |         |
|-----------------------------------------------------------------------------------------|---------|
| (A) General procedures for the synthesis of substrates and products.....                | S1–S17  |
| (B) <sup>1</sup> H NMR and <sup>13</sup> C NMR spectra for substrates and products..... | S18–S41 |
| (C) HPLC spectra.....                                                                   | S42–S56 |
| (D) X-ray data.....                                                                     | S57     |

## General information

The reagents were purchased from commercial suppliers and used without further purification. Analytical thin-layer chromatography (TLC) was performed on HSGF 254 (0.15–0.2 mm thickness), visualized by irradiation with UV light (254 nm). Column chromatography was performed using silica gel FCP 300–400. Melting points were measured with a micro melting point apparatus.  $^1\text{H}$  and  $^{13}\text{C}$  NMR spectra were recorded on a 400 MHz, 500 MHz or 600 MHz instrument (TMS as internal standard). Chemical shifts were reported in parts per million (ppm,  $\delta$ ) downfield from tetramethylsilane. Proton coupling patterns were described as singlet (s), doublet (d), triplet (t), multiplet (m), doublet of doublets (dd) and broad (br), triplet of doublets (td). Low- and high-resolution mass spectra (LRMS and HRMS) were measured on spectrometer (Micromass Ultra Q-TOF). Yields refer to pure compounds, unless otherwise indicated.

### (A) General procedures for the synthesis of substrates and products.

#### Procedure for the preparation of (Z)-2a

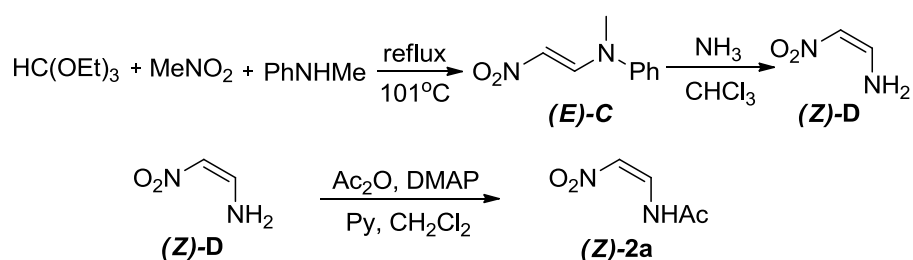

A solution of nitromethane (0.5 mol), triethyl orthoformate (0.2 mol), TsOH (0.7 g) and *N*-methylaniline (0.15 mol) was heated at 101 °C for 7 h. Then the solvent was removed by evaporation, the residue was purified by recrystallization from

toluene/petrolether to give the product (*E*)-*N*-methyl-*N*-(2-nitrovinyl) aniline **C** (18.7 g , 70%). Compound **C** was dissolved in chloroform, then resultant solution was saturated with ammonia and the mixture was kept in a refrigerator overnight. After the removal of solvent, the residue was recrystallized from chloroform to give (*Z*)-2-nitroethenamine **D** (8.3 g, 90%). To a stirred solution of (*Z*)-2-nitroethenamine **D** (4.20 g, 47.69 mmol) and DMAP (1.16 g, 9.53 mmol) in 190 mL of CH<sub>2</sub>Cl<sub>2</sub>, the pyridine (15.4 mL, 4.0 equiv, 191 mmol) and Ac<sub>2</sub>O (8.90 mL, 95.4 mmol) were added at 0 °C. The reaction was allowed to continue at ambient temperature for 5 hours, then 1 mol/L HCl was added and the reaction mixture was extracted with CH<sub>2</sub>Cl<sub>2</sub>. The organic extracts were washed with saturated aqueous NaHCO<sub>3</sub> solution, dried over Na<sub>2</sub>SO<sub>4</sub> and concentrated to give nitrovinylacetamide **2a** (5.59 g, 90%) [1] as light yellow solid. Further purification can be achieved by recrystallization from CH<sub>2</sub>Cl<sub>2</sub>.

***N*-(2-Nitrovinyl)acetamide (2a):** <sup>1</sup>H NMR (400 MHz, CDCl<sub>3</sub>) δ 10.40 (br s, 1H), 7.59 (dd, *J* = 12.0, 6.9 Hz, 1H), 6.60 (d, *J* = 6.9 Hz, 1H), 2.28 (s, 3H). EI-MS *m/z* 131 [M+H<sup>+</sup>]; HRMS (ESI) calcd for C<sub>4</sub>H<sub>6</sub>N<sub>2</sub>O<sub>3</sub> [M]<sup>+</sup>:129.0306, found: 129.0306.

**(*Z*)-*N*-Methyl-2-nitroethenamine (2b):** Compound **2b** was purchased from commercial suppliers and used without further purification. <sup>1</sup>H NMR (400 MHz, CDCl<sub>3</sub>) δ 9.01 (s, 1H), 6.72 (dd, *J* = 13.9, 5.7 Hz, 1H), 6.46 (d, *J* = 5.7 Hz, 1H), 3.17 (d, *J* = 5.2 Hz, 3H). EI-MS *m/z* 103 [M+H<sup>+</sup>]; HRMS (ESI) calcd for C<sub>3</sub>H<sub>6</sub>N<sub>2</sub>O<sub>2</sub> [M+H<sup>+</sup>]:103.0502, found: 103.0499.

**(*Z*)-*tert*-Butyl-(2-nitrovinyl)carbamate (2c):** Compound **2c** was purchased from commercial suppliers and used without further purification. <sup>1</sup>H NMR (400 MHz,

CDCl<sub>3</sub>)  $\delta$  9.71 (s, 1H), 7.36 (dd,  $J$  = 12.5, 6.8 Hz, 1H), 6.56 (d,  $J$  = 6.8 Hz, 1H), 1.54 (s, 9H). EI-MS  $m/z$  189 [ $M+H^+$ ]; HRMS (ESI) calcd for C<sub>7</sub>H<sub>12</sub>N<sub>2</sub>O<sub>4</sub> [ $M$ ]<sup>+</sup>:187.0724, found: 187.0721.

### Procedure for the preparation of 1a-j

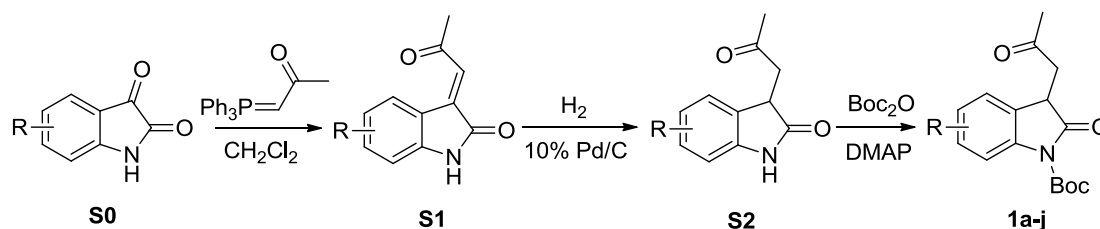

To a stirred solution of **S0** (10 mmol) in CH<sub>2</sub>Cl<sub>2</sub> (180 mL) was added slowly triphenylphosphoranylidene-2-propanon (11 mmol, 1.1 equiv) in CH<sub>2</sub>Cl<sub>2</sub> (20 mL) at room temperature, and the resulting mixture was stirred at the same temperature for 8 hours. Then the mixture was concentrated under reduced pressure, and the crude product was purified by column chromatography on silica gel to afford the desired product **S1** (yield, 90%). Compound **S1** (2 mmol) was dissolved in 50 mL methanol and was allowed to react in the presence of Pd/C (0.2 mmol, 0.1 equiv; 10% loading in 50% water) under a hydrogen atmosphere for 1 hour. After the reaction was completed, the reaction liquid was filtrated through celite and evaporated to give a residue, which was purified via flash chromatography on silica gel using petroleum/EtOAc (4:1 to 2:1) to afford the desired product **S2** as a light yellow oil (yield, 80%). The di-*tert*-butyl-dicarbonate (1.1 mmol, 1.1equiv) in 5 mL of CH<sub>2</sub>Cl<sub>2</sub> was added slowly to a solution of 3-substituted indoline **S2** (1.0 mmol ) in CH<sub>2</sub>Cl<sub>2</sub> (30 mL) in the presence of DMAP (0.1 mmol, 0.1 equiv) at −40 °C. The reaction was allowed to continue overnight at −40 °C. After the reaction was completed, the

aqueous sat.  $\text{NH}_4\text{Cl}$  was added and the reaction mixture was extracted with  $\text{CH}_2\text{Cl}_2$ . The crude product was purified by flash chromatography on silica gel using petroleum/EtOAc (6:1 to 4:1) to afford desired product **1a–j** as colourless liquid, which solidified over time [2].

**1-tert-Butyloxycarbonyl-3-(2-oxopropyl)indolin-2-one (1a):** This compound is known [2], colourless liquid, 59% yield;  $^1\text{H}$  NMR (500 MHz,  $\text{CDCl}_3$ )  $\delta$  7.81 (d,  $J$  = 8.2 Hz, 1H), 7.31 – 7.27 (m, 1H), 7.15 (d,  $J$  = 7.4 Hz, 1H), 7.09 (t,  $J$  = 7.5 Hz, 1H), 3.95 (dd,  $J$  = 7.7, 3.3 Hz, 1H), 3.26 (dd,  $J$  = 18.5, 3.5 Hz, 1H), 2.97 (dd,  $J$  = 18.5, 7.9 Hz, 1H), 2.20 (s, 3H), 1.64 (s, 9H). EI-MS  $m/z$  312 [ $\text{M}+\text{Na}^+$ ]; HRMS (ESI) calcd for  $\text{C}_{16}\text{H}_{19}\text{NO}_4\text{Na}$  [ $\text{M}+\text{Na}^+$ ]: 312.1212; observed: 312.1203.

**1-tert-Butyloxycarbonyl-5-methyl-3-(2-oxopropyl)indolin-2-one (1b):** This compound is known [2], colourless liquid, 58% yield;  $^1\text{H}$  NMR (600 MHz,  $\text{CDCl}_3$ )  $\delta$  7.68 (d,  $J$  = 8.3 Hz, 1H), 7.08 (d,  $J$  = 8.3 Hz, 1H), 6.97 (s, 1H), 3.94 (dd,  $J$  = 8.0, 3.4 Hz, 1H), 3.25 (dd,  $J$  = 18.5, 3.4 Hz, 1H), 2.94 (dd,  $J$  = 18.4, 8.1 Hz, 1H), 2.30 (s, 3H), 2.22 (s, 3H), 1.63 (s, 9H). EI-MS  $m/z$  304 [ $\text{M}+\text{H}^+$ ]; HRMS (ESI) calcd for  $\text{C}_{17}\text{H}_{21}\text{NO}_4$  [ $\text{M}+\text{H}^+$ ]: 304.1543; observed: 304.1533.

**1-tert-Butyloxycarbonyl-5,7-dimethyl-3-(2-oxopropyl)indolin-2-one (1c):** colourless liquid, 50% yield;  $^1\text{H}$  NMR (500 MHz,  $\text{CDCl}_3$ )  $\delta$  6.88 (s, 1H), 6.80 (s, 1H), 3.94 (dd,  $J$  = 7.9, 3.5 Hz, 1H), 3.21 (dd,  $J$  = 18.4, 3.6 Hz, 1H), 2.92 (dd,  $J$  = 18.4, 8.0 Hz, 1H), 2.26 (s, 3H), 2.20 (s, 3H), 2.19 (s, 3H), 1.61 (s, 9H). EI-MS  $m/z$  340 [ $\text{M}+\text{Na}^+$ ]; HRMS (ESI) calcd for  $\text{C}_{18}\text{H}_{23}\text{NO}_4\text{Na}$  [ $\text{M}+\text{Na}^+$ ]: 340.1512; observed: 340.1517.

**1-*tert*-Butyloxycarbonyl-5-methoxy-3-(2-oxopropyl)indolin-2-one (1d):** This compound is known [2], colourless liquid, 62% yield;  $^1\text{H}$  NMR (500 MHz,  $\text{CDCl}_3$ )  $\delta$  7.72 (d,  $J = 8.9$  Hz, 1H), 6.79 (dd,  $J = 8.9, 2.5$  Hz, 1H), 6.74 (d,  $J = 1.7$  Hz, 1H), 3.93 (dd,  $J = 7.9, 3.4$  Hz, 1H), 3.76 (s, 3H), 3.25 (dd,  $J = 18.5, 3.5$  Hz, 1H), 2.95 (dd,  $J = 18.5, 8.0$  Hz, 1H), 2.20 (s, 3H), 1.62 (s, 9H). EI-MS  $m/z$  342  $[\text{M}+\text{Na}^+]$ ; HRMS (ESI) calcd for  $\text{C}_{17}\text{H}_{21}\text{NO}_5\text{Na}$   $[\text{M}+\text{Na}^+]$ : 342.1317; observed: 342.1320.

**1-*tert*-Butyloxycarbonyl-5-trifluoromethoxy-3-(2-oxopropyl)indolin-2-one (1e):** colourless liquid, 52% yield;  $^1\text{H}$  NMR (500 MHz, DMSO)  $\delta$  7.81 (d,  $J = 8.9$  Hz, 1H), 7.36 (s, 1H), 7.31 (dd,  $J = 8.9, 0.8$  Hz, 1H), 3.97 (t,  $J = 4.7$  Hz, 1H), 3.53 (dd,  $J = 18.9, 4.1$  Hz, 1H), 3.24 (dd,  $J = 19.0, 5.5$  Hz, 1H), 2.10 (s, 3H), 1.58 (s, 9H). EI-MS  $m/z$  372  $[\text{M}]^-$ ; HRMS (ESI) calcd for  $\text{C}_{17}\text{H}_{18}\text{F}_3\text{NO}_5$   $[\text{M}]^-$ : 372.1064; observed: 372.1059.

**1-*tert*-Butyloxycarbonyl-5-fluoro-3-(2-oxopropyl)indolin-2-one (1f):** colourless liquid, 56% yield;  $^1\text{H}$  NMR (400 MHz,  $\text{CDCl}_3$ )  $\delta$  7.80 (dd,  $J = 8.9, 4.6$  Hz, 1H), 6.98 (td,  $J = 9.0, 2.6$  Hz, 1H), 6.94 – 6.89 (m, 1H), 3.93 (dd,  $J = 8.1, 2.7$  Hz, 1H), 3.28 (dd,  $J = 18.6, 3.3$  Hz, 1H), 2.98 (dd,  $J = 18.6, 8.0$  Hz, 1H), 2.22 (s, 3H), 1.63 (s, 9H). EI-MS  $m/z$  330  $[\text{M}+\text{Na}^+]$ ; HRMS (ESI) calcd for  $\text{C}_{16}\text{H}_{18}\text{FNO}_4\text{Na}$   $[\text{M}+\text{Na}^+]$ : 330.1118; observed: 330.1124.

**1-*tert*-Butyloxycarbonyl-5-chloro-3-(2-oxopropyl)indolin-2-one (1g):** colourless liquid, 65% yield;  $^1\text{H}$  NMR (400 MHz,  $\text{CDCl}_3$ )  $\delta$  7.76 (d,  $J = 8.7$  Hz, 1H), 7.26 – 7.22 (m, 1H), 7.14 (d,  $J = 0.7$  Hz, 1H), 3.89 (dd,  $J = 7.6, 3.0$  Hz, 1H), 3.26 (dd,  $J = 18.7, 3.3$  Hz, 1H), 2.99 (dd,  $J = 18.7, 7.8$  Hz, 1H), 2.20 (s, 3H), 1.62 (s, 9H).

EI-MS  $m/z$  346  $[M+Na^+]$ ; HRMS (ESI) calcd for  $C_{16}H_{18}ClNO_4Na$   $[M+Na^+]$ : 346.0822; observed: 346.0828.

**1-*tert*-Butyloxycarbonyl-7-fluoro-3-(2-oxopropyl)indolin-2-one (1h):**

colourless liquid, 75% yield;  $^1H$  NMR (400 MHz,  $CDCl_3$ )  $\delta$  7.89 (s, 1H), 7.08 (d,  $J$  = 0.9 Hz, 2H), 3.89 (dd,  $J$  = 7.8, 3.4 Hz, 1H), 3.26 (dd,  $J$  = 18.5, 3.4 Hz, 1H), 2.98 (dd,  $J$  = 18.5, 7.9 Hz, 1H), 2.20 (s, 3H), 1.64 (s, 9H). EI-MS  $m/z$  330  $[M+Na^+]$ ; HRMS (ESI) calcd for  $C_{16}H_{18}FNO_4Na$   $[M+Na^+]$ : 330.1118; observed: 330.1122.

**1-*tert*-Butyloxycarbonyl-6-chloro-3-(2-oxopropyl)indolin-2-one (1i):** This

compound is known [2], colourless liquid, 50% yield;  $^1H$  NMR (400 MHz,  $CDCl_3$ )  $\delta$  7.11 – 7.01 (m, 2H), 7.00 – 6.92 (m, 1H), 3.99 (dd,  $J$  = 8.0, 3.3 Hz, 1H), 3.29 (dd,  $J$  = 18.6, 3.3 Hz, 1H), 3.00 (dd,  $J$  = 18.6, 8.0 Hz, 1H), 2.21 (s, 3H), 1.61 (s, 9H). EI-MS  $m/z$  346  $[M+Na^+]$ ; HRMS (ESI) calcd for  $C_{16}H_{18}ClNO_4Na$   $[M+Na^+]$ : 346.0822; observed: 346.0822.

**1-*tert*-Butyloxycarbonyl-6-bromo-3-(2-oxopropyl)indolin-2-one (1j):**

colourless liquid, 51% yield;  $^1H$  NMR (400 MHz, DMSO)  $\delta$  7.89 (d,  $J$  = 1.5 Hz, 1H), 7.33 (dd,  $J$  = 7.9, 1.6 Hz, 1H), 7.22 (d,  $J$  = 8.0 Hz, 1H), 3.86 (t,  $J$  = 4.6 Hz, 1H), 3.45 (dd,  $J$  = 18.8, 3.8 Hz, 1H), 3.20 (dd,  $J$  = 19.0, 5.7 Hz, 1H), 2.08 (s, 3H), 1.56 (s, 9H). EI-MS ( $m/z$ ): 392, 390  $[M+Na^+, (Br^{81}), (Br^{79})]$ . HRMS (ESI) calcd for  $C_{16}H_{18}BrNO_4$   $[M]^+$ : 366.0346; observed: 366.0345.

## Procedure for the preparation of 1k-o

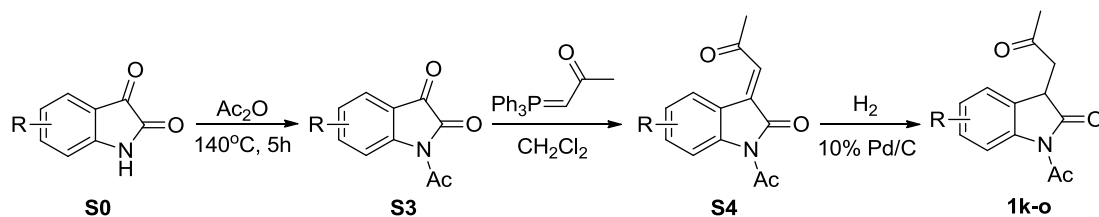

Isatin-derivative **S0** (10 mmol) was dissolved in Ac<sub>2</sub>O (50 mL) at 140 °C for 5 h.

After the reaction was completed, the reaction was cooled, the precipitated solid was filtered off, washed with petroleum and recrystallized from CH<sub>2</sub>Cl<sub>2</sub> to give purer product **S3**. Compound **S3** to **1k-o**, the same as Compound **S1** to **1a-j**.

**1-Acetyl-3-(2-oxopropyl)indolin-2-one (1k)**: white solid, 50% yield; <sup>1</sup>H NMR (400 MHz, DMSO) δ 8.10 – 8.04 (m, 1H), 7.32 – 7.24 (m, 2H), 7.19 – 7.10 (m, 1H), 3.97 (t, *J* = 4.8 Hz, 1H), 3.46 (dd, *J* = 18.8, 4.0 Hz, 1H), 3.22 (dd, *J* = 18.8, 5.8 Hz, 1H), 2.55 (s, 3H), 2.10 (s, 3H). EI-MS *m/z* 230 [M]<sup>+</sup>; HRMS (ESI) calcd for C<sub>13</sub>H<sub>13</sub>NO<sub>3</sub> [M]<sup>+</sup>: 230.0823; observed: 230.0824.

**1-Acetyl-5-methyl-3-(2-oxopropyl)indolin-2-one (1l)**: white solid, 54% yield; <sup>1</sup>H NMR (400 MHz, DMSO) δ 7.96 (d, *J* = 8.1 Hz, 1H), 7.12 – 7.05 (m, 2H), 3.94 (t, *J* = 4.8 Hz, 1H), 3.44 (dd, *J* = 18.9, 3.9 Hz, 1H), 3.21 (dd, *J* = 18.8, 5.8 Hz, 1H), 2.54 (s, 3H), 2.27 (s, 3H), 2.11 (s, 3H). EI-MS *m/z* 244 [M]<sup>+</sup>; HRMS (ESI) calcd for C<sub>14</sub>H<sub>15</sub>NO<sub>3</sub> [M]<sup>+</sup>: 244.0979; observed: 244.0978.

**1-Acetyl-5-methoxy-3-(2-oxopropyl)indolin-2-one (1m)**: white solid, 57% yield; <sup>1</sup>H NMR (400 MHz, DMSO) δ 7.99 (d, *J* = 8.9 Hz, 1H), 6.93 (dd, *J* = 2.6, 1.1 Hz, 1H), 6.83 (dd, *J* = 8.9, 2.3 Hz, 1H), 3.95 (t, *J* = 4.8 Hz, 1H), 3.73 (s, 3H), 3.48 (dd, *J* = 18.8, 4.0 Hz, 1H), 3.23 (dd, *J* = 18.8, 5.6 Hz, 1H), 2.53 (s, 3H), 2.10 (s, 3H). EI-MS *m/z*



260 [M]<sup>-</sup>; HRMS (ESI) calcd for C<sub>14</sub>H<sub>15</sub>NO<sub>4</sub> [M]<sup>-</sup>: 260.0928; observed: 260.0926.

**1-Acetyl-5-fluoro-3-(2-oxopropyl)indolin-2-one (1n):** white solid, 53% yield; <sup>1</sup>H NMR (400 MHz, DMSO) δ 8.08 (dd, *J* = 8.9, 4.9 Hz, 1H), 7.22 (dd, *J* = 8.4, 1.7 Hz, 1H), 7.12 (td, *J* = 9.3, 2.8 Hz, 1H), 4.00 (t, *J* = 4.3 Hz, 1H), 3.52 (dd, *J* = 19.0, 3.9 Hz, 1H), 3.27 (dd, *J* = 19.0, 5.5 Hz, 1H), 2.55 (s, 3H), 2.10 (s, 3H). EI-MS *m/z* 248 [M]<sup>-</sup>; HRMS (ESI) calcd for C<sub>13</sub>H<sub>12</sub>FNO<sub>3</sub> [M]<sup>-</sup>: 248.0728; observed: 248.0725.

**1-Acetyl-7-fluoro-3-(2-oxopropyl)indolin-2-one (1o):** white solid, 58% yield; <sup>1</sup>H NMR (400 MHz, DMSO) δ 7.23 – 7.17 (m, 1H), 7.17 – 7.10 (m, 2H), 4.05 (t, *J* = 4.5 Hz, 1H), 3.51 (dd, *J* = 19.0, 3.8 Hz, 1H), 3.26 (dd, *J* = 19.0, 5.5 Hz, 1H), 2.55 (s, 3H), 2.07 (s, 3H). EI-MS *m/z* 248 [M]<sup>-</sup>; HRMS (ESI) calcd for C<sub>13</sub>H<sub>12</sub>FNO<sub>3</sub> [M]<sup>-</sup>: 248.0728; observed: 248.0725.

#### **General procedure for the synthesis of products (3a–j).**

To a mixture of **1a–j** (0.11 mmol) and **2** (0.1 mmol) in CH<sub>2</sub>Cl<sub>2</sub> (3 mL) was added catalyst **d** (0.01 mmol). Then the mixture was reacted at –20 °C for 12h. After the completion of the reaction, the solvent was removed by evaporation. The crude product was purified by column chromatography on silica gel to afford the desired product **3a–j**.

**(1*S*,2*R*,3*S*,4*R*)-tert-Butyl-2-acetamido-4-hydroxy-4-methyl-3-nitro-2'-oxospiro-[cyclopentane-1,3'-indoline]-1'-carboxylate (3a):** white solid, 80% yield; (dr = 8:92, 83% ee for the major diastereomer); M.P.: 155.0–156.0°C, <sup>1</sup>H NMR (500 MHz, CDCl<sub>3</sub>) δ 7.73 (d, *J* = 7.1 Hz, 1H), 7.67 (d, *J* = 8.0 Hz, 1H), 7.30 (t, *J* = 7.3 Hz, 1H), 7.24 (d, *J* = 7.3 Hz, 1H), 6.03 (d, *J* = 10.1 Hz, 1H), 5.90 (t, *J* = 10.7 Hz, 1H), 5.11 (d,

$J = 11.4$  Hz, 1H), 3.37 (s, 1H), 2.49 (d,  $J = 14.5$  Hz, 1H), 2.28 (d,  $J = 14.5$  Hz, 1H), 1.82 (s, 3H), 1.65 (s, 9H), 1.61 (s, 3H).  $^{13}\text{C}$  NMR (126 MHz,  $\text{CDCl}_3$ )  $\delta$  178.71, 169.63, 148.32, 138.85, 130.15, 128.92, 125.83, 124.48, 114.52, 92.52, 85.25, 75.89, 58.74, 54.53, 48.47, 27.97, 25.47, 22.87. HRMS (ESI) calcd for  $\text{C}_{20}\text{H}_{25}\text{N}_3\text{O}_7\text{Na}$   $[\text{M}+\text{Na}^+]$ : 442.1590; observed: 442.1594. HPLC conditions: chiralpak OD-H, hexane/iso-PrOH = 85:15, flow rate = 0.8 mL/min,  $\lambda = 254$  nm, retention time: 11.46 min (major) and 15.95 min (minor).

**(1*S*,2*R*,3*S*,4*R*)-tert-Butyl-2-acetamido-4-hydroxy-4,5'-dimethyl-3-nitro-2'-oxospiro[cyclopentane-1,3'-indoline]-1'-carboxylate (3b)**: white solid, 75% yield; (dr = 3:97, 85% ee for the major diastereomer); M.P.: 156.9–159.6°C,  $^1\text{H}$  NMR (400 MHz,  $\text{CDCl}_3$ )  $\delta$  7.53 (d,  $J = 8.5$  Hz, 2H), 7.11 – 7.07 (m, 1H), 5.99 – 5.81 (m, 2H), 5.08 (d,  $J = 11.0$  Hz, 1H), 2.46 (d,  $J = 14.4$  Hz, 1H), 2.35 (s, 3H), 2.26 (d,  $J = 14.5$  Hz, 1H), 1.83 (s, 3H), 1.64 (s, 9H), 1.60 (s, 3H).  $^{13}\text{C}$  NMR (151 MHz,  $\text{CDCl}_3$ )  $\delta$  178.98, 169.59, 148.48, 136.60, 135.74, 130.16, 129.58, 125.03, 114.43, 92.68, 85.15, 75.94, 58.86, 54.61, 48.51, 28.09, 25.54, 23.01, 21.18. HRMS (ESI) calcd for  $\text{C}_{21}\text{H}_{27}\text{N}_3\text{O}_7\text{Na}$   $[\text{M}+\text{Na}^+]$ : 456.1747; observed: 456.1744. HPLC conditions: chiralpak OZ-3-H, hexane/iso-PrOH = 85:15, flow rate = 0.8 mL/min,  $\lambda = 220$  nm, retention time: 34.21 min (major) and 13.76 min (minor).

**(1*S*,2*R*,3*S*,4*R*)-tert-Butyl-2-acetamido-4-hydroxy-4,5',7'-trimethyl-3-nitro-2'-oxospiro[cyclopentane-1,3'-indoline]-1'-carboxylate (3c)**: white solid, 65% yield; (dr = 14:86, 67% ee for the major diastereomer); M.P.: 153.5–155.3°C,  $^1\text{H}$  NMR (400 MHz, DMSO)  $\delta$  8.13 (d,  $J = 8.3$  Hz, 1H), 7.24 (s, 1H), 6.90 (s, 1H), 5.98 (s, 1H), 5.59

– 5.49 (m, 1H), 5.12 (d,  $J = 11.6$  Hz, 1H), 2.42 (d,  $J = 14.6$  Hz, 1H), 2.28 (s, 3H), 2.12 (d,  $J = 7.6$  Hz, 1H), 2.06 (s, 3H), 1.57 (s, 3H), 1.53 (s, 9H), 1.50 (s, 3H).  $^{13}\text{C}$  NMR (126 MHz, DMSO)  $\delta$  178.33, 169.21, 148.95, 135.84, 134.13, 132.60, 131.93, 122.54, 122.32, 92.68, 84.75, 75.66, 59.15, 55.24, 48.75, 27.80, 26.58, 22.65, 21.17, 19.19. HRMS (ESI) calcd for  $\text{C}_{22}\text{H}_{29}\text{N}_3\text{O}_7\text{Na}$  [ $\text{M}+\text{Na}^+$ ]: 470.1903; observed: 470.1890. HPLC conditions: chiralpak OZ-3-H, hexane/iso-PrOH = 80:20, flow rate = 0.8 mL/min,  $\lambda = 220$  nm, retention time: 23.02 min (major) and 10.73 min (minor).

**(1*S*,2*R*,3*S*,4*R*)-tert-Butyl-2-acetamido-4-hydroxy-5'-methoxy-4-methyl-3-nitro-2'-oxospiro[cyclopentane-1,3'-indoline]-1'-carboxylate (3d):** white solid, 76% yield; (dr = 9:91, 94% ee for the major diastereomer); M.P.: 177.4–178.6°C,  $^1\text{H}$  NMR (400 MHz, DMSO)  $\delta$  8.23 (d,  $J = 8.1$  Hz, 1H), 7.53 (d,  $J = 8.9$  Hz, 1H), 7.26 (d,  $J = 2.6$  Hz, 1H), 6.86 (dd,  $J = 8.9, 2.6$  Hz, 1H), 6.02 (s, 1H), 5.53 (dd,  $J = 11.3, 8.3$  Hz, 1H), 5.18 (d,  $J = 11.4$  Hz, 1H), 3.78 (s, 3H), 2.50 (d,  $J = 14.7$  Hz, 1H), 2.15 (d,  $J = 14.7$  Hz, 1H), 1.61 (s, 3H), 1.56 (s, 9H), 1.53 (s, 3H).  $^{13}\text{C}$  NMR (126 MHz, DMSO)  $\delta$  177.28, 169.41, 157.11, 148.76, 132.99, 132.75, 115.25, 113.20, 110.98, 92.90, 84.09, 75.68, 59.26, 55.86, 55.24, 49.35, 28.11, 26.65, 22.61. HRMS (ESI) calcd for  $\text{C}_{21}\text{H}_{27}\text{N}_3\text{O}_8\text{Na}$  [ $\text{M}+\text{Na}^+$ ]: 472.1696; observed: 472.1705. HPLC conditions: chiralpak OZ-3-H, hexane/iso-PrOH = 85:15, flow rate = 0.8 mL/min,  $\lambda = 254$  nm, retention time: 37.32 min (major) and 13.56 min (minor).

**(1*S*,2*R*,3*S*,4*R*)-tert-Butyl-2-acetamido-4-hydroxy-5'-trifluoromethoxy-4-methyl-3-nitro-2'-oxospiro[cyclopentane-1,3'-indoline]-1'-carboxylate (3e):** white solid, 90% yield; (dr = 3:97, 67% ee for the major diastereomer); M.P.: 169.6–170.7°C,  $^1\text{H}$  NMR

(500 MHz, DMSO)  $\delta$  8.29 (d,  $J$  = 7.9 Hz, 1H), 7.64 (d,  $J$  = 8.9 Hz, 1H), 7.60 (d,  $J$  = 1.9 Hz, 1H), 7.26 (dd,  $J$  = 8.9, 1.8 Hz, 1H), 6.04 (s, 1H), 5.42 (dd,  $J$  = 11.3, 7.9 Hz, 1H), 5.10 (d,  $J$  = 11.4 Hz, 1H), 2.48 (d,  $J$  = 14.8 Hz, 1H), 2.10 (d,  $J$  = 14.8 Hz, 1H), 1.56 (s, 3H), 1.51 (s, 9H), 1.48 (s, 3H).  $^{13}\text{C}$  NMR (126 MHz, DMSO)  $\delta$  176.57, 169.67, 148.55, 145.64, 138.49, 134.27, 121.42, 120.6 (q,  $J$  = 255.8 Hz) 117.75, 115.77, 92.77, 84.71, 75.90, 59.72, 55.26, 49.06, 28.06, 26.30, 22.46. HRMS (ESI) calcd for  $\text{C}_{21}\text{H}_{24}\text{F}_3\text{N}_3\text{O}_8\text{Na}$   $[\text{M}]^-$ : 502.1443; observed: 502.1445. HPLC conditions: chiralpak OZ-3-H, hexane/iso-PrOH = 90:10, flow rate = 1.0 mL/min,  $\lambda$  = 230 nm, retention time: 12.46 min (major) and 6.78 min (minor).

**(1*S*,2*R*,3*S*,4*R*)-tert-Butyl-2-acetamido-4-hydroxy-5'-fluoro-4-methyl-3-nitro-2'-oxospiro[cyclopentane-1,3'-indoline]-1'-carboxylate (3f)**: white solid, 87 % yield; (dr = 3:97, 93% ee for the major diastereomer); M.P.: 140.0–141.5°C,  $^1\text{H}$  NMR (400 MHz,  $\text{CDCl}_3$ )  $\delta$  7.66 (dd,  $J$  = 9.0, 4.4 Hz, 1H), 7.51 (dd,  $J$  = 7.8, 2.5 Hz, 1H), 7.00 (td,  $J$  = 8.8, 2.5 Hz, 1H), 5.98 (d,  $J$  = 10.1 Hz, 1H), 5.89 – 5.80 (m, 1H), 5.03 (d,  $J$  = 11.3 Hz, 1H), 2.48 (d,  $J$  = 14.5 Hz, 1H), 2.26 (d,  $J$  = 14.5 Hz, 1H), 1.85 (s, 3H), 1.64 (s, 9H), 1.61 (s, 3H).  $^{13}\text{C}$  NMR (151 MHz,  $\text{CDCl}_3$ )  $\delta$  178.22, 169.56, 160.75 (d,  $J_{\text{C-F}}$  = 246.1 Hz), 148.32, 134.88 (d,  $J_{\text{C-F}}$  = 1.5 Hz), 132.53 (d,  $J_{\text{C-F}}$  = 9.1 Hz), 116.09 (d,  $J_{\text{C-F}}$  = 7.6 Hz), 115.73 (d,  $J_{\text{C-F}}$  = 22.7 Hz), 112.28 (d,  $J_{\text{C-F}}$  = 25.7 Hz), 92.57, 85.49, 76.08, 59.11, 54.90, 48.17, 28.07, 25.17, 22.97. HRMS (ESI) calcd for  $\text{C}_{20}\text{H}_{24}\text{FN}_3\text{O}_7\text{Na}$   $[\text{M}+\text{Na}^+]$ : 460.1496; observed: 460.1483. HPLC conditions: chiralpak OZ-3-H, hexane/iso-PrOH = 90:10, flow rate = 1.0 mL/min,  $\lambda$  = 220 nm, retention time: 25.16 min (major) and 13.86 min (minor).

**(1*S*,2*R*,3*S*,4*R*)-tert-Butyl-2-acetamido-4-hydroxy-5'-chloro-4-methyl-3-nitro-2'-oxospiro[cyclopentane-1,3'-indoline]-1'-carboxylate (3g):** white solid, 95% yield; (dr =17:83, 88% ee for the major diastereomer); M.P.: 161.2–163.6°C, <sup>1</sup>H NMR (400 MHz, CDCl<sub>3</sub>) δ 7.75 (s, 1H), 7.64 (d, *J* = 8.8 Hz, 1H), 7.34 – 7.27 (m, 1H), 5.94 (d, *J* = 9.8 Hz, 1H), 5.84 (t, *J* = 10.4 Hz, 1H), 5.00 (d, *J* = 11.2 Hz, 1H), 2.47 (d, *J* = 14.5 Hz, 1H), 2.28 (s, 1H), 2.21 (d, *J* = 20.4 Hz, 1H), 1.85 (s, 3H), 1.64 (s, 9H), 1.60 (s, 3H). <sup>13</sup>C NMR (151 MHz, CDCl<sub>3</sub>) δ 177.98, 169.64, 148.20, 137.47, 132.39, 131.42, 129.14, 124.95, 115.96, 92.58, 85.67, 76.09, 59.11, 54.75, 48.22, 28.06, 25.17, 22.97. HRMS (ESI) calcd for C<sub>20</sub>H<sub>24</sub>ClN<sub>3</sub>O<sub>7</sub>Na [M+Na<sup>+</sup>]: 476.1200; observed: 476.1199. HPLC conditions: chiralpak OZ-3-H, hexane/iso-PrOH = 90:10, flow rate = 0.8 mL/min, λ = 254 nm, retention time: 35.91 min (major) and 18.41 min (minor).

**(1*S*,2*R*,3*S*,4*R*)-tert-Butyl-2-acetamido-4-hydroxy-7'-fluoro-4-methyl-3-nitro-2'-oxospiro[cyclopentane-1,3'-indoline]-1'-carboxylate (3h):** white solid, 88% yield; (dr =3:97, 76% ee for the major diastereomer); M.P.: 122.7–125.2°C, <sup>1</sup>H NMR (400 MHz, CDCl<sub>3</sub>) δ 7.54 (d, *J* = 7.5 Hz, 1H), 7.22 (td, *J* = 7.9, 4.4 Hz, 1H), 7.11 – 7.00 (m, 1H), 6.01 (d, *J* = 9.9 Hz, 1H), 5.88 (t, *J* = 10.8 Hz, 1H), 5.06 (d, *J* = 11.4 Hz, 1H), 2.65 (s, 1H), 2.50 (d, *J* = 14.5 Hz, 1H), 2.30 (d, *J* = 14.6 Hz, 1H), 1.85 (s, 3H), 1.62 (s, 3H), 1.60 (s, 9H). <sup>13</sup>C NMR (151 MHz, CDCl<sub>3</sub>) δ 177.76, 169.65, 147.99 (d, *J*<sub>C-F</sub> =250.7Hz), 146.91, 133.50, 126.91 (d, *J*<sub>C-F</sub> =7.6Hz), 125.90 (d, *J*<sub>C-F</sub> =9.1Hz), 120.42 (d, *J*<sub>C-F</sub> =3.0Hz), 117.35 (d, *J*<sub>C-F</sub> =19.6Hz), 92.26, 85.88, 76.07, 59.10, 55.18, 47.80, 27.65, 25.46, 22.92. HRMS (ESI) calcd for C<sub>20</sub>H<sub>24</sub>FN<sub>3</sub>O<sub>7</sub>Na [M+Na<sup>+</sup>]: 460.1496; observed: 460.1487. HPLC conditions: chiralpak OZ-3-H, hexane/iso-PrOH = 85:15,

flow rate = 0.8 mL/min,  $\lambda$  = 220 nm, retention time: 35.28 min (major) and 25.77 min (minor).

**(1*S*,2*R*,3*S*,4*R*)-tert-Butyl-2-acetamido-4-hydroxy-6'-chloro-4-methyl-3-nitro-2'-oxospiro[cyclopentane-1,3'-indoline]-1'-carboxylate (3i):** white solid, 85% yield; (dr = 6:94, 92% ee for the major diastereomer); M.P.: 138.5–141.4°C, <sup>1</sup>H NMR (400 MHz, CDCl<sub>3</sub>)  $\delta$  7.75 (s, 1H), 7.66 (d, *J* = 8.1 Hz, 1H), 7.23 (d, *J* = 8.1 Hz, 1H), 5.98 – 5.76 (m, 2H), 5.03 (d, *J* = 11.1 Hz, 1H), 3.31 (s, 1H), 2.46 (d, *J* = 14.6 Hz, 1H), 2.23 (d, *J* = 14.3 Hz, 1H), 1.85 (s, 3H), 1.65 (s, 9H), 1.60 (s, 3H). <sup>13</sup>C NMR (151 MHz, CDCl<sub>3</sub>)  $\delta$  178.22, 169.52, 148.13, 139.82, 134.81, 128.79, 126.04, 125.55, 115.57, 92.47, 85.84, 75.98, 58.87, 54.43, 48.32, 28.04, 25.36, 23.02. HRMS (ESI) calcd for C<sub>20</sub>H<sub>24</sub>ClN<sub>3</sub>O<sub>7</sub>Na [M+Na<sup>+</sup>]: 476.1200; observed: 476.1210. HPLC conditions: chiralpak OZ-3-H, hexane/iso-PrOH = 90:10, flow rate = 0.8 mL/min,  $\lambda$  = 254 nm, retention time: 51.61 min (major) and 34.22 min (minor).

**(1*S*,2*R*,3*S*,4*R*)-tert-Butyl-2-acetamido-4-hydroxy-6'-bromo-4-methyl-3-nitro-2'-oxospiro[cyclopentane-1,3'-indoline]-1'-carboxylate (3j):** white solid, 79% yield; (dr = 3:97, 52% ee for the major diastereomer); M.P.: 144.5–147.6°C, <sup>1</sup>H NMR (500 MHz, DMSO)  $\delta$  8.31 (d, *J* = 7.9 Hz, 1H), 7.77 (d, *J* = 1.8 Hz, 1H), 7.59 (d, *J* = 8.1 Hz, 1H), 7.46 (dd, *J* = 8.1, 1.8 Hz, 1H), 6.04 (s, 1H), 5.45 (dd, *J* = 11.3, 7.9 Hz, 1H), 5.12 (d, *J* = 11.3 Hz, 1H), 2.49 (d, *J* = 14.3 Hz, 1H), 2.13 (d, *J* = 14.7 Hz, 1H), 1.61 (s, 3H), 1.56 (s, 9H), 1.52 (s, 3H). <sup>13</sup>C NMR (126 MHz, DMSO)  $\delta$  176.06, 169.11, 148.09, 140.29, 131.17, 127.45, 125.99, 120.44, 116.70, 92.27, 84.29, 75.39, 59.12, 54.44, 48.58, 27.54, 25.82, 22.02. HRMS (ESI) calcd for C<sub>20</sub>H<sub>24</sub>BrN<sub>3</sub>O<sub>7</sub> [M]<sup>+</sup>: 496.0725;

observed: 496.0740. HPLC conditions: chiralpak OZ-3-H, hexane/iso-PrOH = 90:10, flow rate = 1.0 mL/min,  $\lambda$  = 230 nm, retention time: 43.95 min (major) and 28.58 min (minor).

**General procedure for the synthesis of products (3k–o).**

3-Substituted oxindoles **1k–o** (0.11mmol) and nitrovinylacetamide **2a** (0.1mmol) were dissolved in 3 mL CH<sub>2</sub>Cl<sub>2</sub>, the catalyst **d** (0.01 mmol) was added at –10 °C for 24 h. After nitrovinylacetamide **2a** was consumed completely, the solvent was removed under vacuum. The crude product was purified by column chromatography on silica gel to afford the desired product **3k–o**.

***N*-((1*S*,2*R*,3*S*,4*R*)-1'-acetyl-3-hydroxy-3-methyl-4-nitro-2'-oxospiro[cyclopentane-1,3'-indolin]-5-yl)acetamide (3k):** white solid, 50% yield; (dr =4:96, 4% ee for the major diastereomer); M.P.: 192.0–193.3°C, <sup>1</sup>H NMR (500 MHz, DMSO)  $\delta$  8.18 (d, *J* = 8.4 Hz, 1H), 7.97 – 7.94 (m, 1H), 7.68 – 7.63 (m, 1H), 7.32 – 7.24 (m, 2H), 6.03 (s, 1H), 5.58 (dd, *J* = 11.5, 8.4 Hz, 1H), 5.18 (d, *J* = 11.5 Hz, 1H), 2.58 (s, 3H), 2.54 (d, *J* = 14.7 Hz, 1H), 2.19 (d, *J* = 14.7 Hz, 1H), 1.59 (s, 3H), 1.55 (s, 3H). <sup>13</sup>C NMR (126 MHz, DMSO)  $\delta$  179.81, 170.70, 169.47, 140.09, 131.76, 128.59, 125.82, 124.50, 115.43, 92.90, 75.62, 59.27, 55.06, 49.31, 26.71, 26.68, 22.59. HRMS (ESI) calcd for C<sub>17</sub>H<sub>19</sub>N<sub>3</sub>O<sub>6</sub> [M]<sup>+</sup>: 360.1201; observed: 360.1202. HPLC conditions: chiralpak AD-H, hexane/iso-PrOH = 85:15, flow rate = 1.0 mL/min,  $\lambda$  = 230 nm, retention time: 32.74 min (major) and 7.56 min (minor).

***N*-((1*S*,2*R*,3*S*,4*R*)-1'-Acetyl-3-hydroxy-3,5'-dimethyl-4-nitro-2'-oxospiro[cyclopentane-1,3'-indolin]-5-yl)acetamide (3l):** white solid, 74% yield; (dr =8:92, 11% ee

for the major diastereomer); M.P.: 173.1–175.5°C,  $^1\text{H}$  NMR (500 MHz, DMSO)  $\delta$  8.17 (d,  $J$  = 8.4 Hz, 1H), 7.85 (d,  $J$  = 8.3 Hz, 1H), 7.48 (s, 1H), 7.11 (d,  $J$  = 7.3 Hz, 1H), 6.02 (s, 1H), 5.57 (dd,  $J$  = 11.4, 8.4 Hz, 1H), 5.18 (d,  $J$  = 11.5 Hz, 1H), 2.58 (s, 3H), 2.55 (d,  $J$  = 14.7 Hz, 1H), 2.35 (s, 3H), 2.19 (d,  $J$  = 14.7 Hz, 1H), 1.61 (s, 3H), 1.55 (s, 3H).  $^{13}\text{C}$  NMR (126 MHz, DMSO)  $\delta$  179.43, 170.00, 168.96, 137.34, 134.32, 131.24, 128.52, 124.31, 114.77, 92.43, 75.11, 58.75, 54.55, 48.79, 26.19, 26.10, 22.11, 20.88. HRMS (ESI) calcd for  $\text{C}_{18}\text{H}_{21}\text{N}_3\text{O}_6$   $[\text{M}]^-$ : 374.1358; observed: 374.1352. HPLC conditions: chiralpak AD-H, hexane/iso-PrOH = 85:15, flow rate = 1.0 mL/min,  $\lambda$  = 254 nm, retention time: 24.06 min (major) and 5.97 min (minor).

***N*-((1*S*,2*R*,3*S*,4*R*)-1'-acetyl-3-hydroxy-5'-methoxy-3-methyl-4-nitro-2'-oxospiro[cyclopentane-1,3'-indolin]-5-yl)acetamide (3m)**: white solid, 47% yield; (dr = 7:93, 12% ee for the major diastereomer); M.P.: 150.0–156.4°C,  $^1\text{H}$  NMR (500 MHz, DMSO)  $\delta$  8.18 (d,  $J$  = 8.4 Hz, 1H), 7.88 (d,  $J$  = 8.9 Hz, 1H), 7.26 (d,  $J$  = 2.7 Hz, 1H), 6.84 (dd,  $J$  = 8.9, 2.8 Hz, 1H), 6.04 (s, 1H), 5.56 (dd,  $J$  = 11.5, 8.4 Hz, 1H), 5.17 (d,  $J$  = 11.5 Hz, 1H), 3.77 (s, 3H), 2.55 (s, 3H), 2.52 (d,  $J$  = 14.8 Hz, 1H), 2.19 (d,  $J$  = 14.8 Hz, 1H), 1.60 (s, 3H), 1.54 (s, 3H).  $^{13}\text{C}$  NMR (126 MHz, DMSO)  $\delta$  179.74, 170.27, 169.50, 157.44, 133.50, 133.20, 116.43, 113.16, 110.73, 92.92, 75.61, 59.28, 55.86, 55.31, 49.20, 26.71, 26.51, 22.59. HRMS (ESI) calcd for  $\text{C}_{18}\text{H}_{21}\text{N}_3\text{O}_7$   $[\text{M}]^-$ : 390.1307; observed: 390.1315. HPLC conditions: chiralpak AD-H, hexane/iso-PrOH = 85:15, flow rate = 1.0 mL/min,  $\lambda$  = 254 nm, retention time: major diastereomer: 39.47 min (major) and 9.19 min (minor).



***N*-((1*S*,2*R*,3*S*,4*R*)-1'-acetyl-5'-fluoro-3-hydroxy-3-methyl-4-nitro-2'-oxospiro[cyclopentane-1,3'-indolin]-5-yl)acetamide (3n):** white solid, 53% yield; (dr =2:98, 24% ee for the major diastereomer); M.P.: 194.6–195.7°C, <sup>1</sup>H NMR (600 MHz, DMSO) δ 8.28 (d, *J* = 8.1 Hz, 1H), 7.97 (dd, *J* = 9.0, 4.8 Hz, 1H), 7.51 (dd, *J* = 8.4, 2.8 Hz, 1H), 7.12 (td, *J* = 9.1, 2.8 Hz, 1H), 6.07 (s, 1H), 5.52 (dd, *J* = 11.4, 8.2 Hz, 1H), 5.15 (d, *J* = 11.5 Hz, 1H), 2.55 (s, 3H), 2.53 (d, *J* = 14.8 Hz, 1H), 2.19 (d, *J* = 14.8 Hz, 1H), 1.60 (s, 3H), 1.53 (s, 3H). <sup>13</sup>C NMR (151 MHz, DMSO) δ 179.26, 170.53, 169.70, 160.10 (d, *J*<sub>C-F</sub> = 241.6 Hz) 136.43, 134.42 (d, *J*<sub>C-F</sub> = 9.1 Hz), 117.06 (d, *J*<sub>C-F</sub> = 7.6 Hz), 115.07 (d, *J*<sub>C-F</sub> = 22.7 Hz), 111.85 (d, *J*<sub>C-F</sub> = 24.2 Hz), 92.77, 75.76, 59.50, 55.35, 48.96, 26.57, 26.52, 22.53. HRMS (ESI) calcd for C<sub>17</sub>H<sub>18</sub>FN<sub>3</sub>O<sub>6</sub> [M]<sup>+</sup>: 378.1107; observed: 378.1105. HPLC conditions: chiralpak AD-H, hexane/iso-PrOH = 85:15, flow rate = 1.0 mL/min, λ = 254 nm, retention time: 13.29 min (major) and 5.87 min (minor).

***N*-((1*S*,2*R*,3*S*,4*R*)-1'-acetyl-7'-fluoro-3-hydroxy-3-methyl-4-nitro-2'-oxospiro[cyclopentane-1,3'-indolin]-5-yl)acetamide (3o):** white solid, 53% yield; (dr =9:91, 34% ee for the major diastereomer); M.P.: 173.5–174.8°C, <sup>1</sup>H NMR (600 MHz, DMSO) δ 8.25 (d, *J* = 8.2 Hz, 1H), 7.47 (dd, *J* = 7.5, 0.9 Hz, 1H), 7.30 (td, *J* = 8.1, 4.4 Hz, 1H), 7.15 (dd, *J* = 10.7, 8.4 Hz, 1H), 6.05 (s, 1H), 5.51 (dd, *J* = 11.5, 8.2 Hz, 1H), 5.10 (d, *J* = 11.5 Hz, 1H), 2.57 (s, 3H), 2.54 (d, *J* = 14.9 Hz, 1H), 2.19 (d, *J* = 14.9 Hz, 1H), 1.57 (s, 3H), 1.52 (s, 3H). <sup>13</sup>C NMR (151 MHz, DMSO) δ 179.06, 169.54, 168.06, 148.83 (d, *J*<sub>C-F</sub> = 252.2 Hz), 135.69 (d, *J*<sub>C-F</sub> = 3.0 Hz), 127.48 (d, *J*<sub>C-F</sub> = 7.6 Hz), 125.92 (d, *J*<sub>C-F</sub> = 10.6 Hz), 120.41 (d, *J*<sub>C-F</sub> = 3.0 Hz), 116.94 (d, *J*<sub>C-F</sub> = 21.1 Hz), 92.58,

75.76, 59.82, 56.17, 48.64, 26.51, 25.97, 22.53. HRMS (ESI) calcd for C<sub>17</sub>H<sub>18</sub>FN<sub>3</sub>O<sub>6</sub> [M]<sup>-</sup>: 378.1107; observed: 378.1108. HPLC conditions: chiralpak AD-H, hexane/iso-PrOH = 85:15, flow rate = 1.0 mL/min, λ= 230 nm, retention time: 27.04 min (major) and 7.58 min (minor).

## References

- [1] Zhu, S.; Yu, S.; Wang, Y.; Ma, D. *Angew. Chem. Int. Ed.* **2010**, *49*, 4656-4660.
- [2] Albertshofer, K.; Tan, B.; Barbas, C. F., III *Org. Lett.* **2012**, *14*, 1834-1837.

## (B) $^1\text{H}$ and $^{13}\text{C}$ NMR Spectra for Substrates and Products

### (Z)-N-(2-nitrovinyl)acetamide (**2a**)

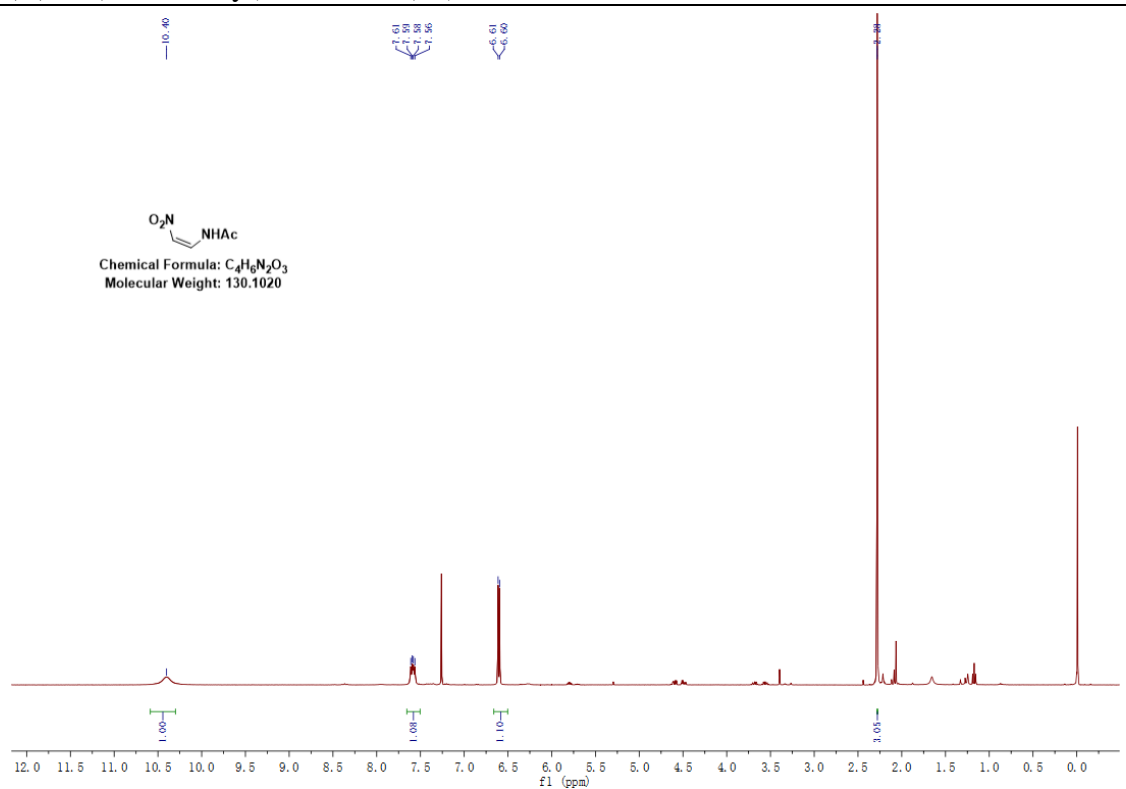

### (Z)-N-methyl-2-nitroethenamine (**2b**)

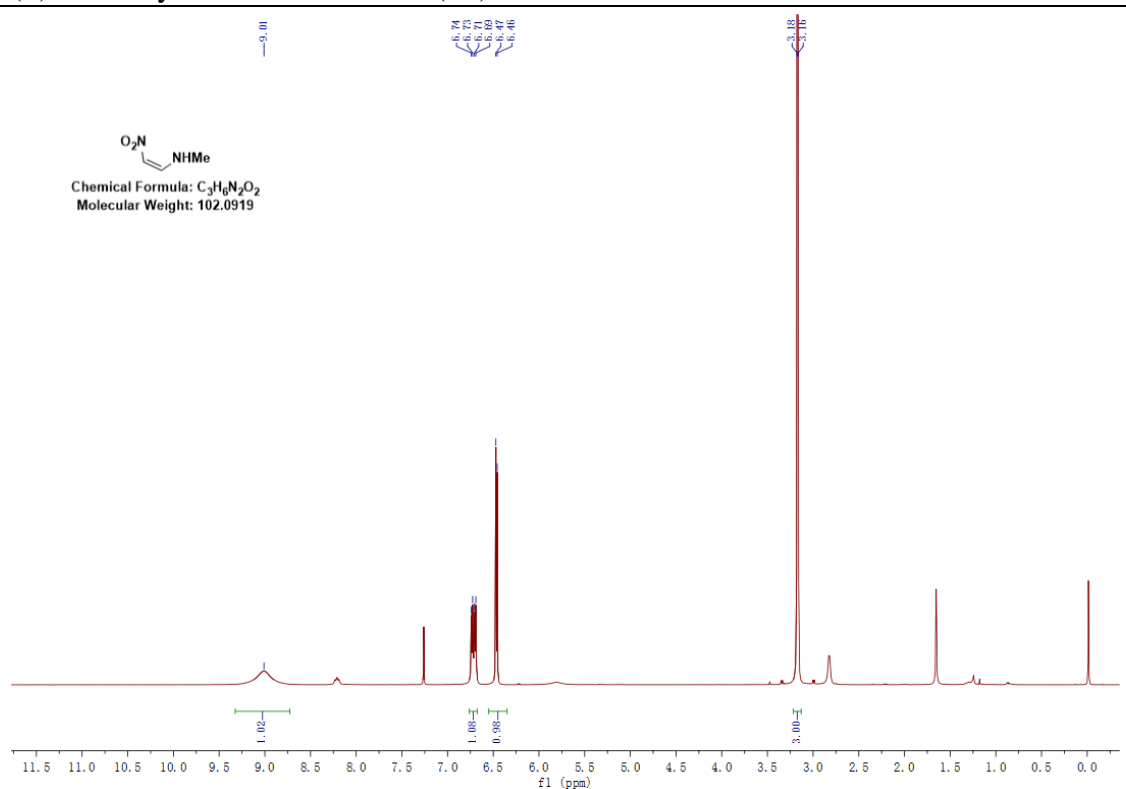

(Z)-tert-butyl-(2-nitrovinyl)carbamate (**2c**)

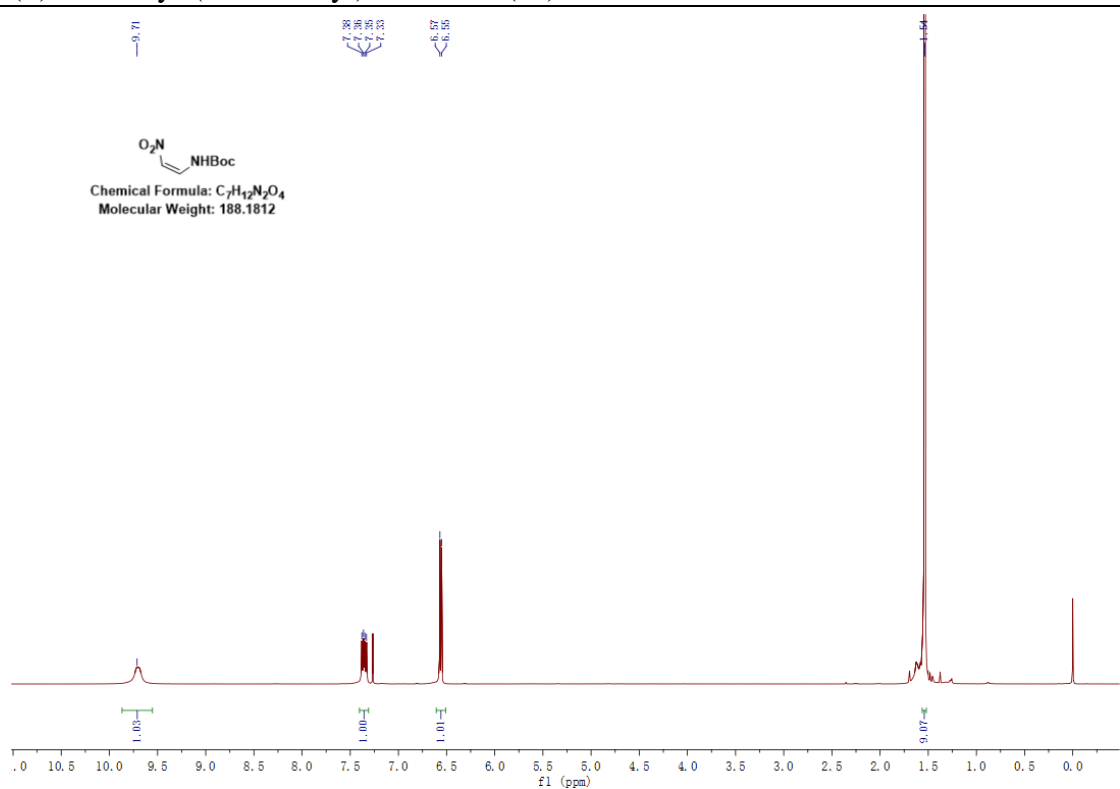

1-tert-Butyloxycarbonyl-3-(2-oxopropyl)indolin-2-one (**1a**)

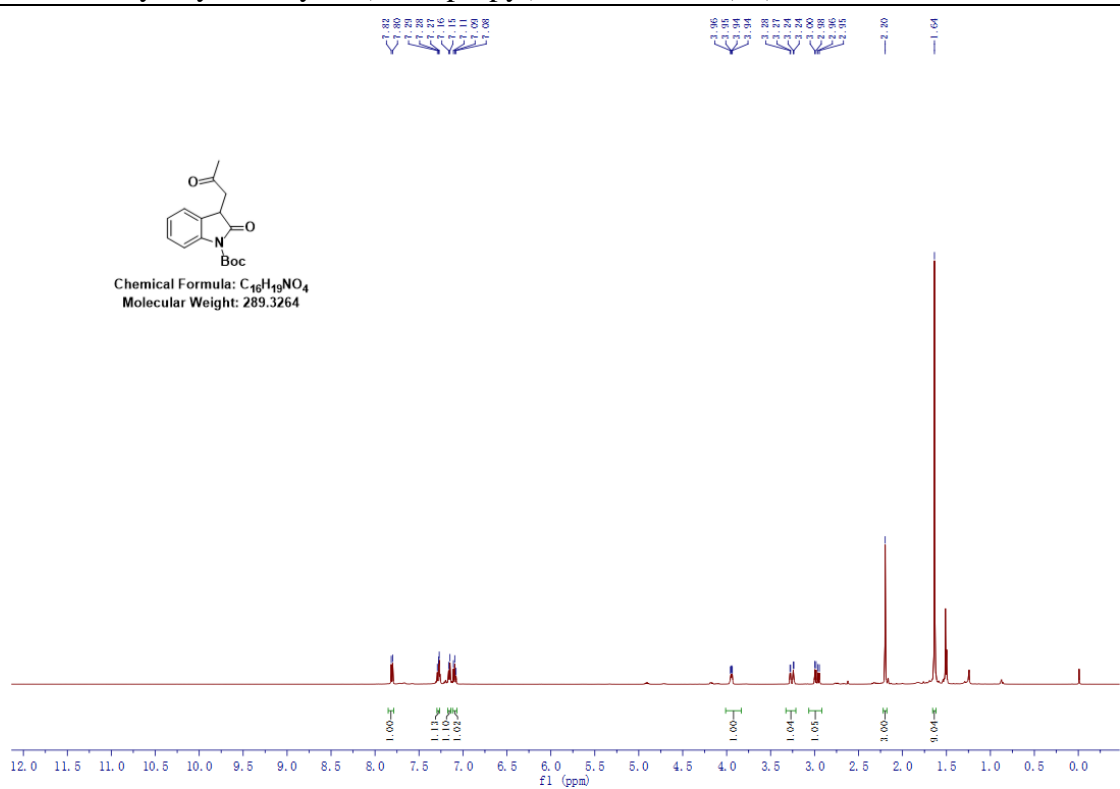

# 1-*tert*-Butyloxycarbonyl-5-methyl-3-(2-oxopropyl)indolin-2-one (**1b**)

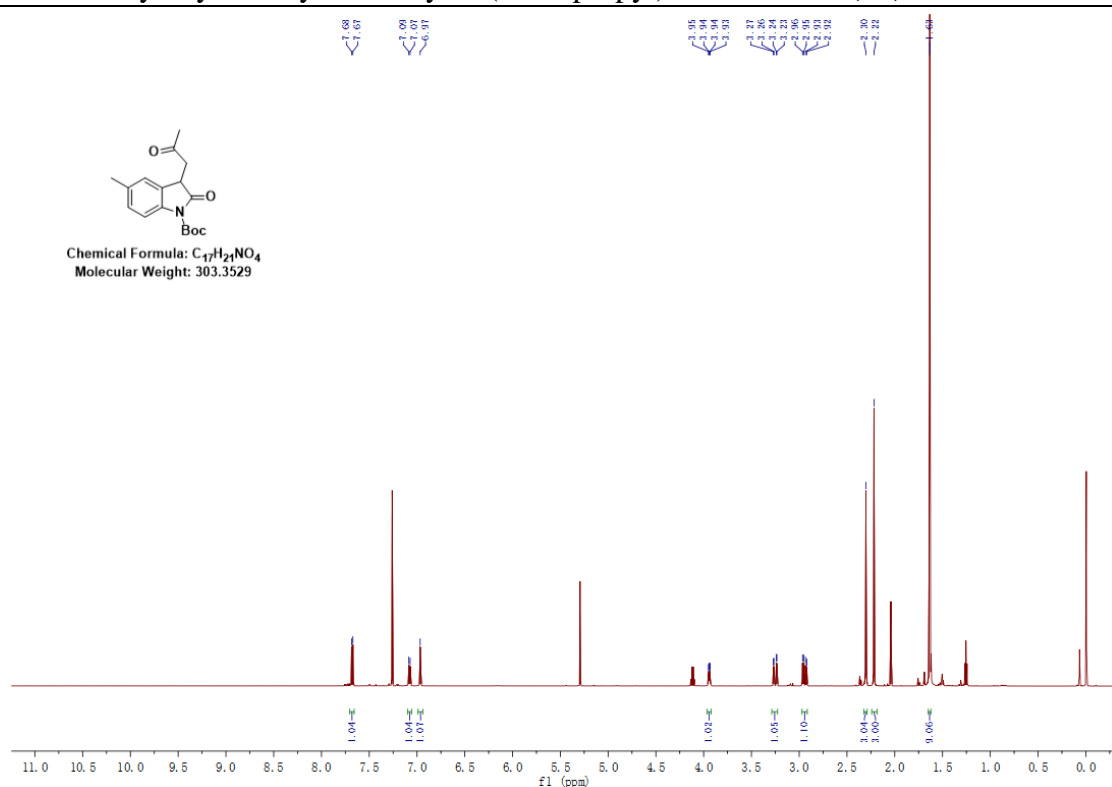

# 1-*tert*-Butyloxycarbonyl-5,7-dimethyl-3-(2-oxopropyl)indolin-2-one (**1c**)

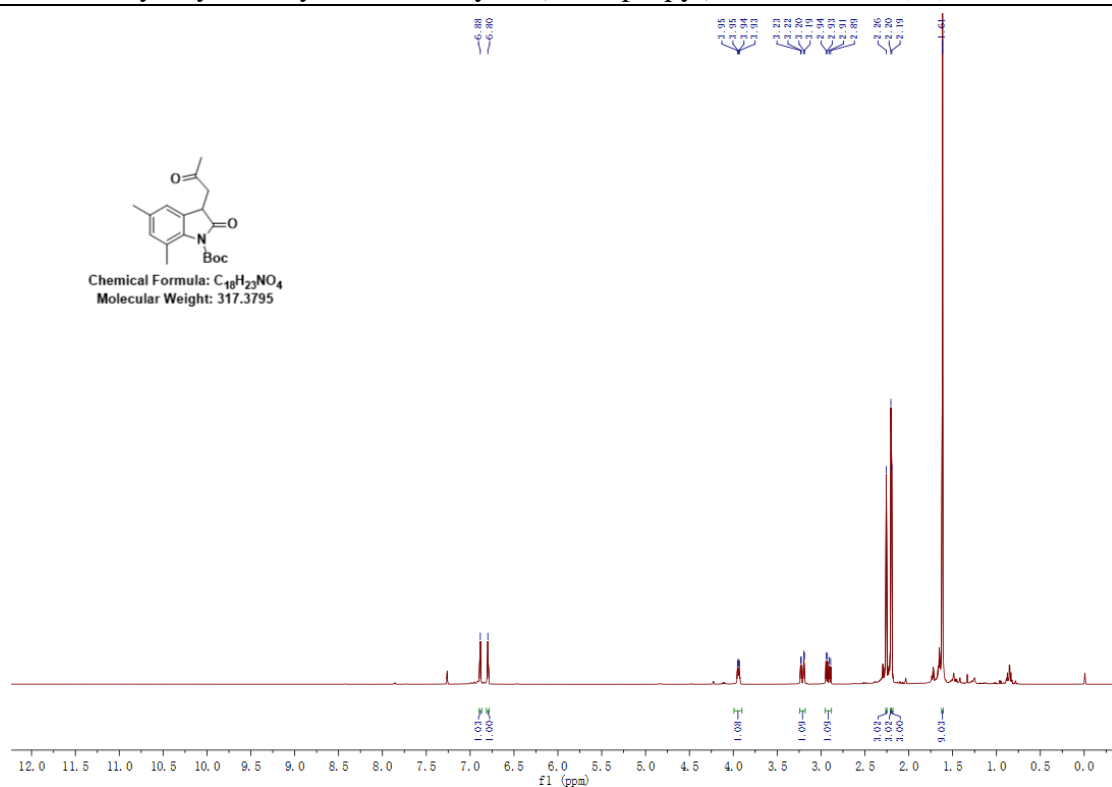

# 1-*tert*-Butyloxycarbonyl-5-methoxy-3-(2-oxopropyl)indolin-2-one (**1d**)

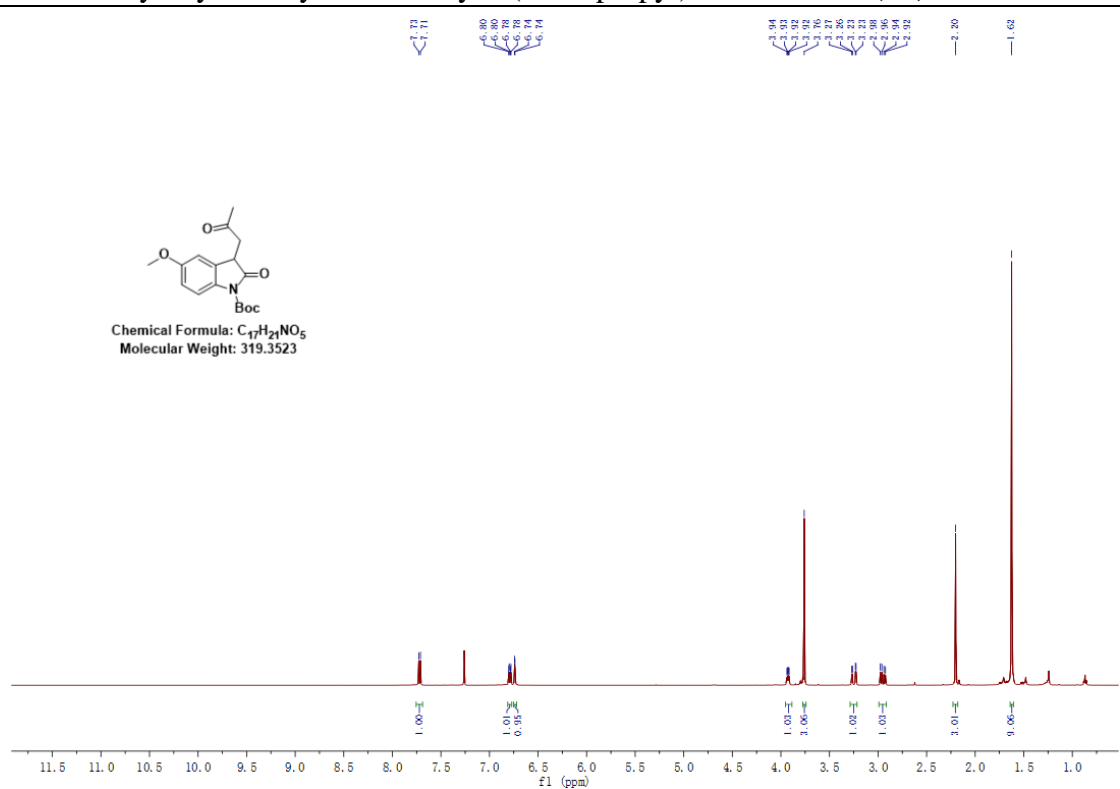

# 1-*tert*-Butyloxycarbonyl-5-trifluoromethoxy-3-(2-oxopropyl)indolin-2-one (**1e**)

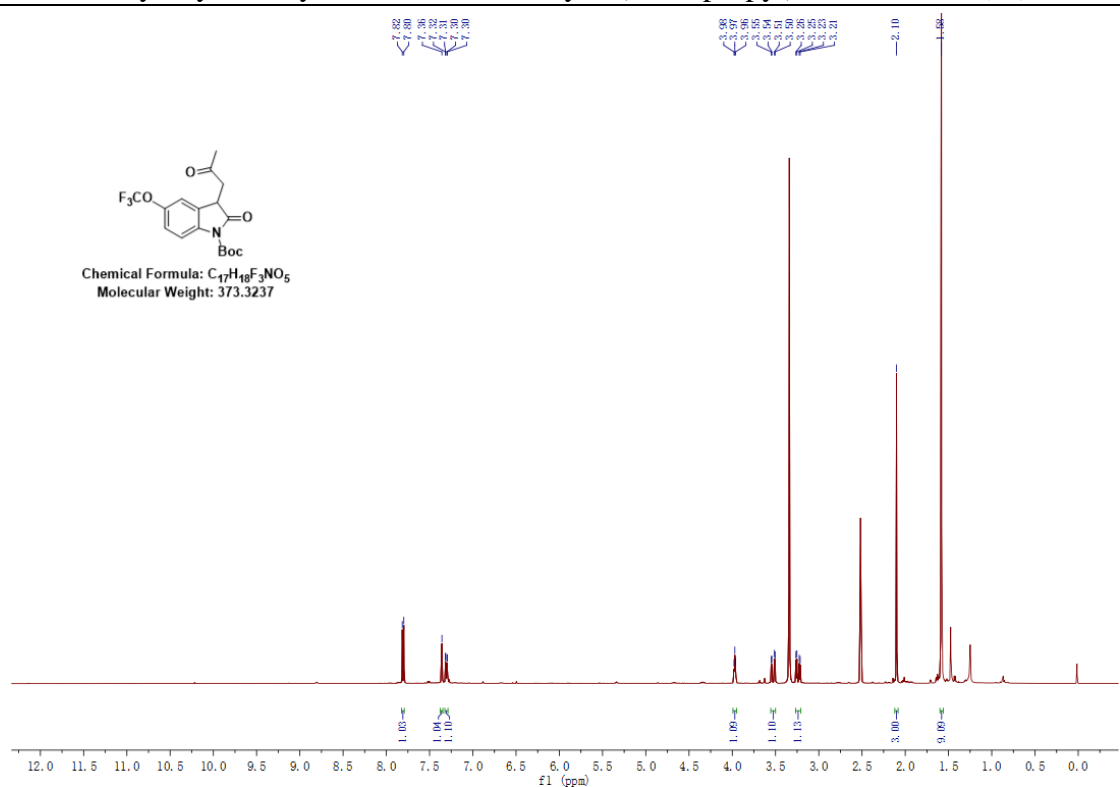

# 1-*tert*-Butyloxycarbonyl-5-fluoro-3-(2-oxopropyl)indolin-2-one (**1f**)

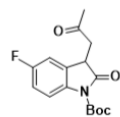

Chemical Formula:  $C_{18}H_{18}FNO_4$   
Molecular Weight: 307.3168

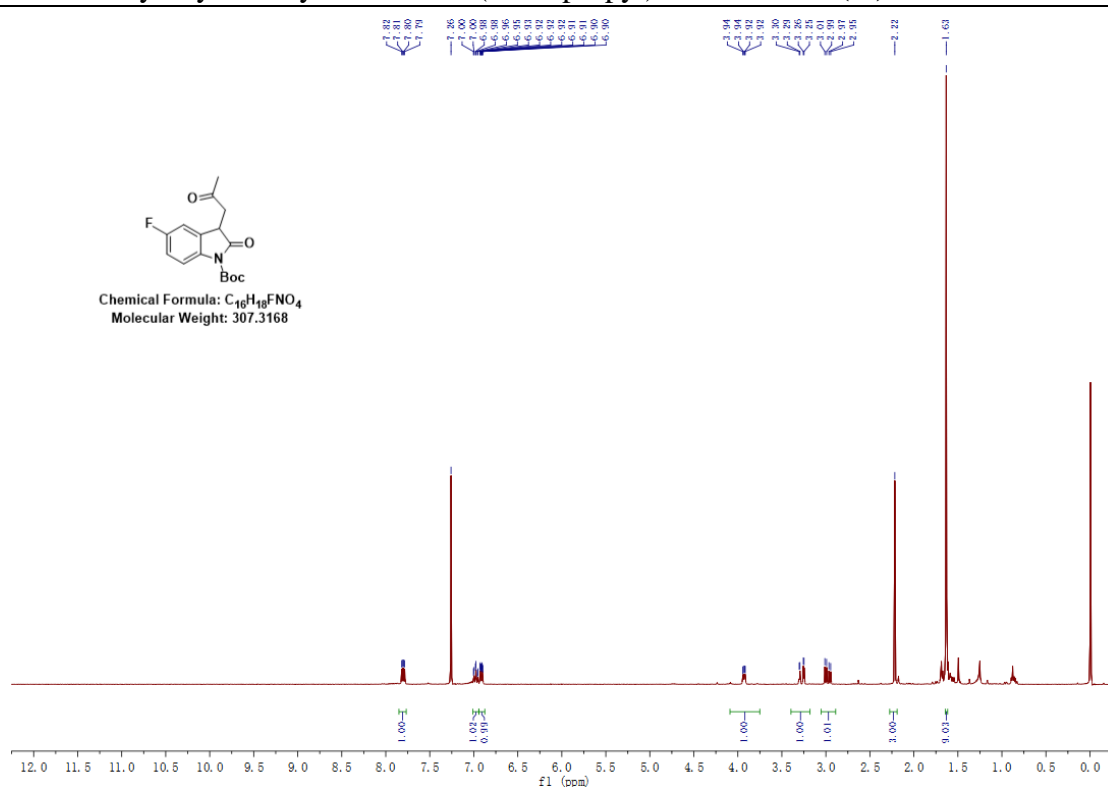

# 1-*tert*-Butyloxycarbonyl-5-chloro-3-(2-oxopropyl)indolin-2-one (**1g**)

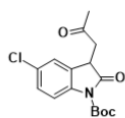

Chemical Formula:  $C_{18}H_{17}ClNO_4$   
Molecular Weight: 323.7714

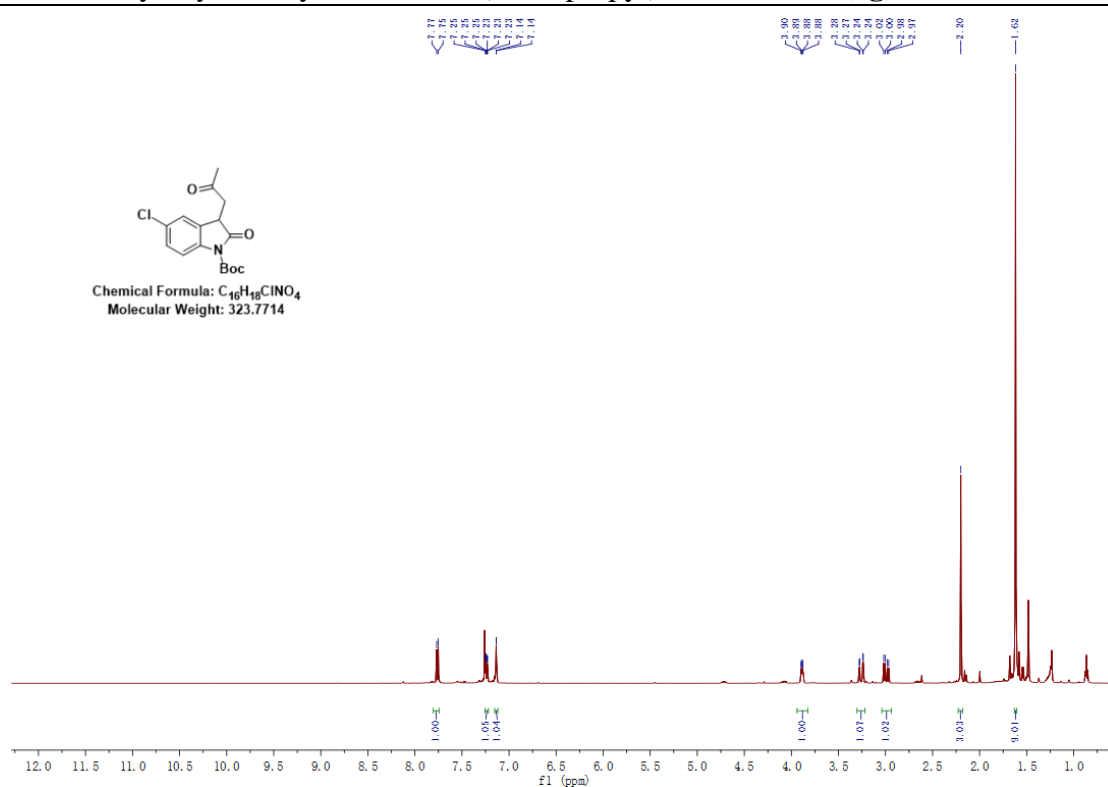

# 1-*tert*-Butyloxycarbonyl-7-fluoro-3-(2-oxopropyl)indolin-2-one (**1h**)

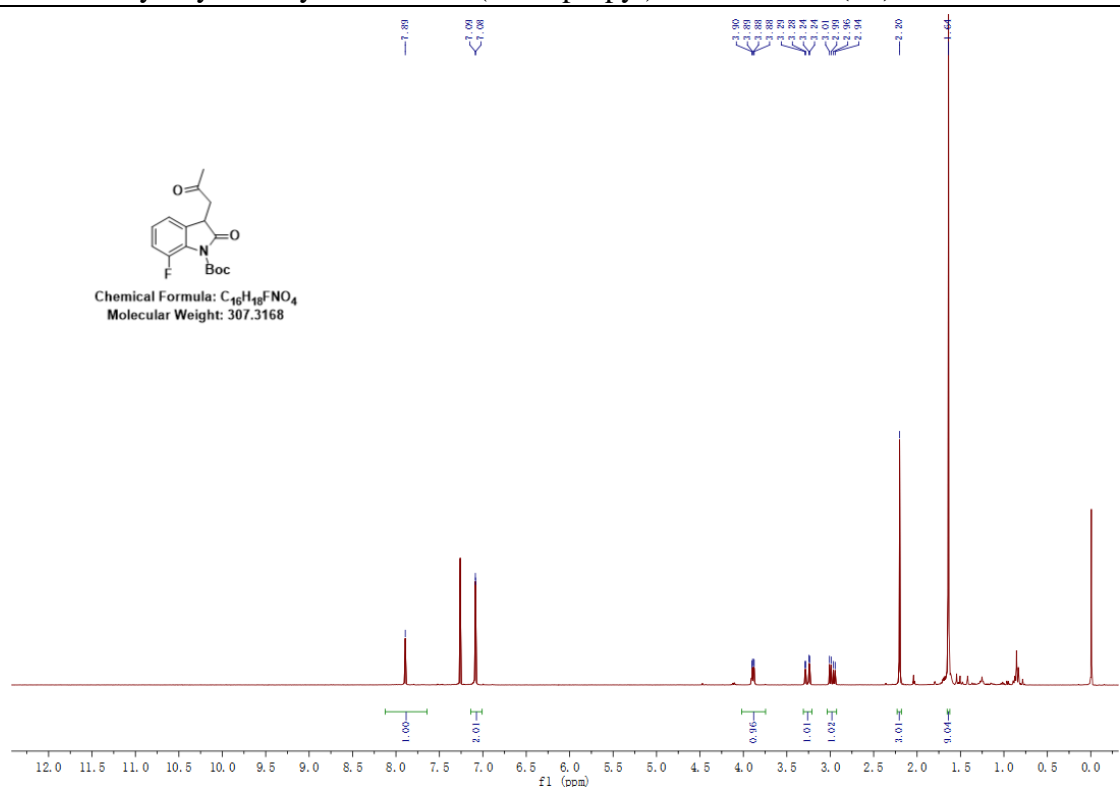

# 1-*tert*-Butyloxycarbonyl-6-chloro-3-(2-oxopropyl)indolin-2-one (**1i**)

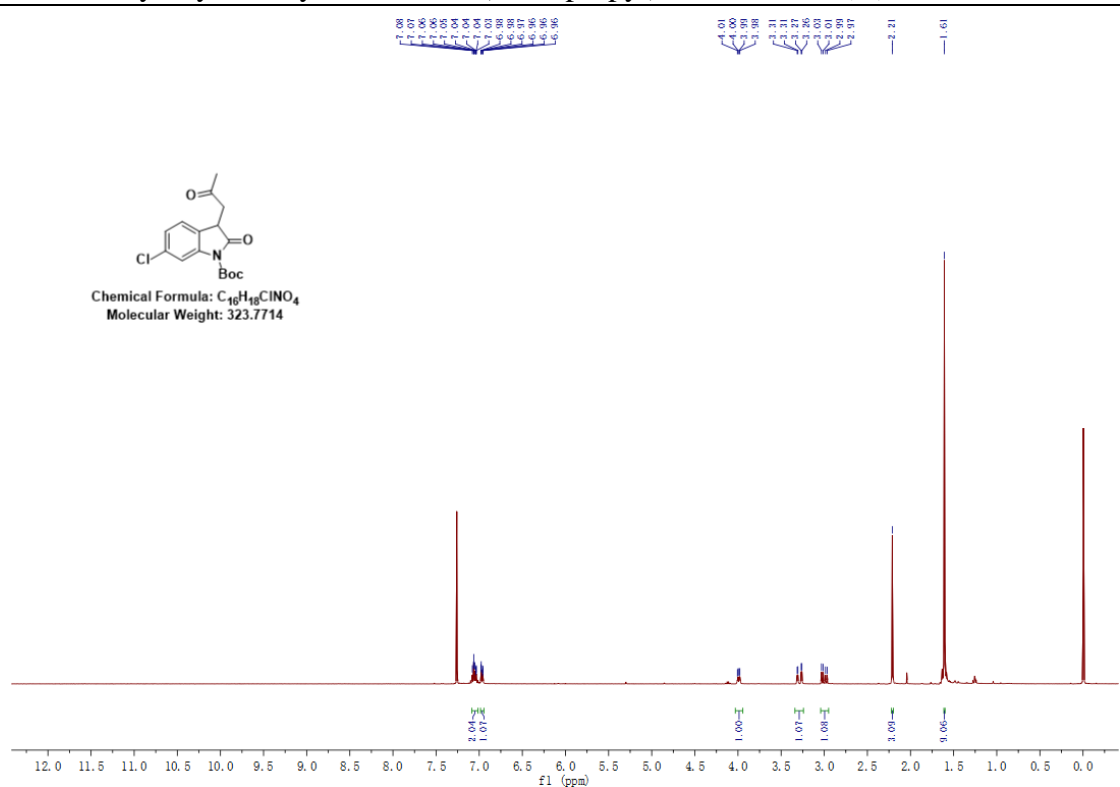



# 1-*tert*-Butyloxycarbonyl-6-bromo-3-(2-oxopropyl)indolin-2-one (**1j**)

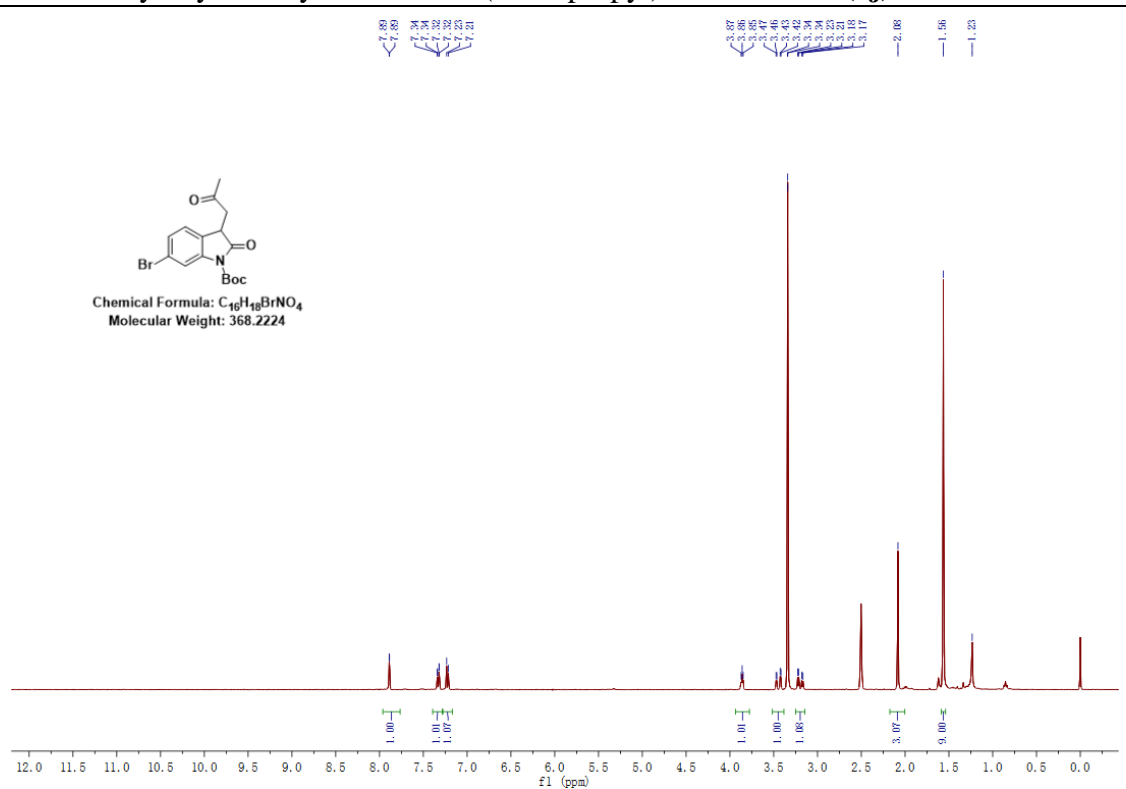

# 1-Acetyl-3-(2-oxopropyl)indolin-2-one (**1k**)

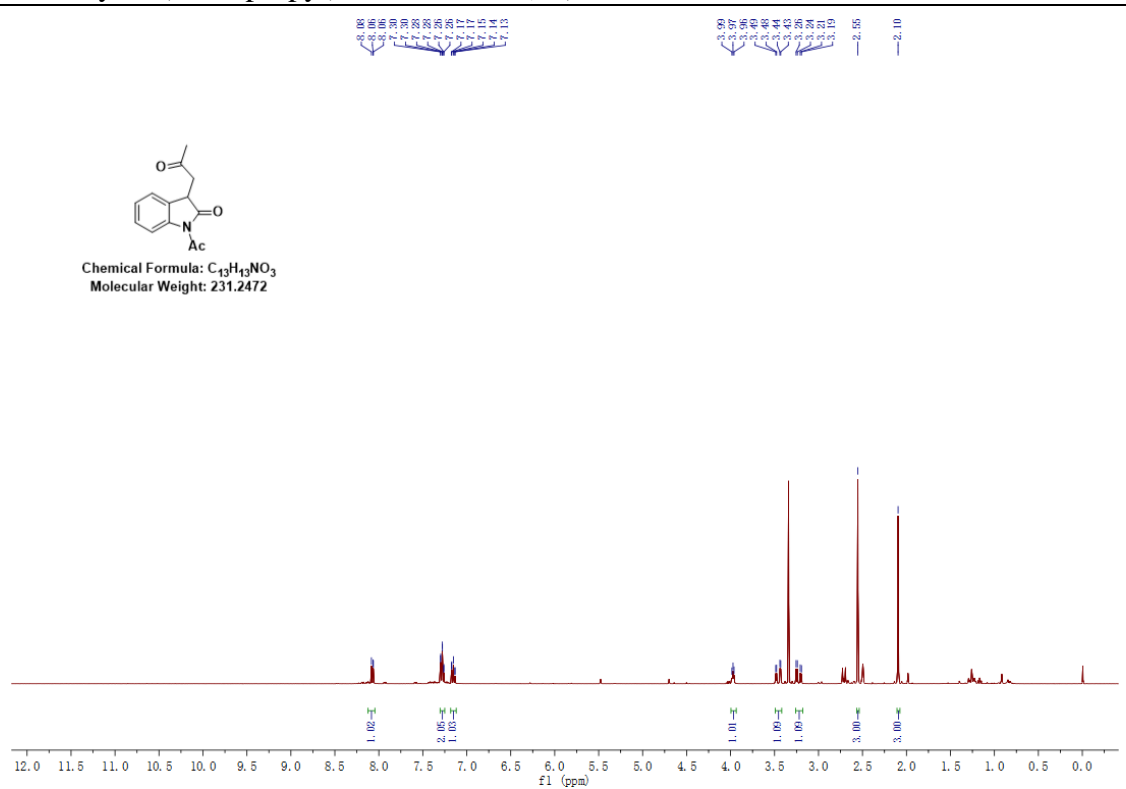

# 1-Acetyl-5-methyl-3-(2-oxopropyl)indolin-2-one (**1l**)

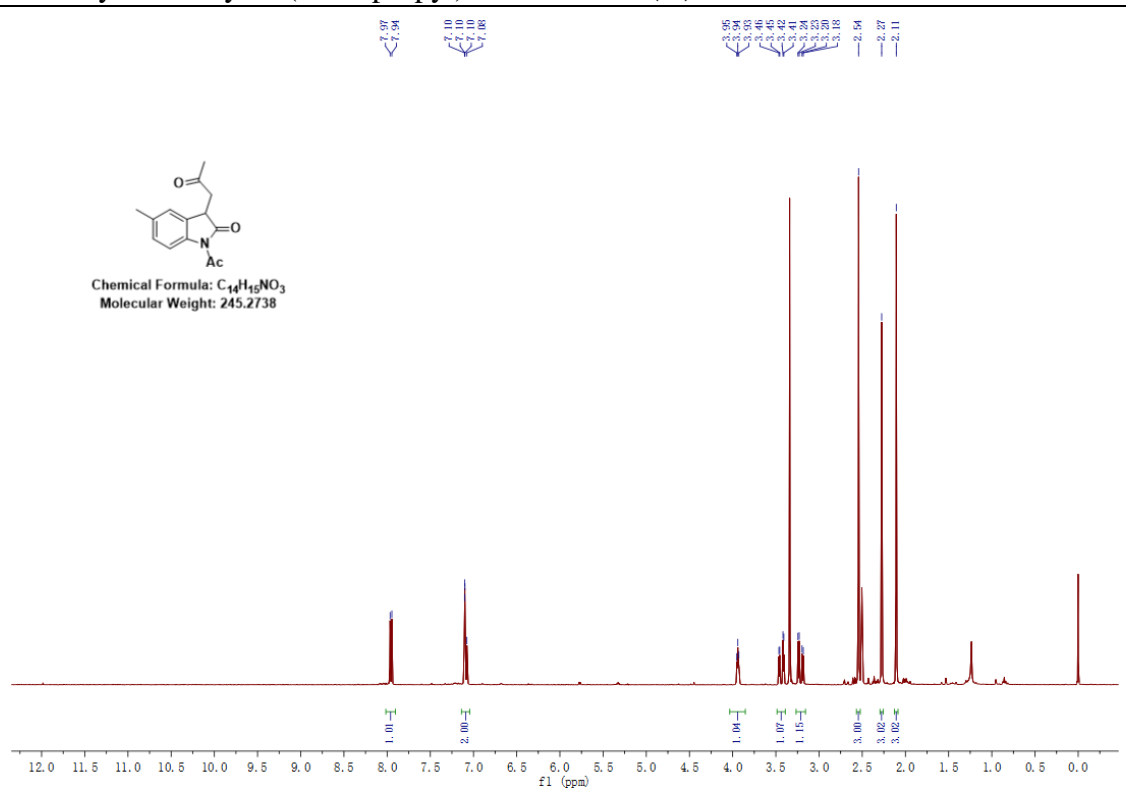

# 1-Acetyl-5-methoxy-3-(2-oxopropyl)indolin-2-one (**1m**)

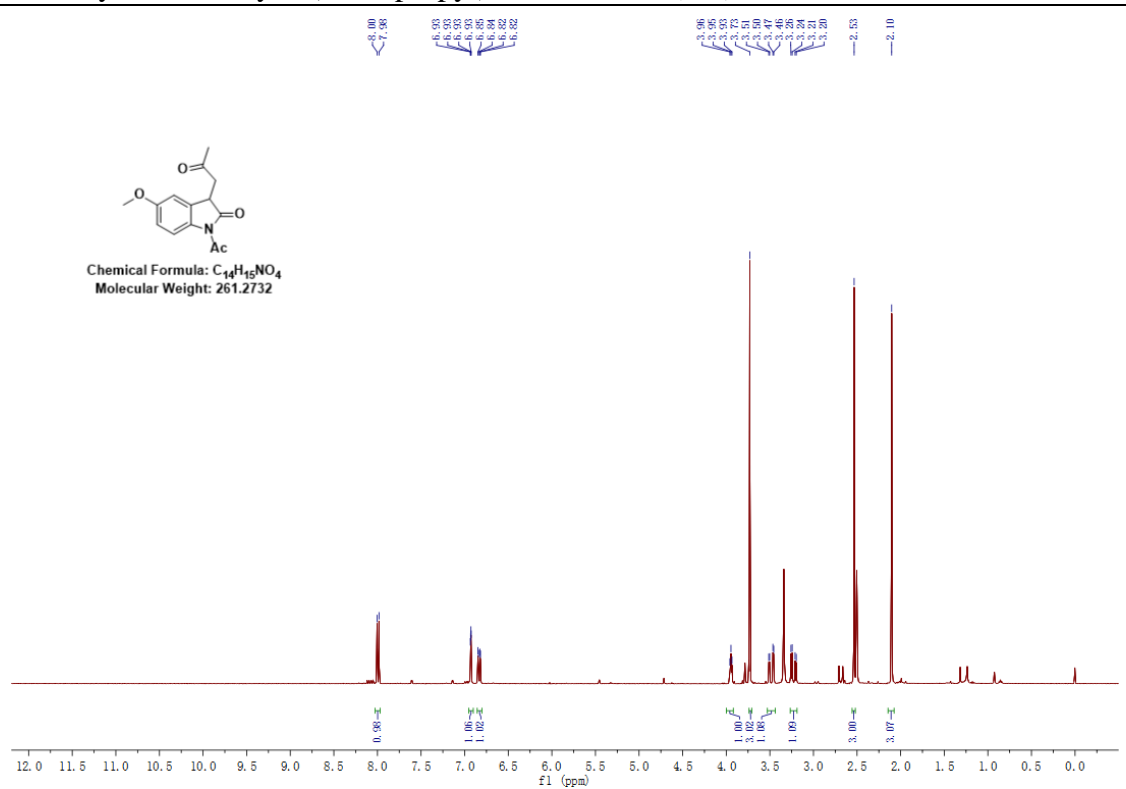

### 1-Acetyl-5-fluoro-3-(2-oxopropyl)indolin-2-one (**1n**)

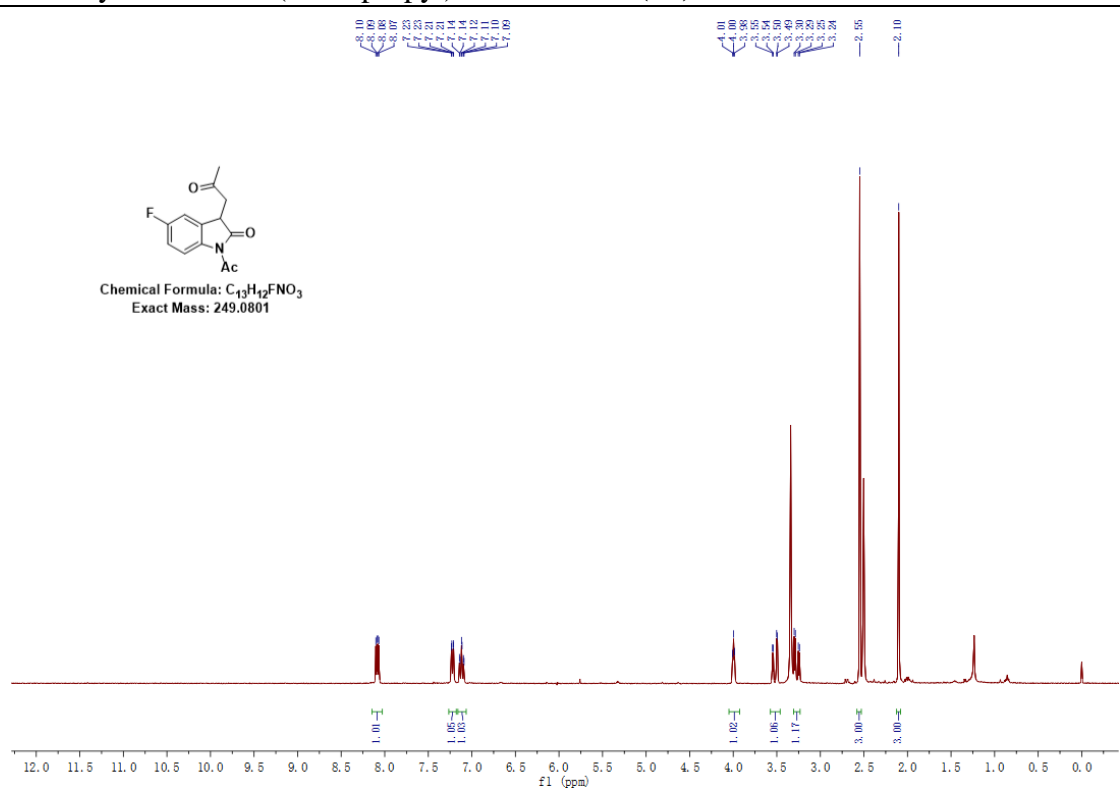

### 1-Acetyl-7-fluoro-3-(2-oxopropyl)indolin-2-one (**1o**)

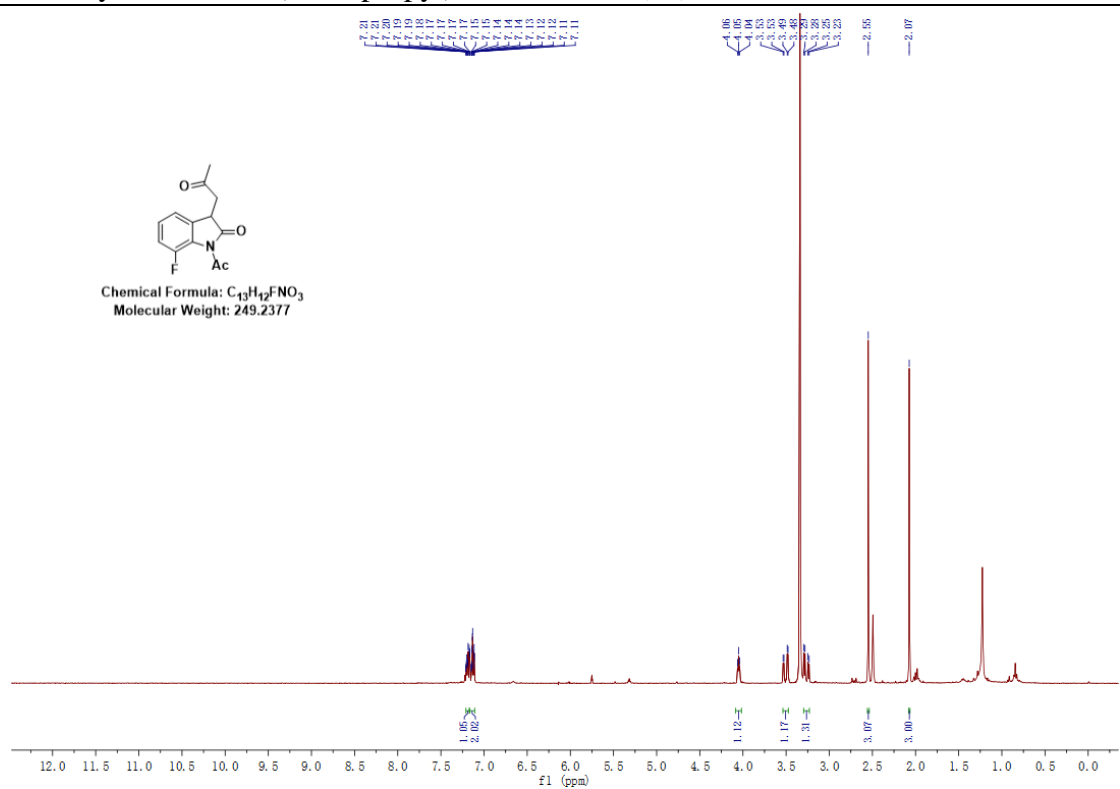

(1*S*,2*R*,3*S*,4*R*)-*tert*-Butyl-2-acetamido-4-hydroxy-4-methyl-3-nitro-2'-oxospiro[cyclopentane-1,3'-indoline]-1'-carboxylate (**3a**)

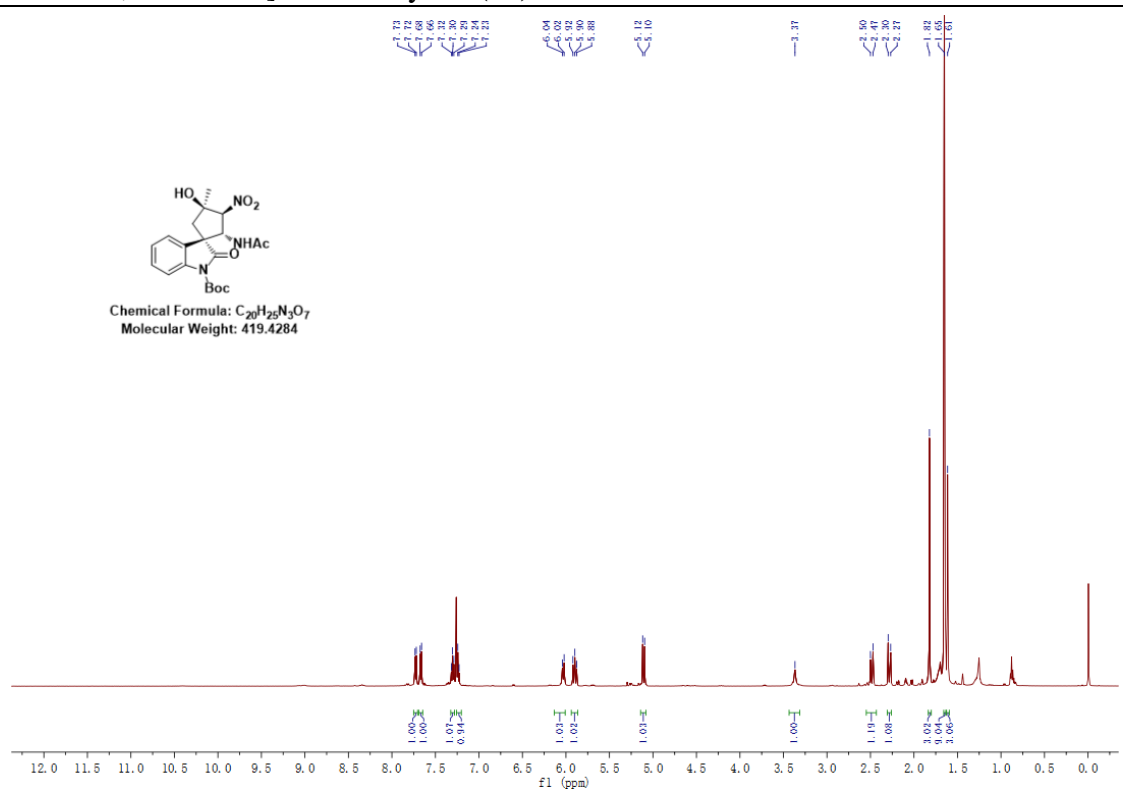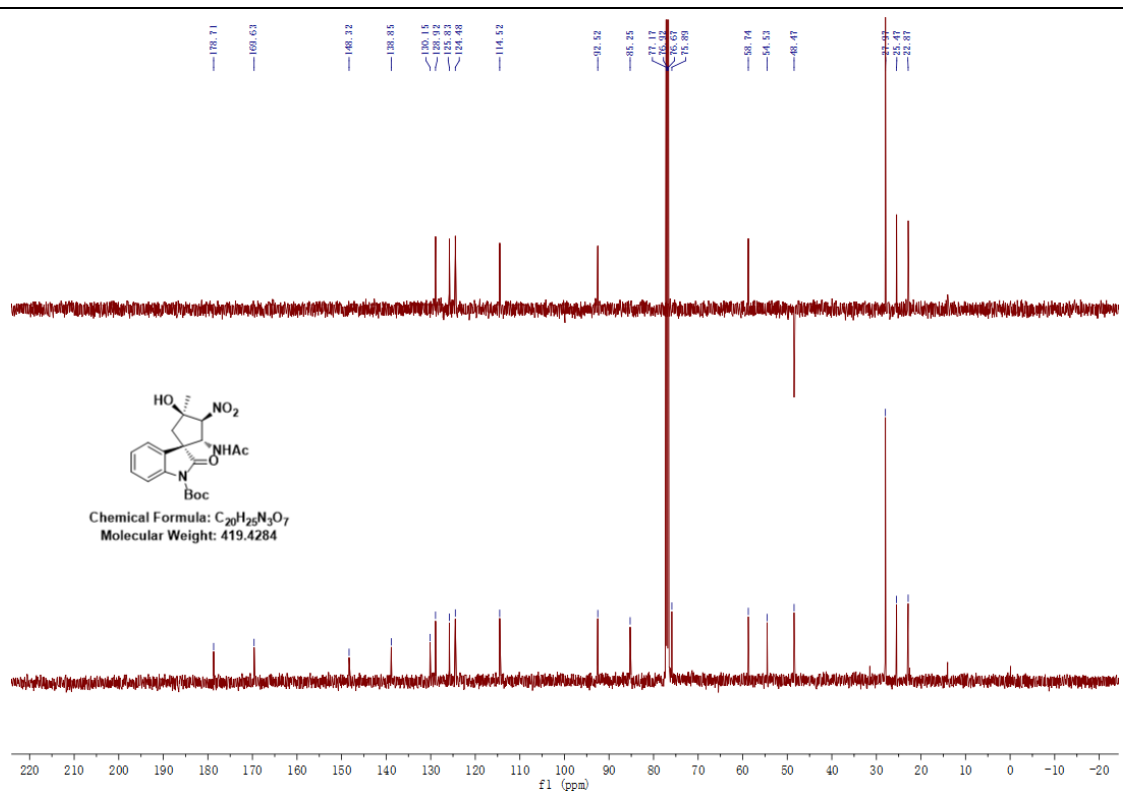

(1*S*,2*R*,3*S*,4*R*)-*tert*-Butyl-2-acetamido-4-hydroxy-4,5'-dimethyl-3-nitro-2'-oxospiro[cyclopentane-1,3'-indoline]-1'-carboxylate (**3b**)

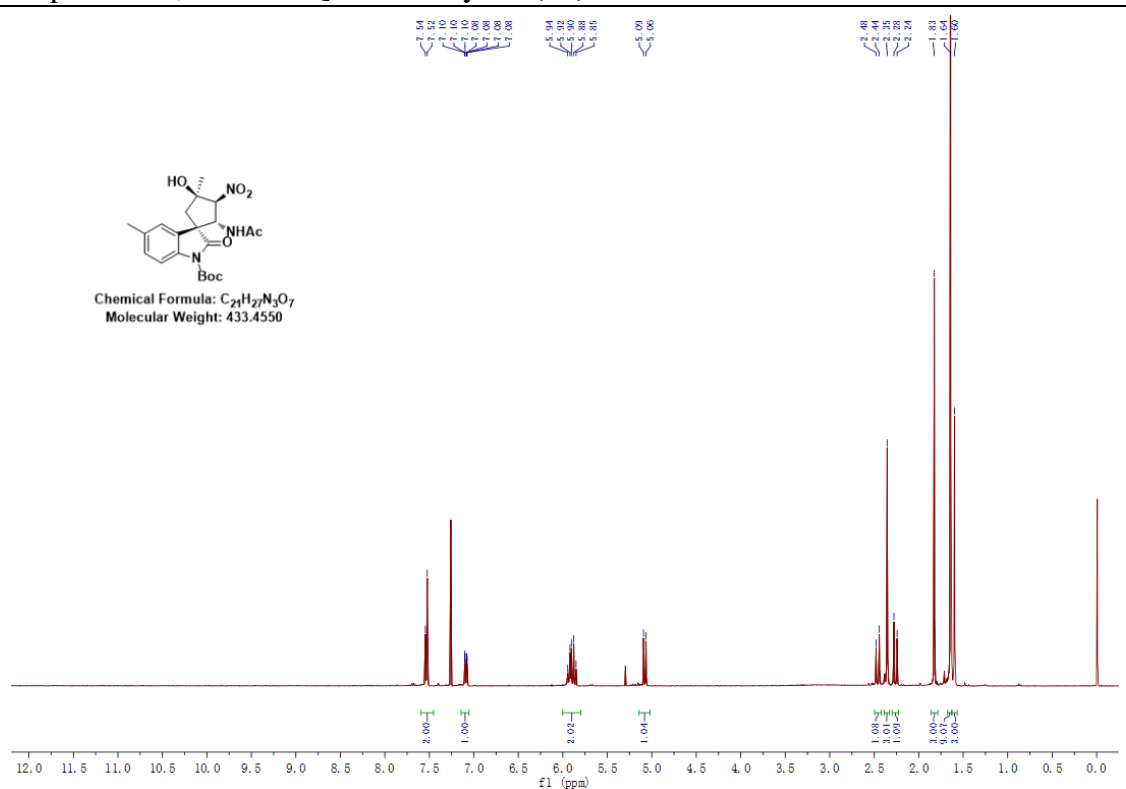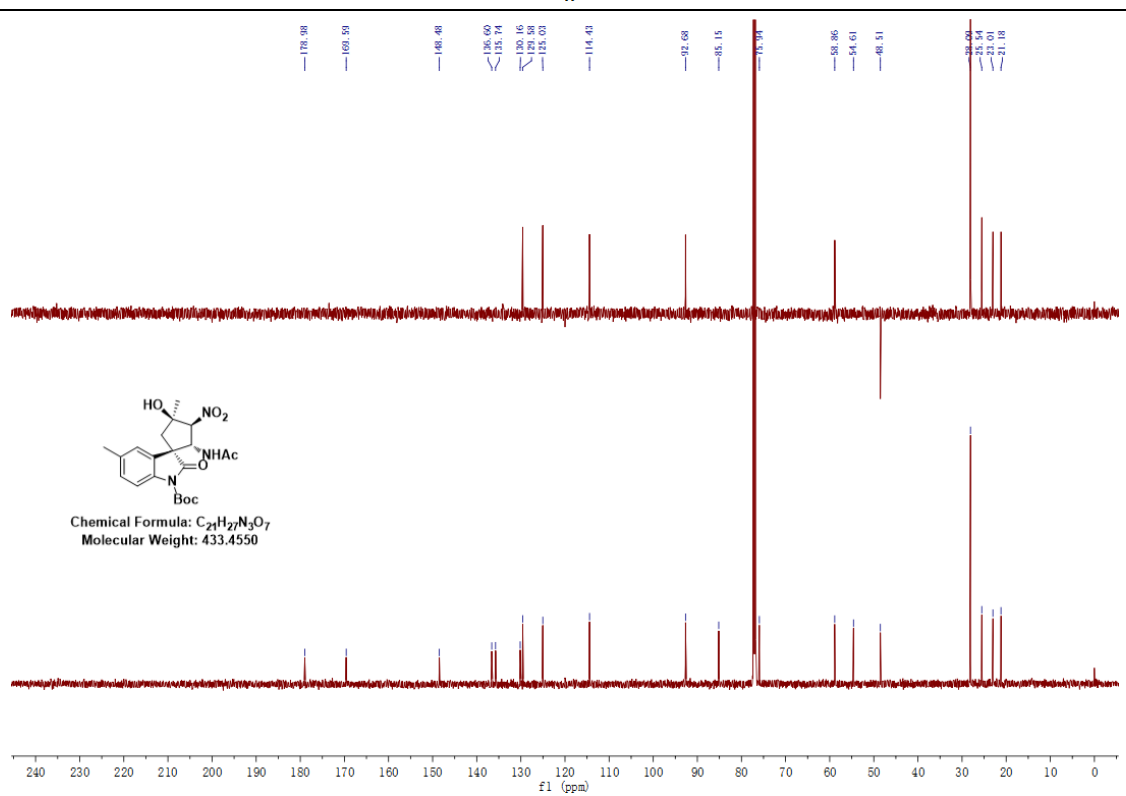

(1*S*,2*R*,3*S*,4*R*)-*tert*-Butyl-2-acetamido-4-hydroxy-4,5,7'-trimethyl-3-nitro-2'-oxospiro[cyclopentane-1,3'-indoline]-1'-carboxylate (**3c**)

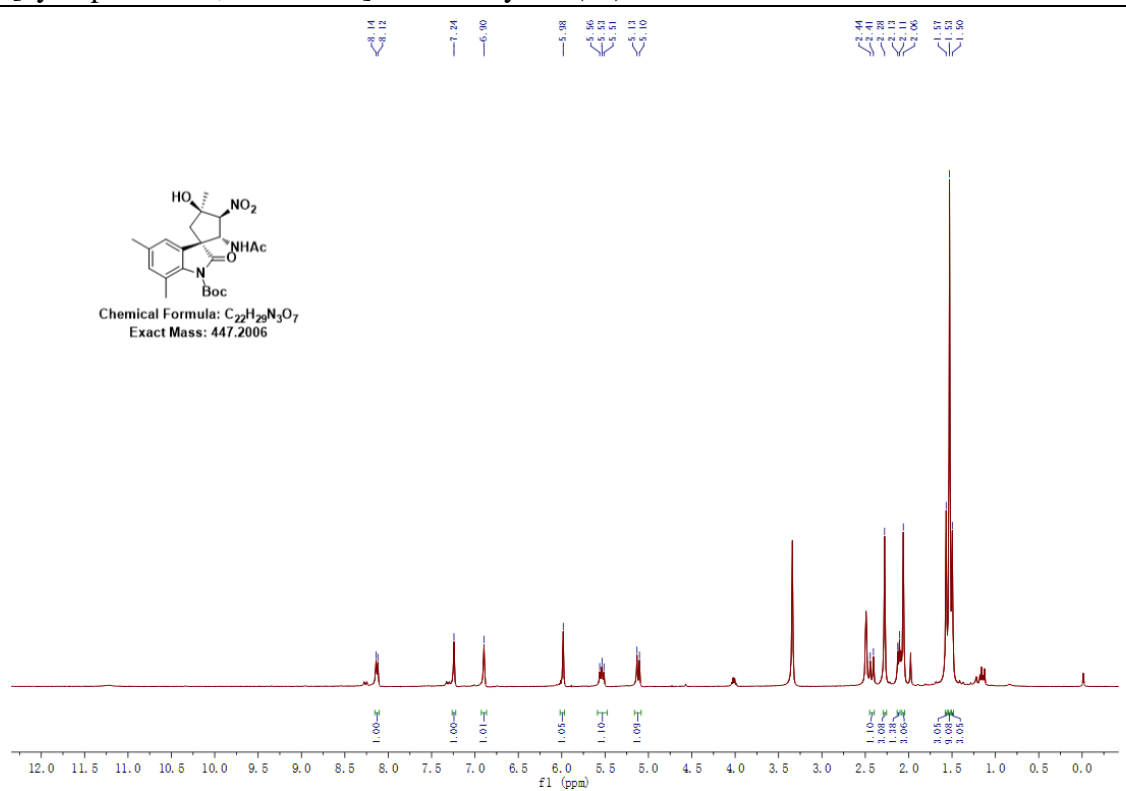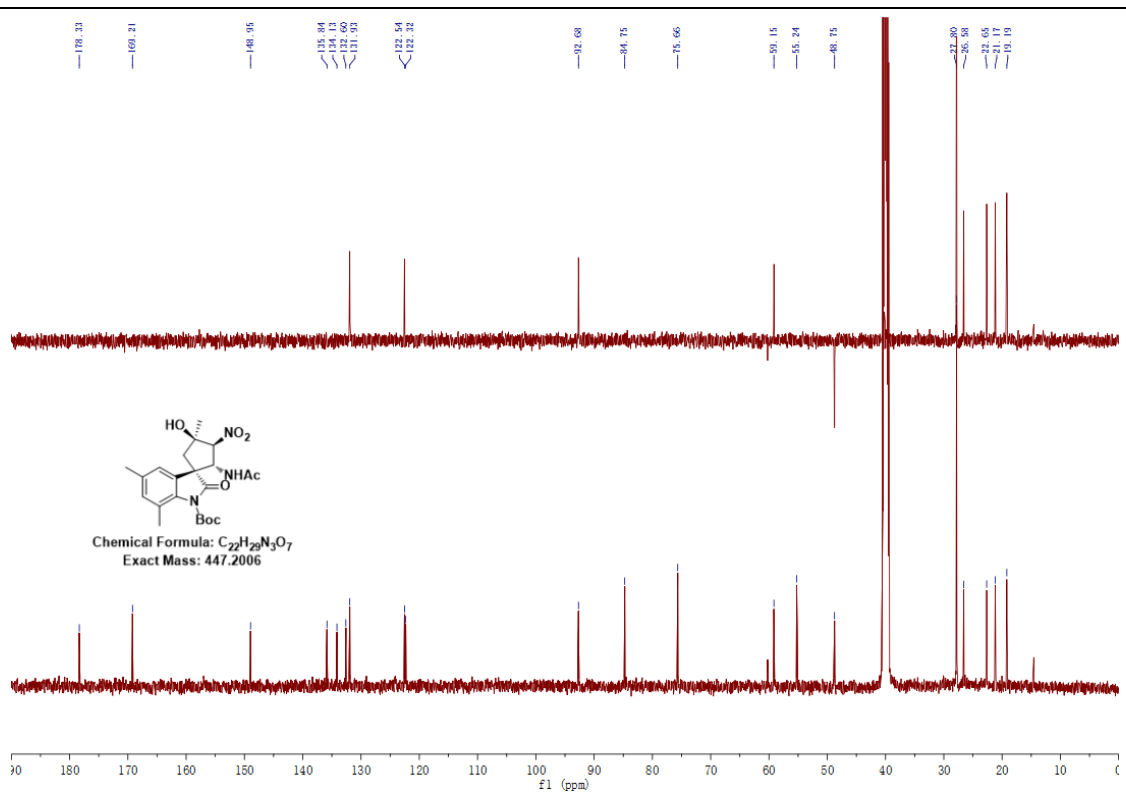

(1*S*,2*R*,3*S*,4*R*)-*tert*-Butyl-2-acetamido-4-hydroxy-5'-methoxy-4-methyl-3-nitro-2'-oxo spiro[cyclopentane-1,3'-indoline]-1'-carboxylate (**3d**)

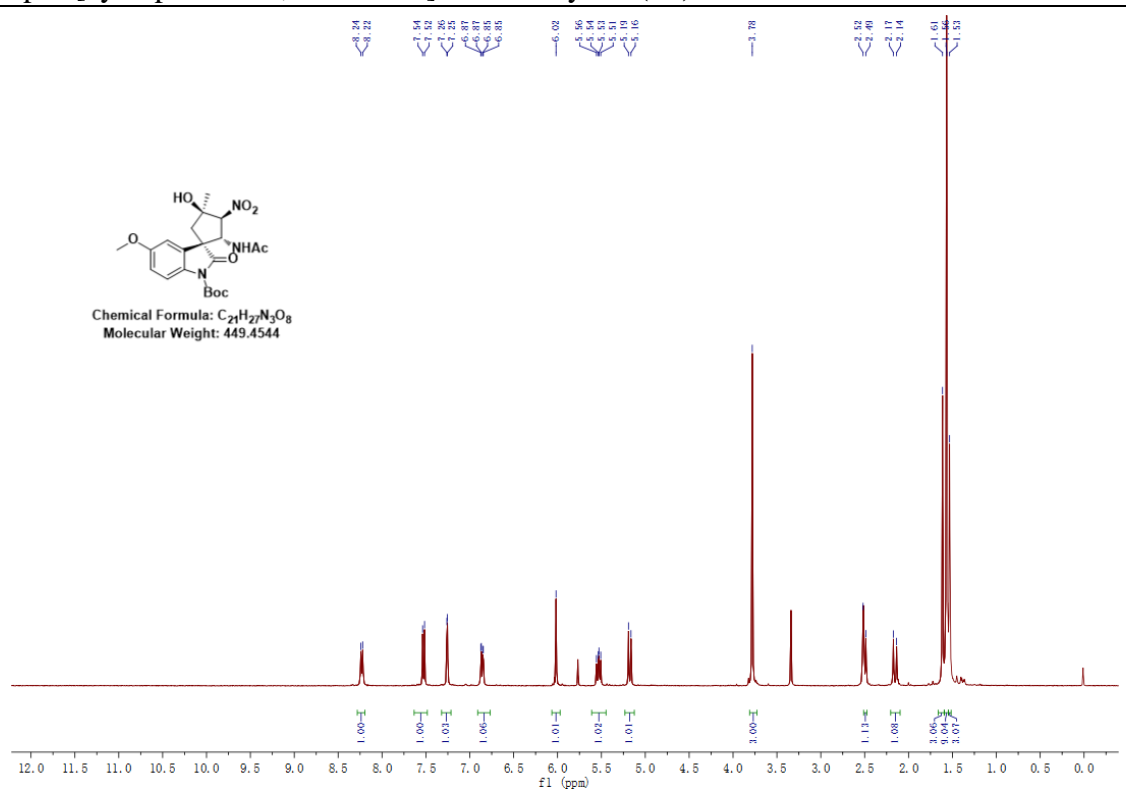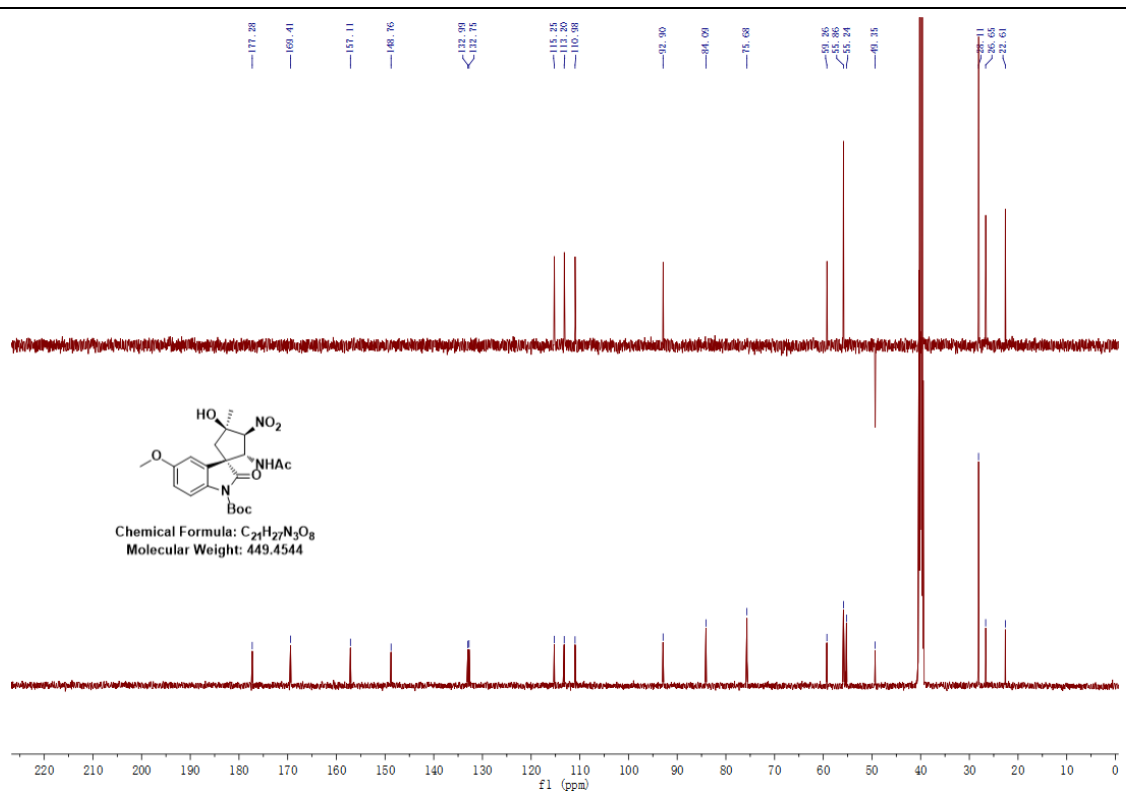

(1*S*,2*R*,3*S*,4*R*)-*tert*-Butyl-2-acetamido-4-hydroxy-5'-trifluoromethoxy-4-methyl-3-nitro-*o*-2'-oxospiro[cyclopentane-1,3'-indoline]-1'-carboxylate (**3e**)

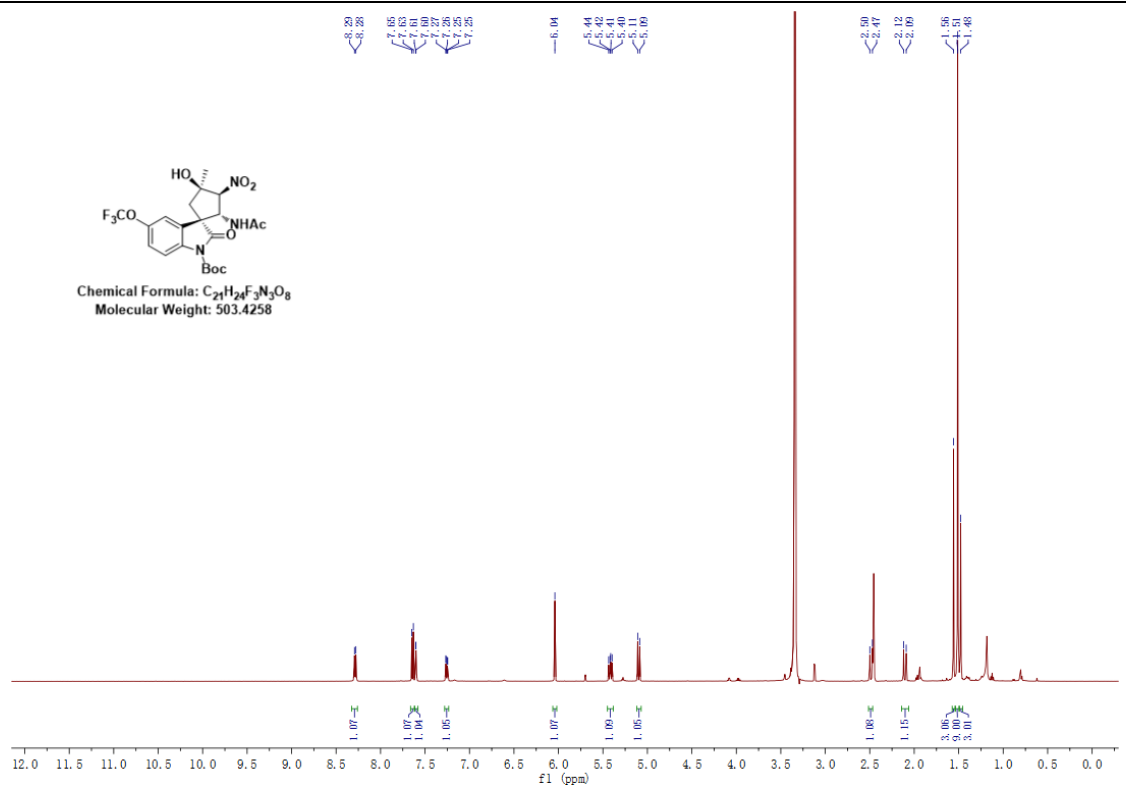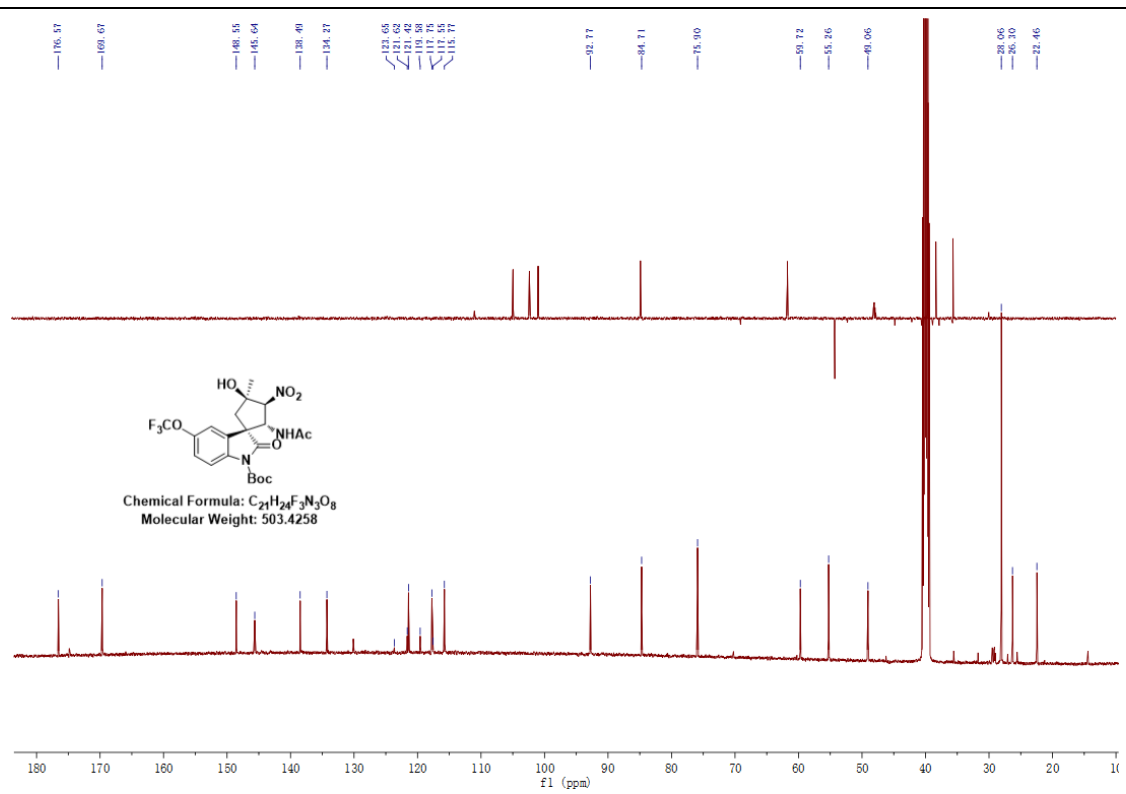



(1*S*,2*R*,3*S*,4*R*)-*tert*-Butyl-2-acetamido-4-hydroxy-5'-fluoro-4-methyl-3-nitro-2'-oxospiro[cyclopentane-1,3'-indoline]-1'-carboxylate (**3f**)

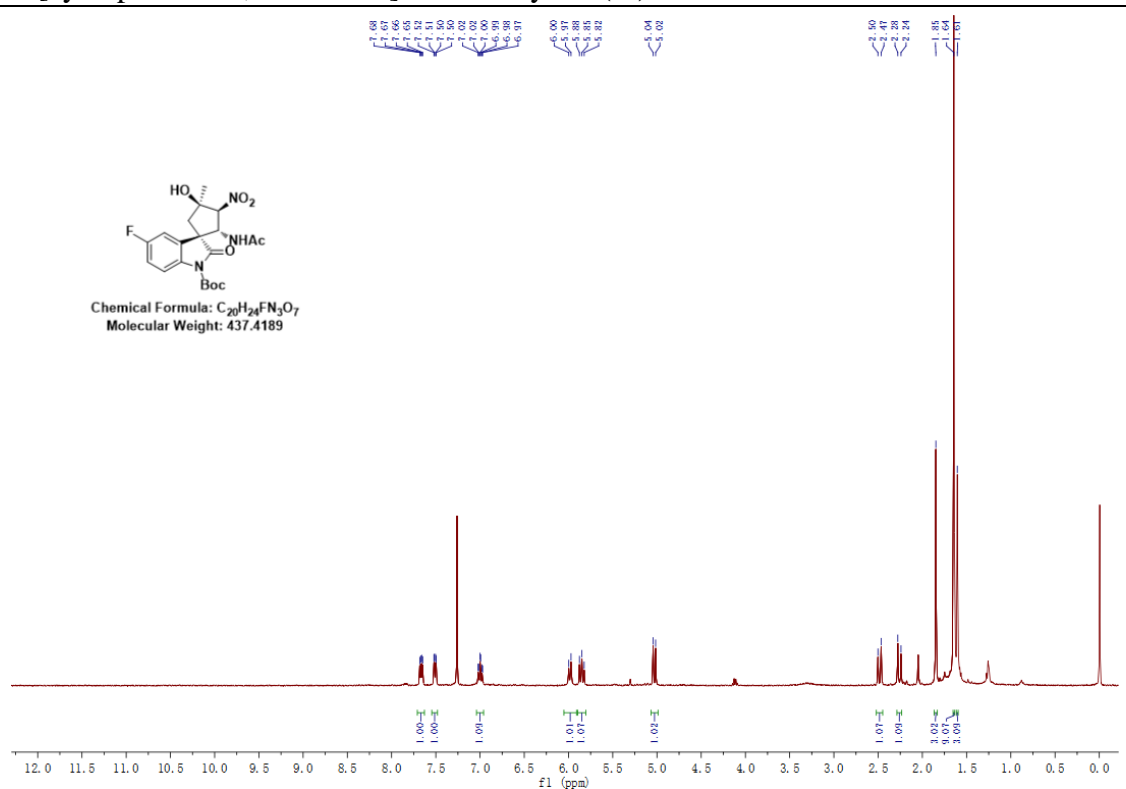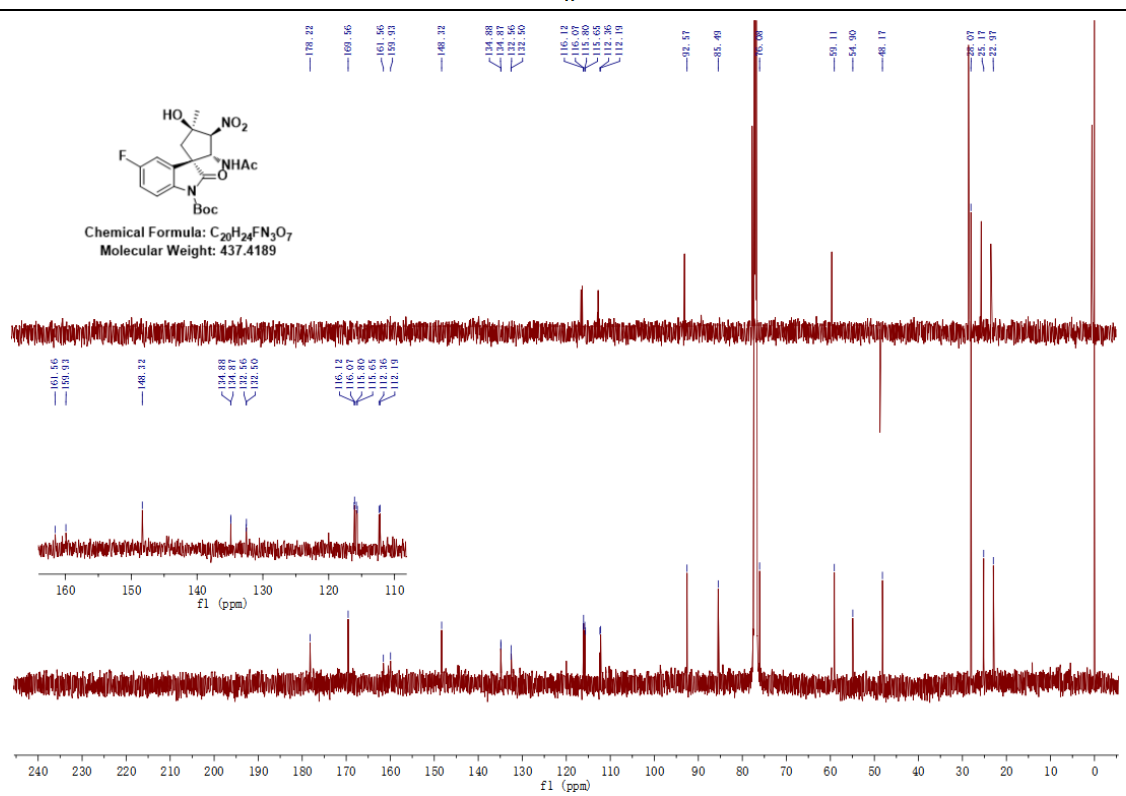

(1*S*,2*R*,3*S*,4*R*)-*tert*-Butyl-2-acetamido-4-hydroxy-5'-chloro-4-methyl-3-nitro-2'-oxospiro[cyclopentane-1,3'-indoline]-1'-carboxylate (**3g**)

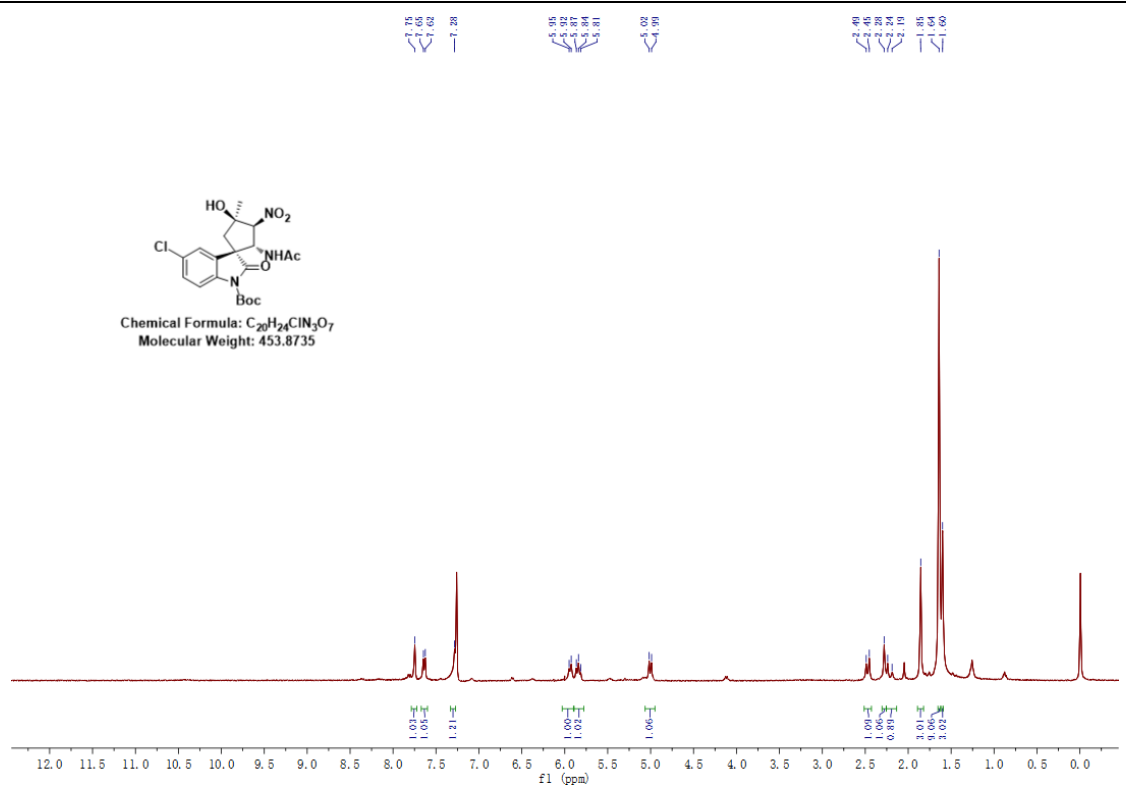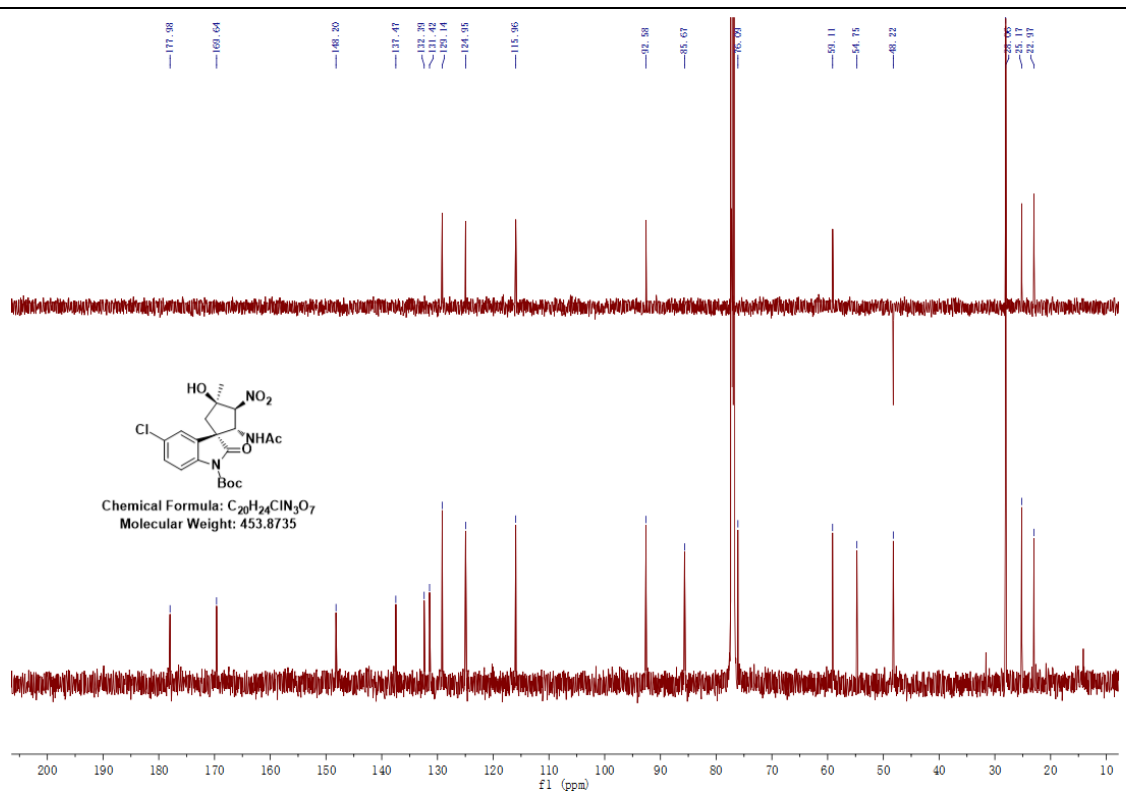

(1*S*,2*R*,3*S*,4*R*)-*tert*-Butyl-2-acetamido-4-hydroxy-7'-fluoro-4-methyl-3-nitro-2'-oxospiro[cyclopentane-1,3'-indoline]-1'-carboxylate (**3h**)

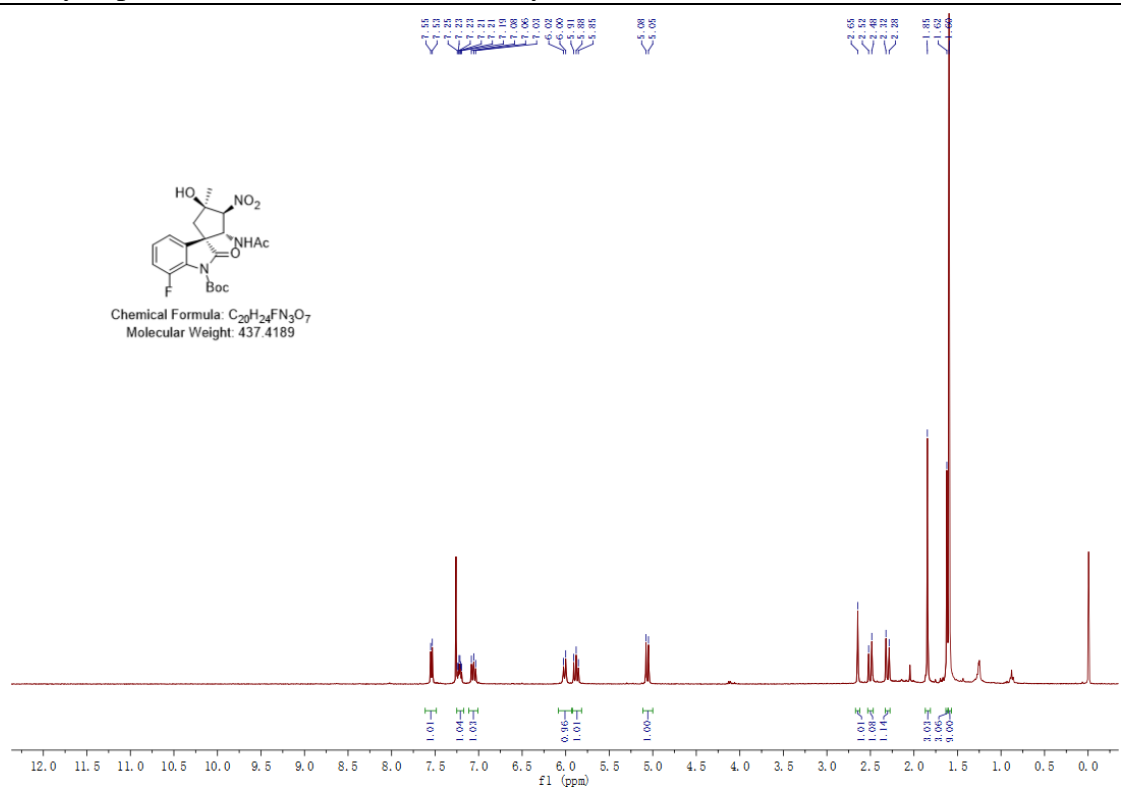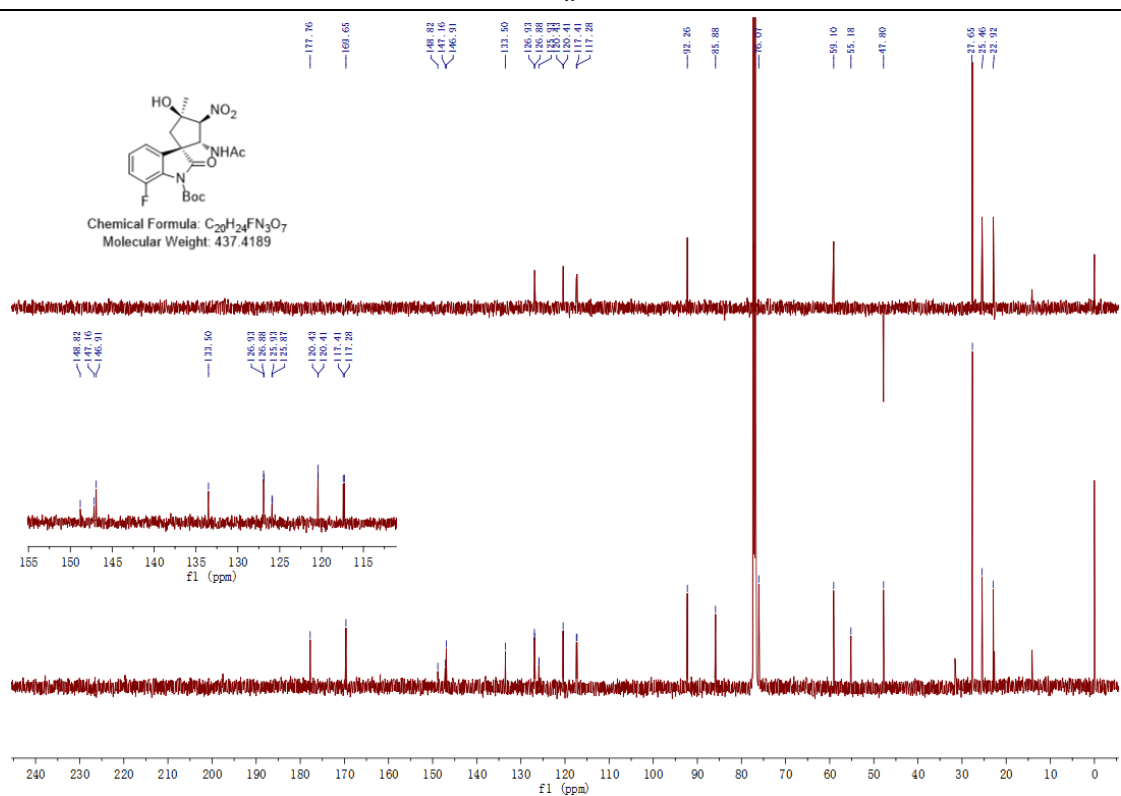

(1*S*,2*R*,3*S*,4*R*)-*tert*-Butyl-2-acetamido-4-hydroxy-6'-chloro-4-methyl-3-nitro-2'-oxospiro[cyclopentane-1,3'-indoline]-1'-carboxylate (**3i**)

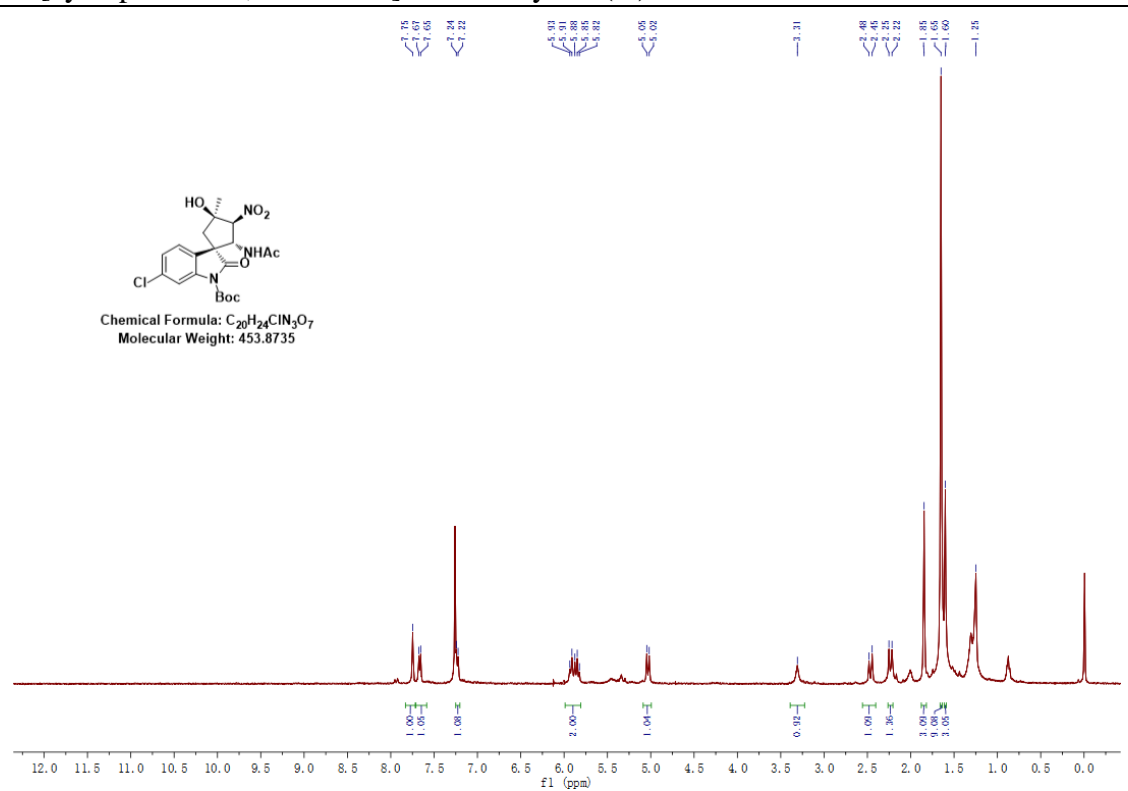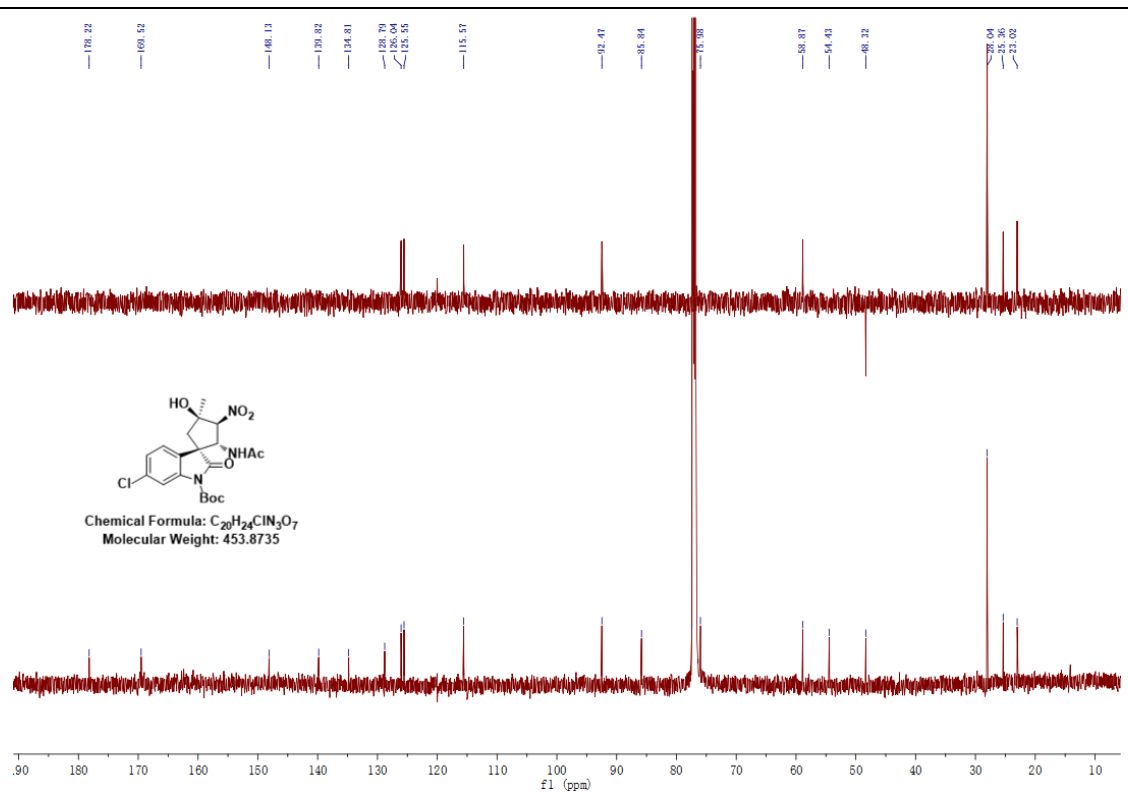

(1*S*,2*R*,3*S*,4*R*)-*tert*-Butyl-2-acetamido-4-hydroxy-6'-bromo-4-methyl-3-nitro-2'-oxospiro[cyclopentane-1,3'-indoline]-1'-carboxylate (**3j**)

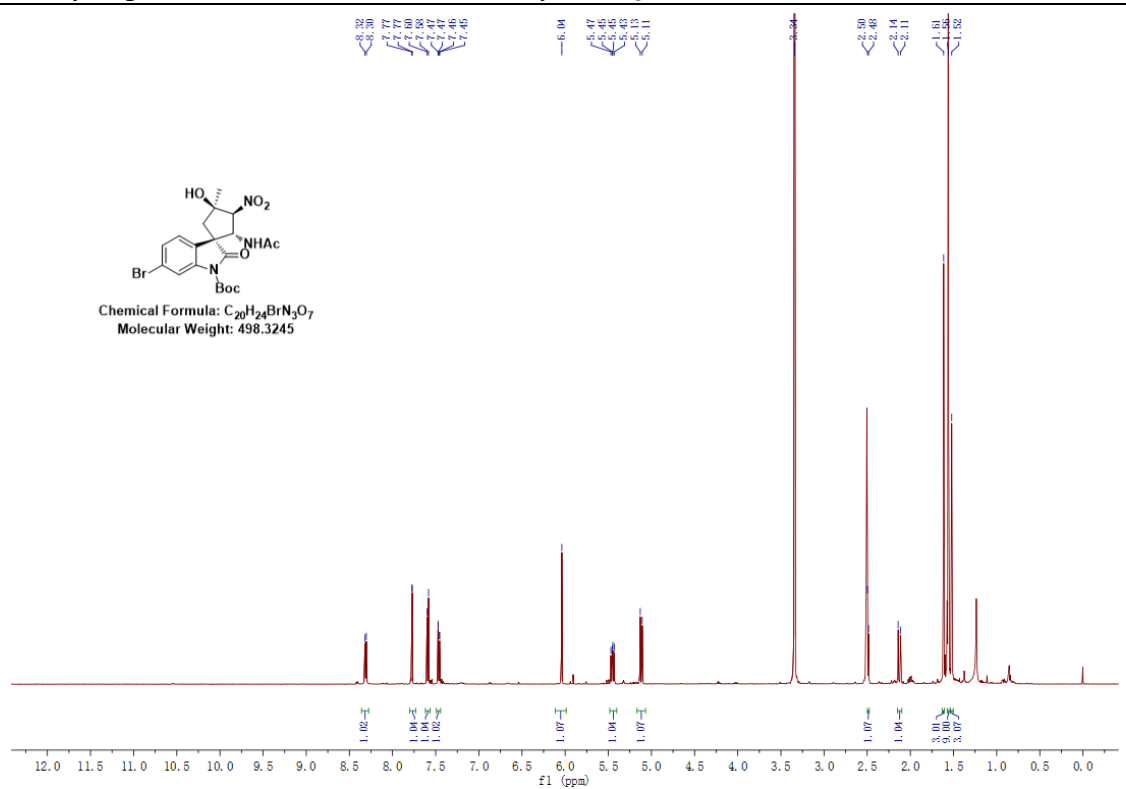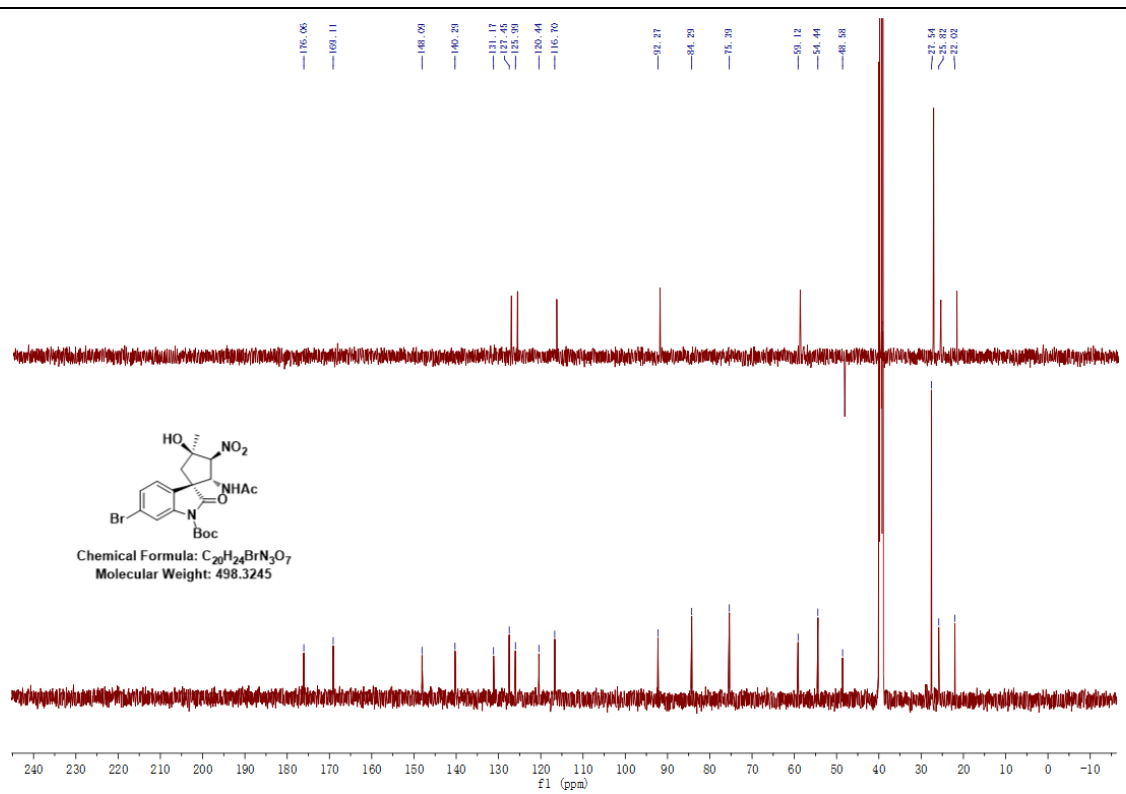

*N*-((1*S*,2*R*,3*S*,4*R*)-1'-Acetyl-3-hydroxy-3-methyl-4-nitro-2'-oxospiro[cyclopentane-1,3'-indolin]-5-yl)acetamide (**3k**)

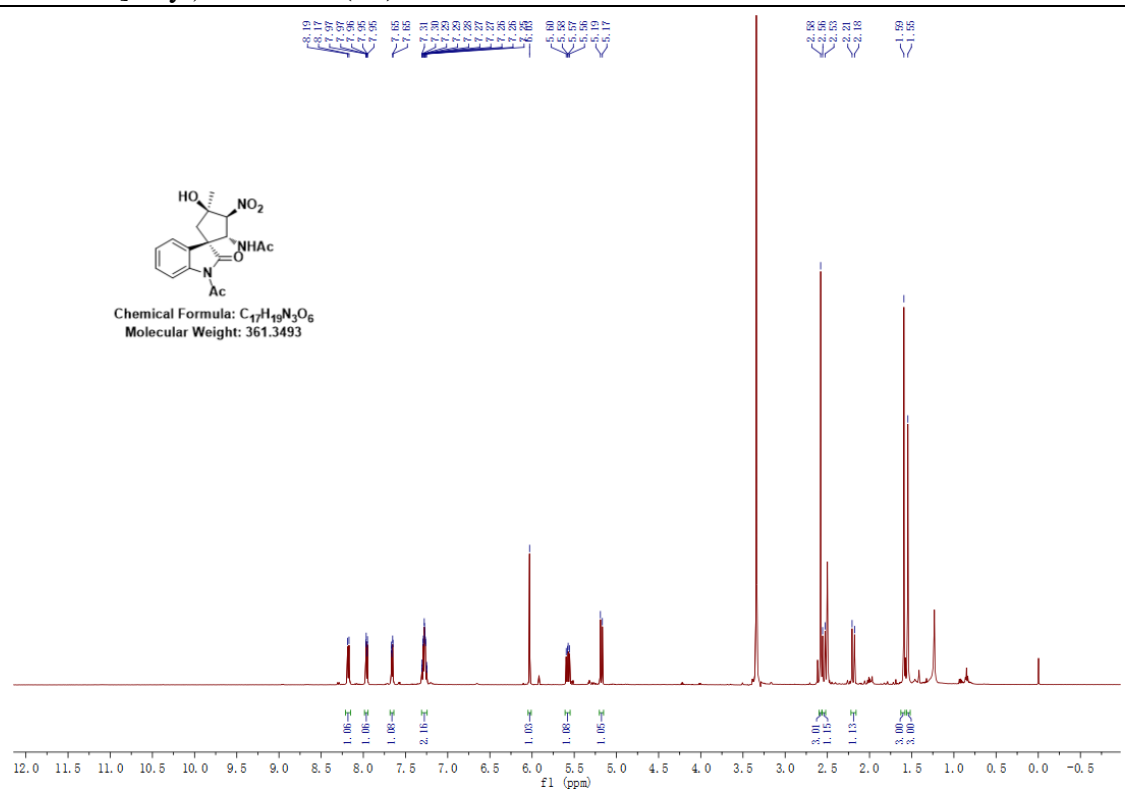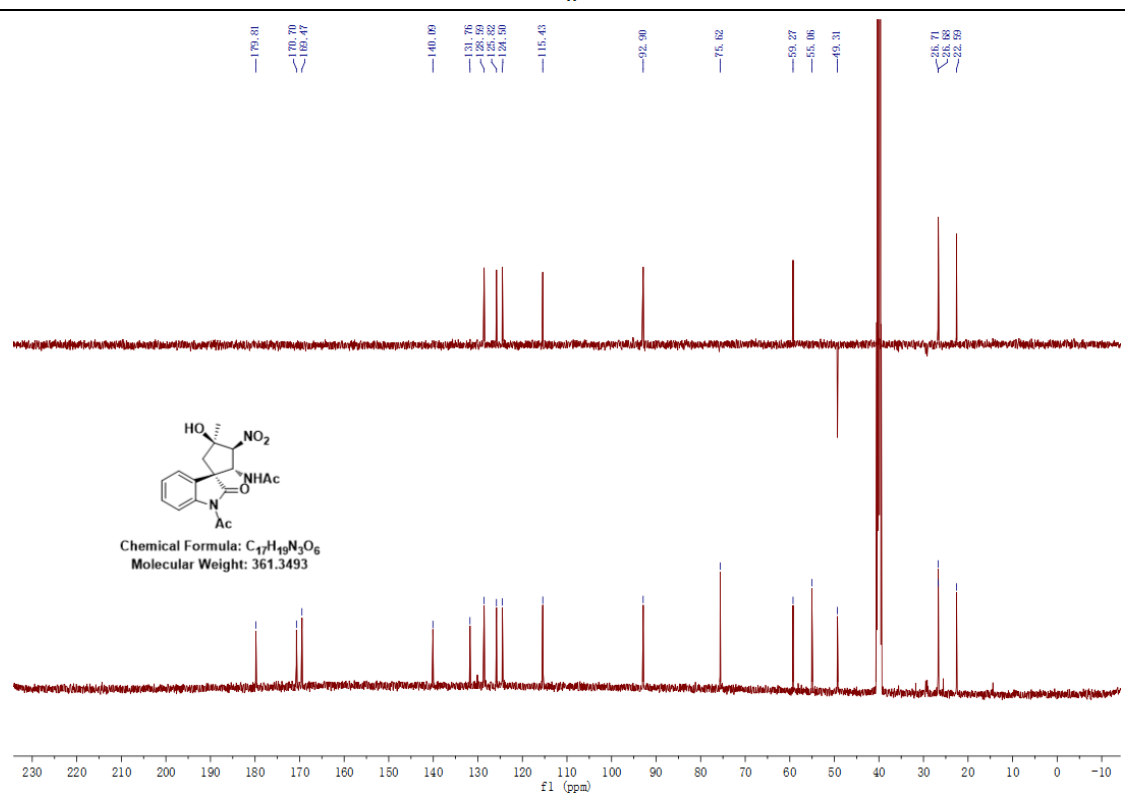

*N*-((1*S*,2*R*,3*S*,4*R*)-1'-Acetyl-3-hydroxy-3,5'-dimethyl-4-nitro-2'-oxospiro[cyclopentane-1,3'-indolin]-5-yl)acetamide (**3l**)

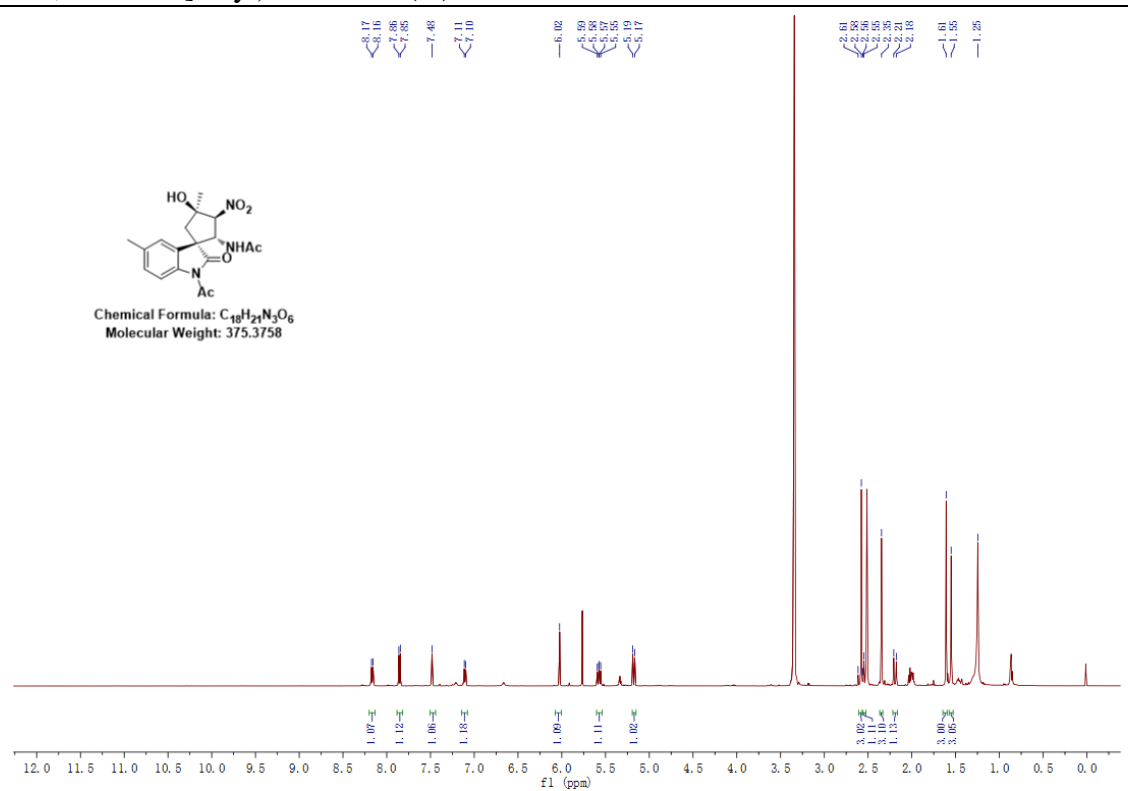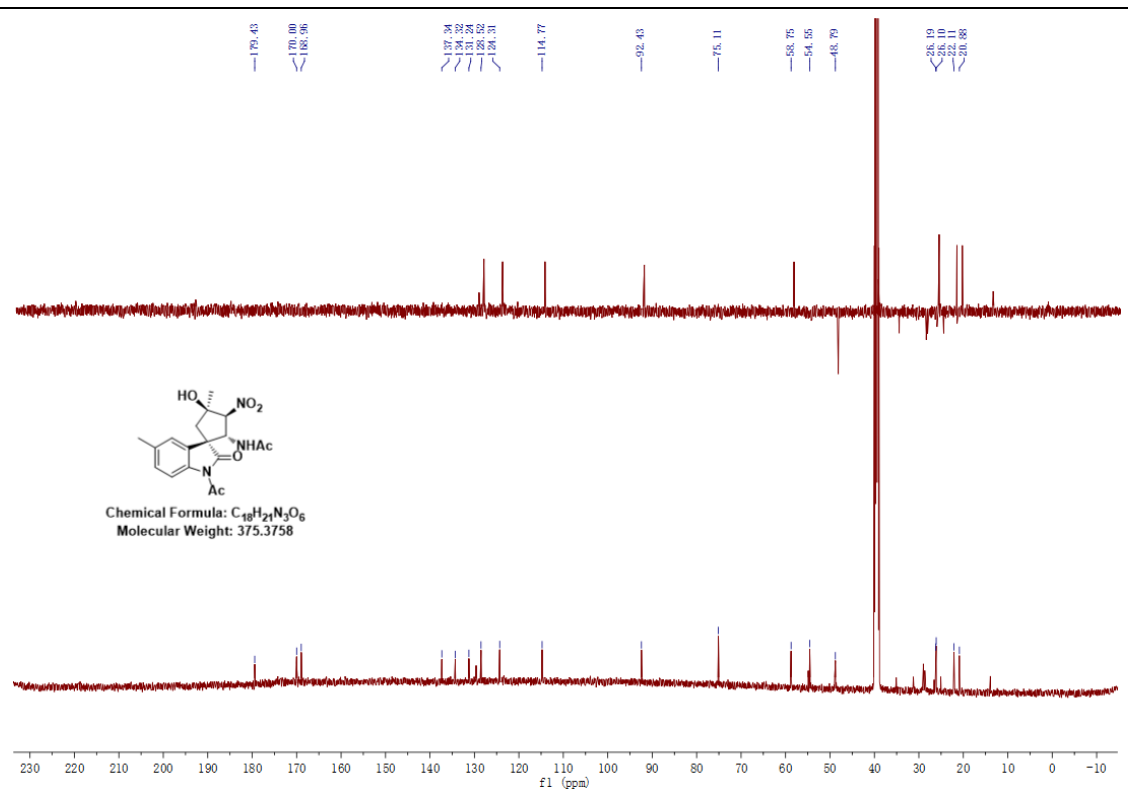

*N*-((1*S*,2*R*,3*S*,4*R*)-1'-Acetyl-3-hydroxy-5'-methoxy-3-methyl-4-nitro-2'-oxospiro[cyclopentane-1,3'-indolin]-5-yl)acetamide (**3m**)

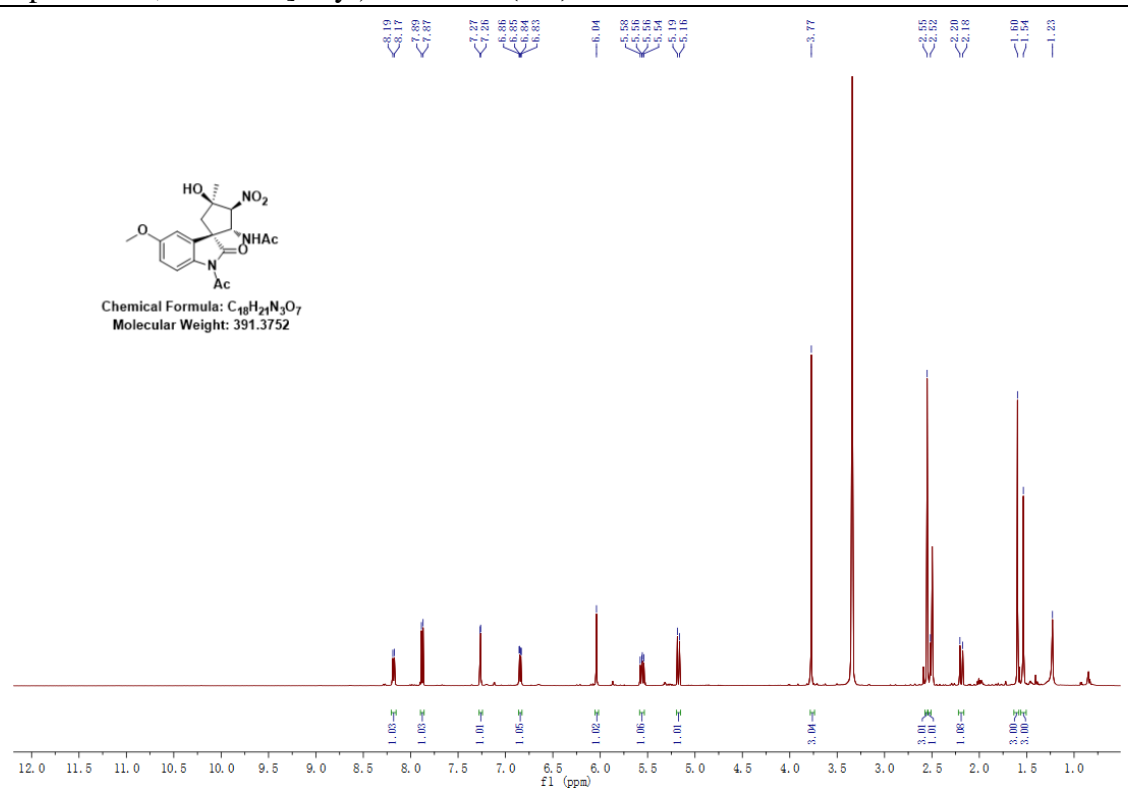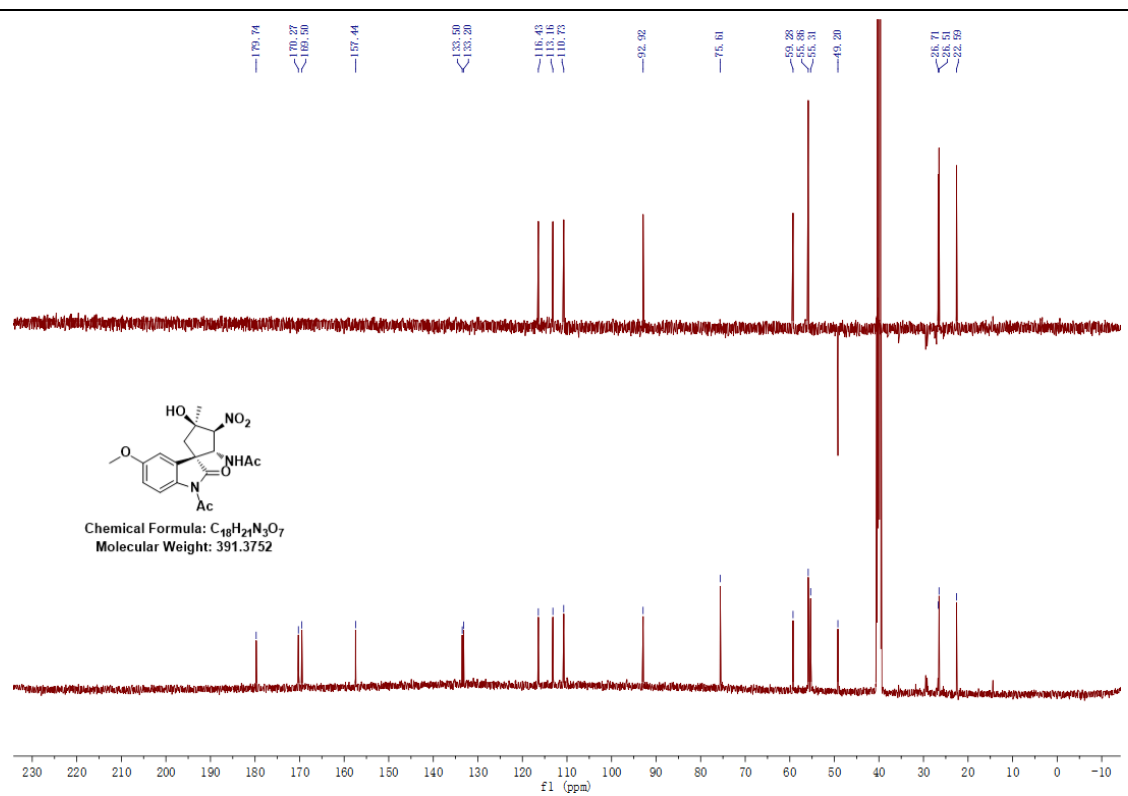



*N*-((1*S*,2*R*,3*S*,4*R*)-1'-Acetyl-5'-fluoro-3-hydroxy-3-methyl-4-nitro-2'-oxospiro[cyclopentane-1,3'-indolin]-5-yl)acetamide (**3n**)

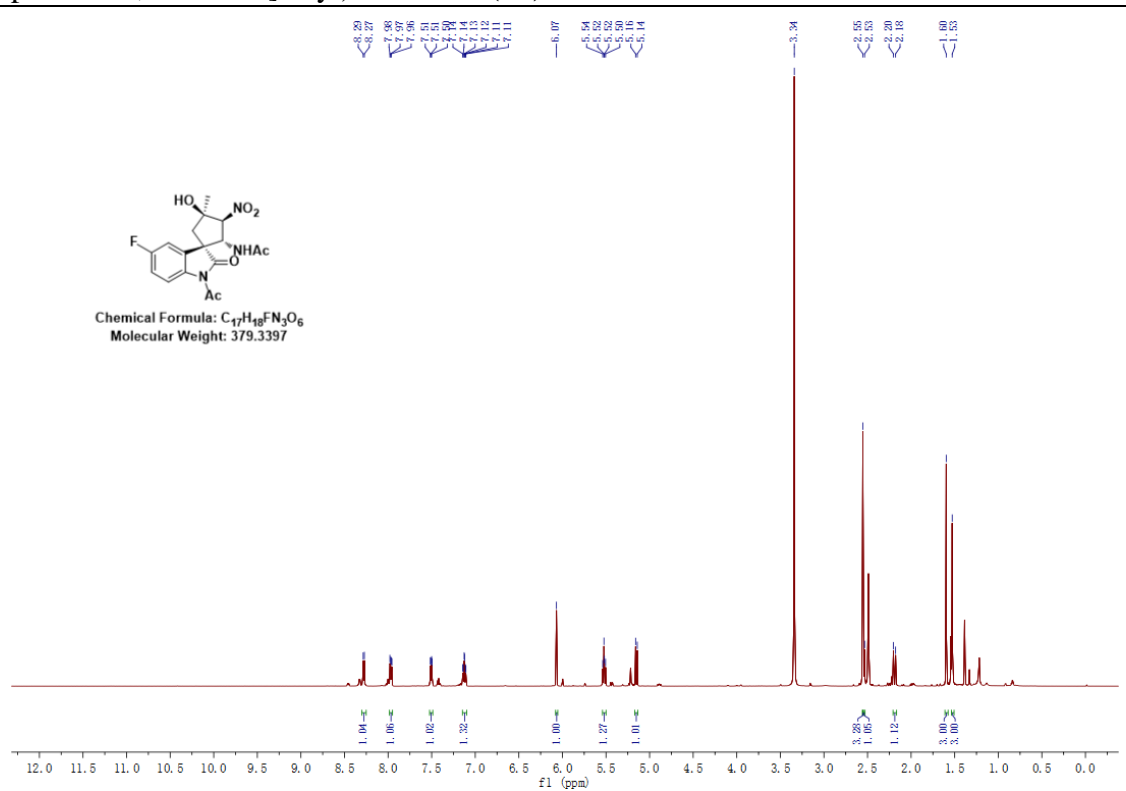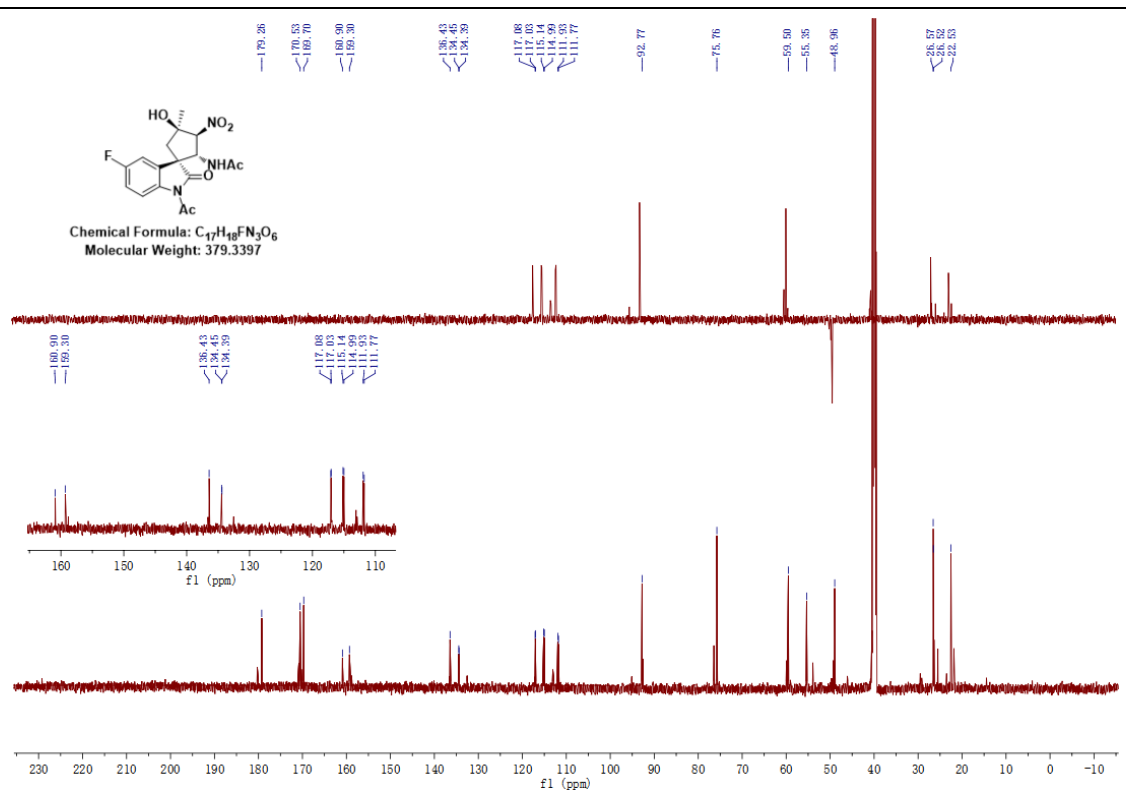

*N*-((1*S*,2*R*,3*S*,4*R*)-1'-Acetyl-7'-fluoro-3-hydroxy-3-methyl-4-nitro-2'-oxospiro[cyclopentane-1,3'-indolin]-5-yl)acetamide (**30**)

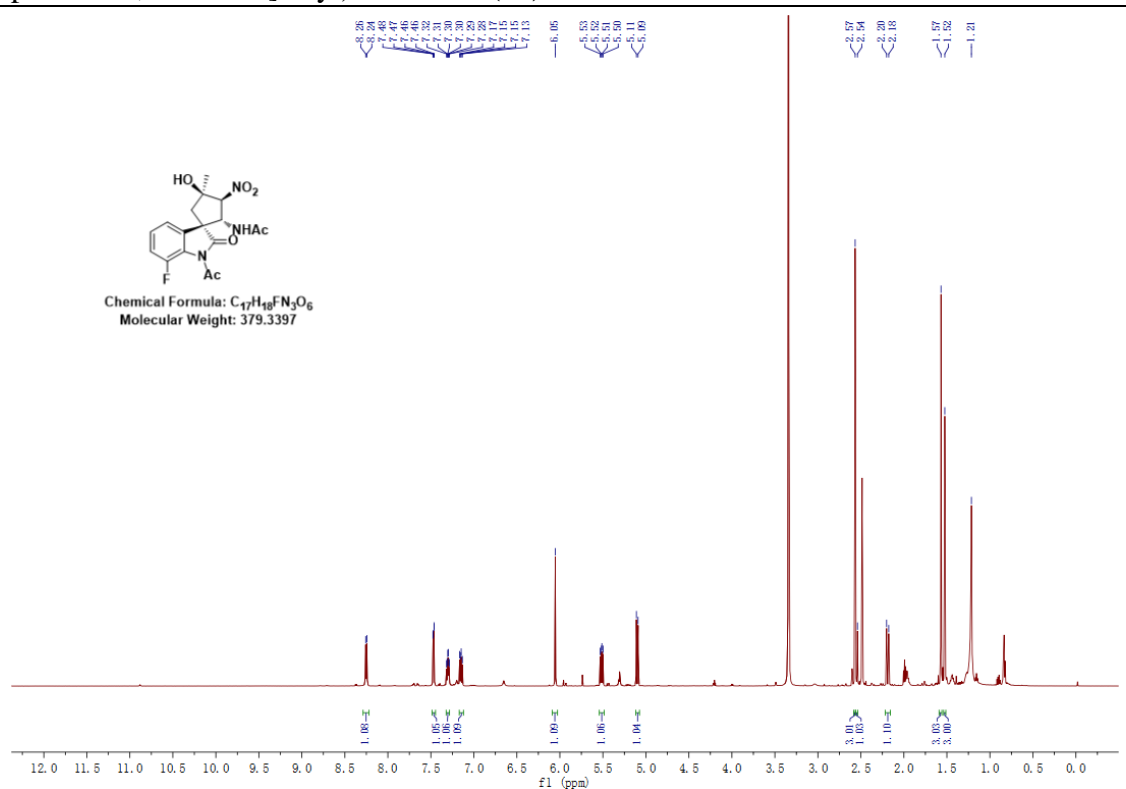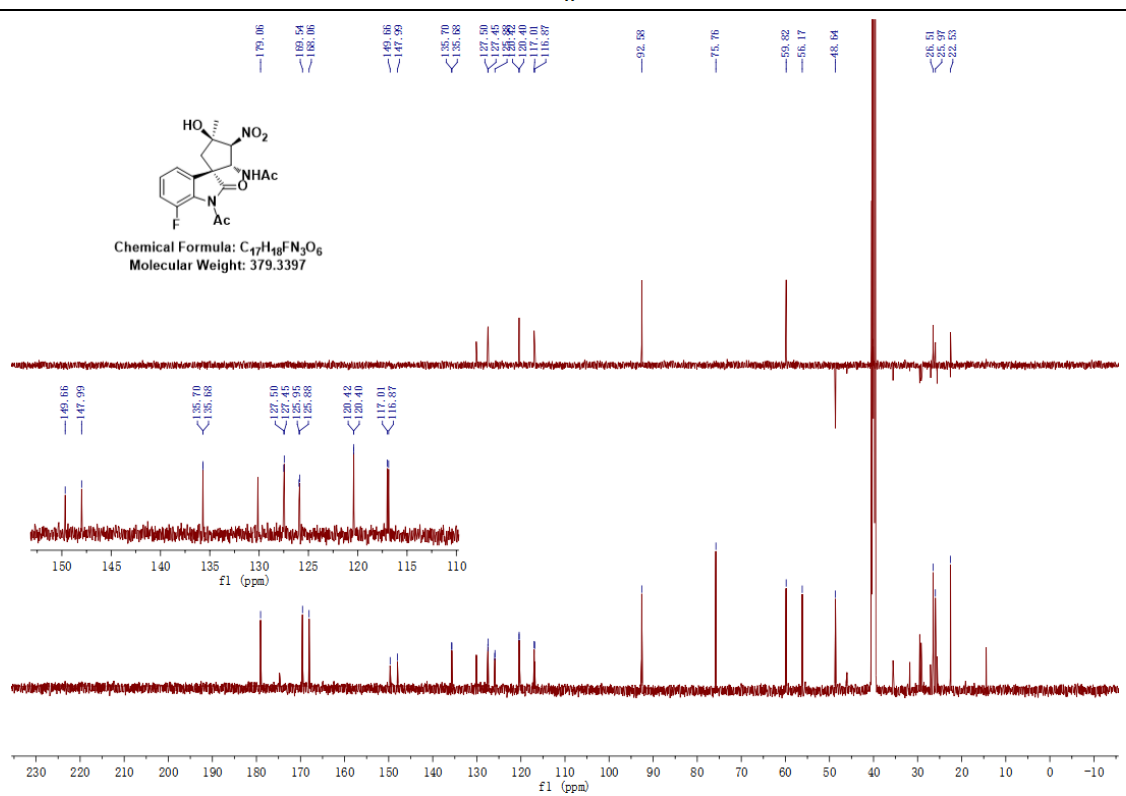

### (C) HPLC spectra

(1*S*,2*R*,3*S*,4*R*)-*tert*-Butyl-2-acetamido-4-hydroxy-4-methyl-3-nitro-2'-oxospiro[cyclopentane-1,3'-indoline]-1'-carboxylate (**3a**)

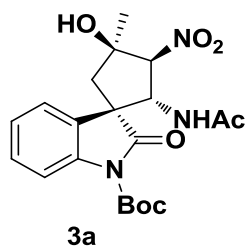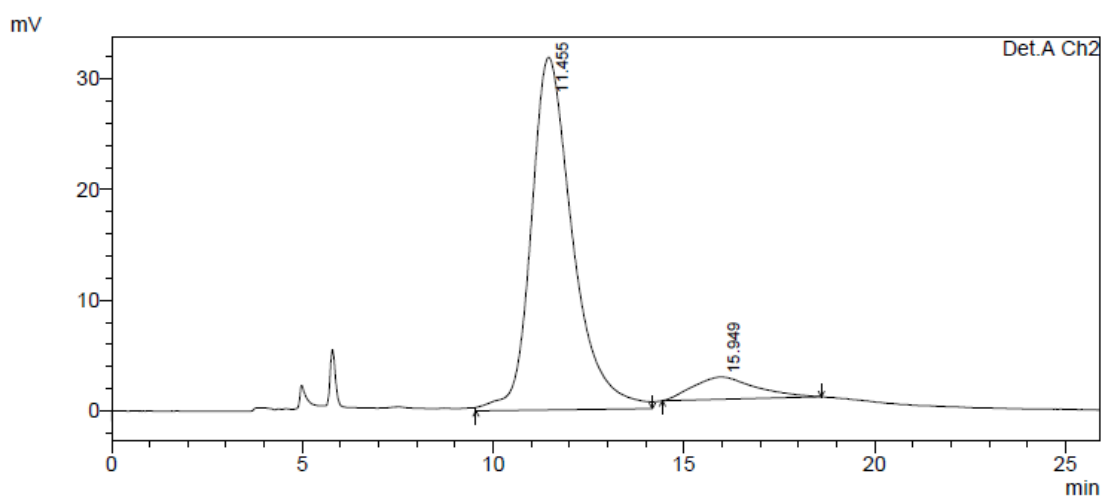

| Peak# | Ret. Time | Area    | Height | Area %  | Height % |
|-------|-----------|---------|--------|---------|----------|
| 1     | 11.455    | 2416331 | 31859  | 91.344  | 94.060   |
| 2     | 15.949    | 228966  | 2012   | 8.656   | 5.940    |
| Total |           | 2645296 | 33871  | 100.000 | 100.000  |

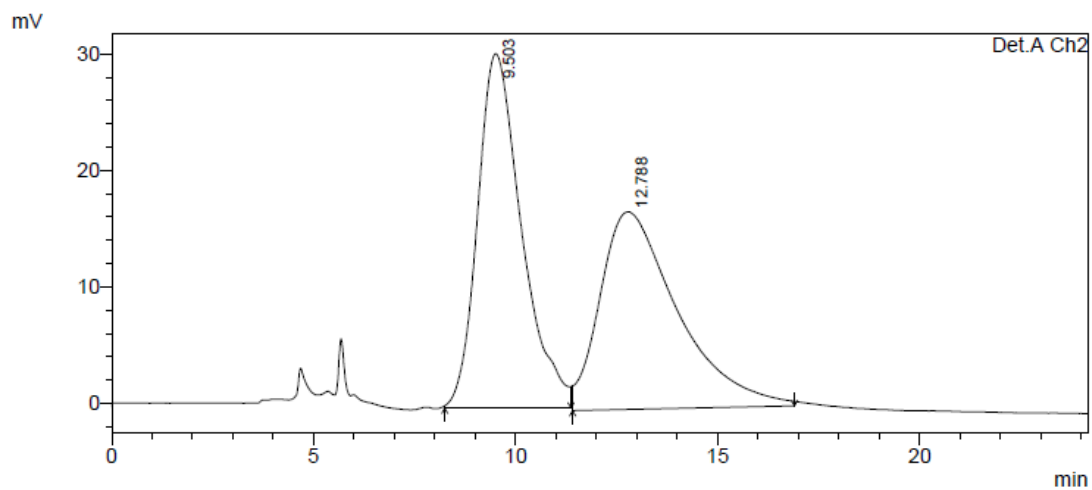

| Peak# | Ret. Time | Area    | Height | Area %  | Height % |
|-------|-----------|---------|--------|---------|----------|
| 1     | 9.503     | 2305699 | 30443  | 50.467  | 64.217   |
| 2     | 12.788    | 2263049 | 16964  | 49.533  | 35.783   |
| Total |           | 4568748 | 47407  | 100.000 | 100.000  |

(1*S*,2*R*,3*S*,4*R*)-*tert*-Butyl-2-acetamido-4-hydroxy-4,5'-dimethyl-3-nitro-2'-oxospiro-[cyclopentane-1,3'-indoline]-1'-carboxylate (**3b**)

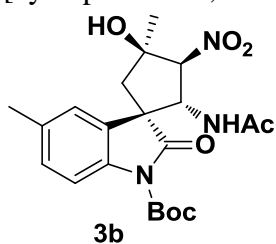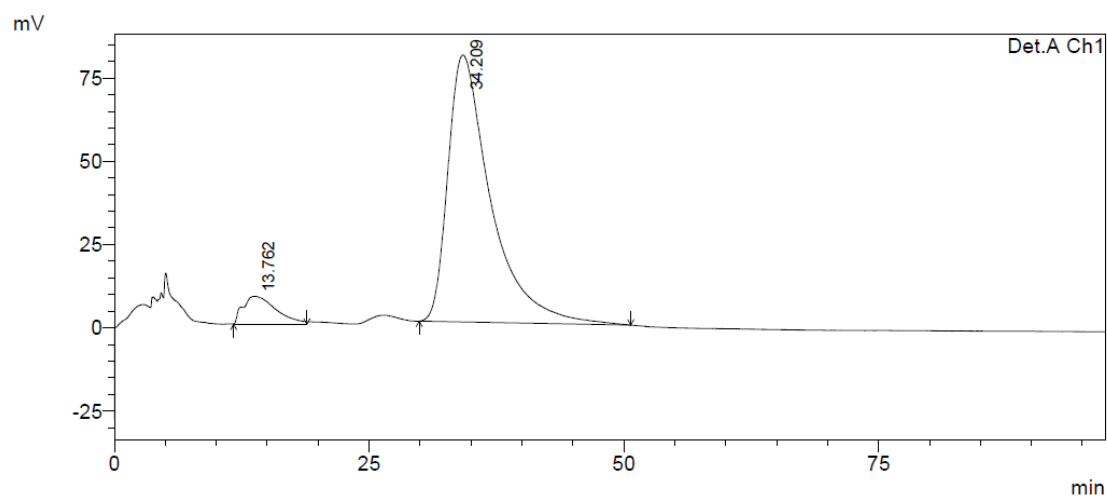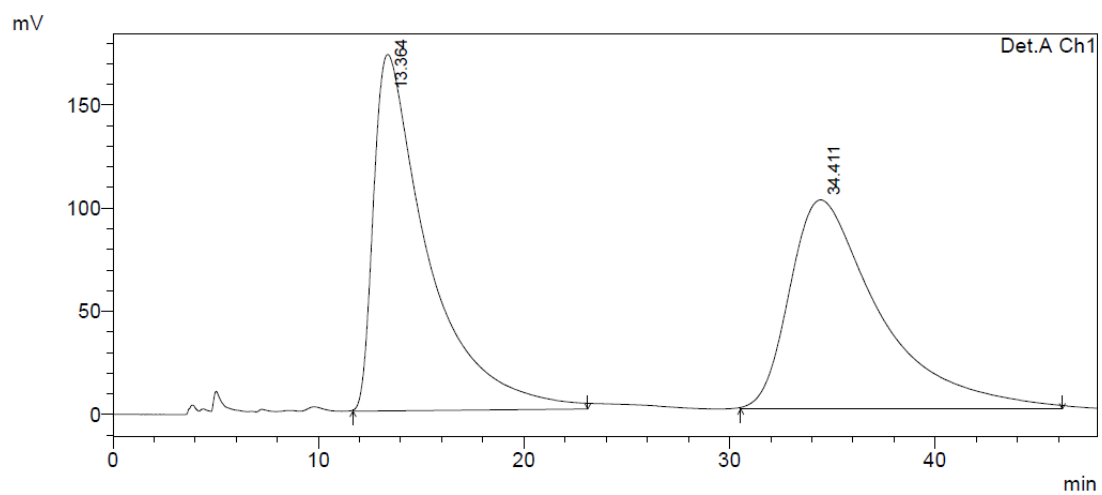

(1*S*,2*R*,3*S*,4*R*)-*tert*-Butyl-2-acetamido-4-hydroxy-4,5,7'-trimethyl-3-nitro-2'-oxospiro[cyclopentane-1,3'-indoline]-1'-carboxylate (**3c**)

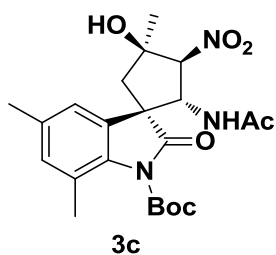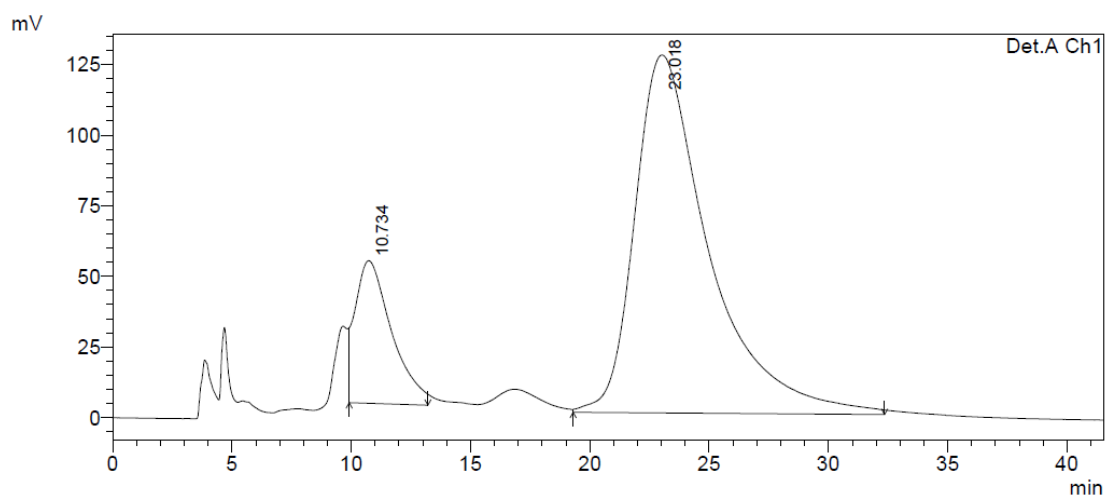

| Peak# | Ret. Time | Area     | Height | Area %  | Height % |
|-------|-----------|----------|--------|---------|----------|
| 1     | 10.734    | 5340200  | 50464  | 16.301  | 28.482   |
| 2     | 23.018    | 27420267 | 126711 | 83.699  | 71.518   |
| Total |           | 32760466 | 177175 | 100.000 | 100.000  |

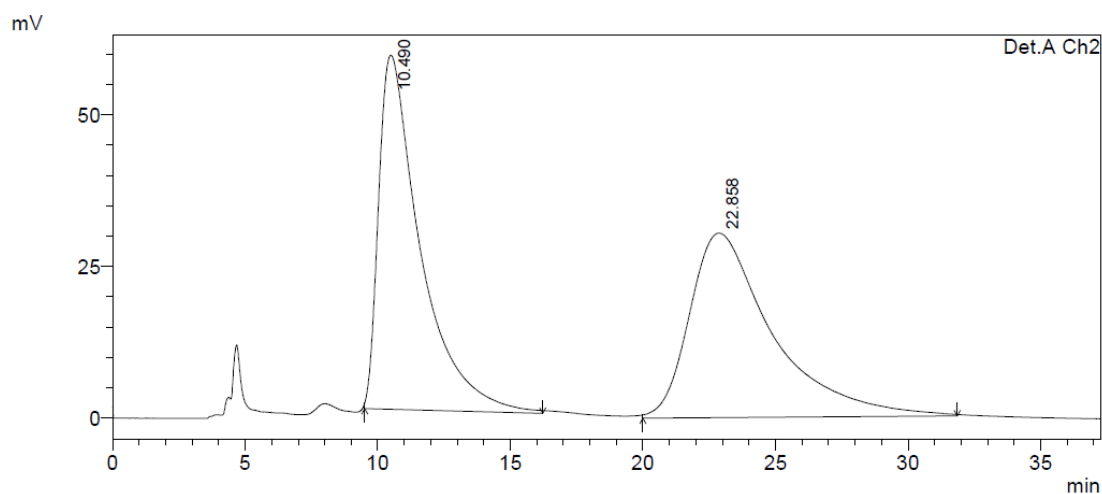

| Peak# | Ret. Time | Area     | Height | Area %  | Height % |
|-------|-----------|----------|--------|---------|----------|
| 1     | 10.490    | 6380640  | 58387  | 49.090  | 65.753   |
| 2     | 22.858    | 6617080  | 30410  | 50.910  | 34.247   |
| Total |           | 12997719 | 88797  | 100.000 | 100.000  |

(1*S*,2*R*,3*S*,4*R*)-*tert*-Butyl-2-acetamido-4-hydroxy-5'-methoxy-4-methyl-3-nitro-2'-oxo spiro[cyclopentane-1,3'-indoline]-1'-carboxylate (**3d**)

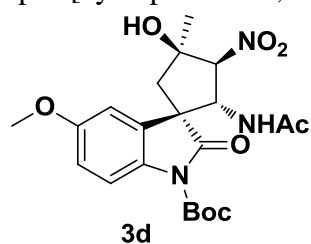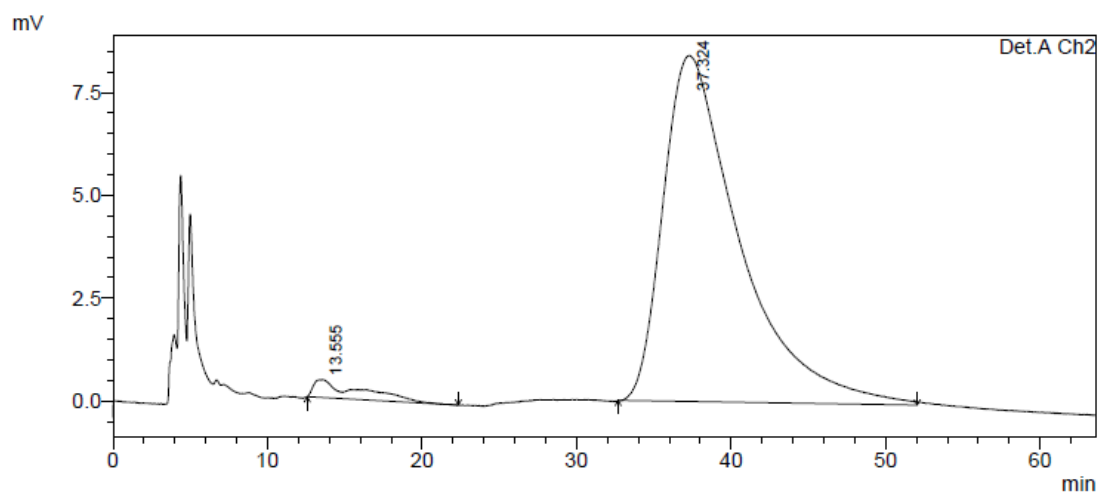

| Peak# | Ret. Time | Area    | Height | Area %  | Height % |
|-------|-----------|---------|--------|---------|----------|
| 1     | 13.555    | 93120   | 439    | 3.120   | 4.961    |
| 2     | 37.324    | 2891125 | 8405   | 96.880  | 95.039   |
| Total |           | 2984245 | 8843   | 100.000 | 100.000  |

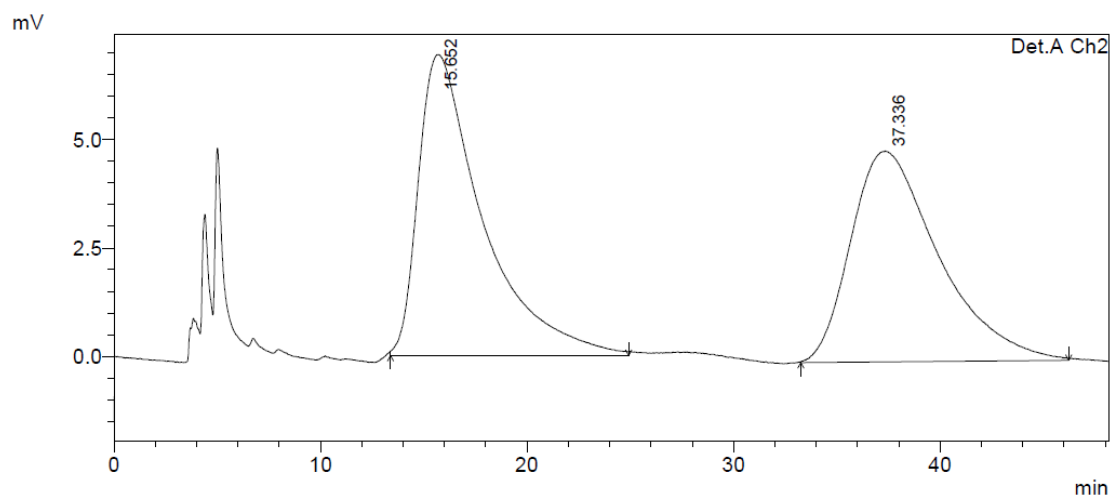

| Peak# | Ret. Time | Area    | Height | Area %  | Height % |
|-------|-----------|---------|--------|---------|----------|
| 1     | 15.652    | 1498311 | 6936   | 51.069  | 58.774   |
| 2     | 37.336    | 1435606 | 4865   | 48.931  | 41.226   |
| Total |           | 2933916 | 11802  | 100.000 | 100.000  |

(1*S*,2*R*,3*S*,4*R*)-*tert*-Butyl-2-acetamido-4-hydroxy-5'-trifluoromethoxy-4-methyl-3-nitro-2'-oxospiro[cyclopentane-1,3'-indoline]-1'-carboxylate (**3e**)

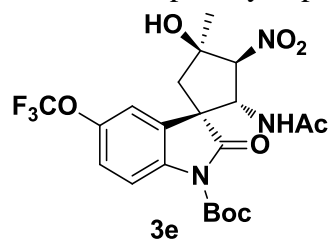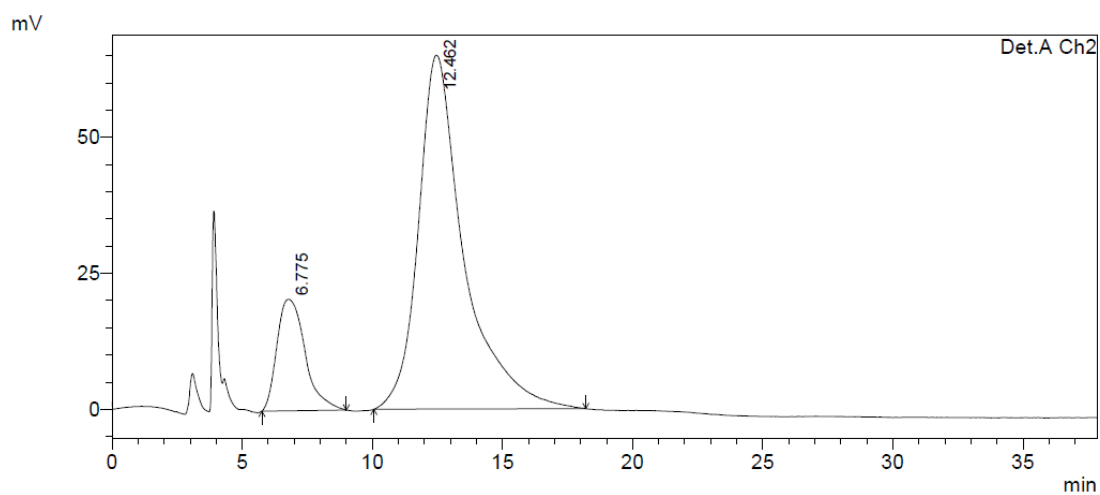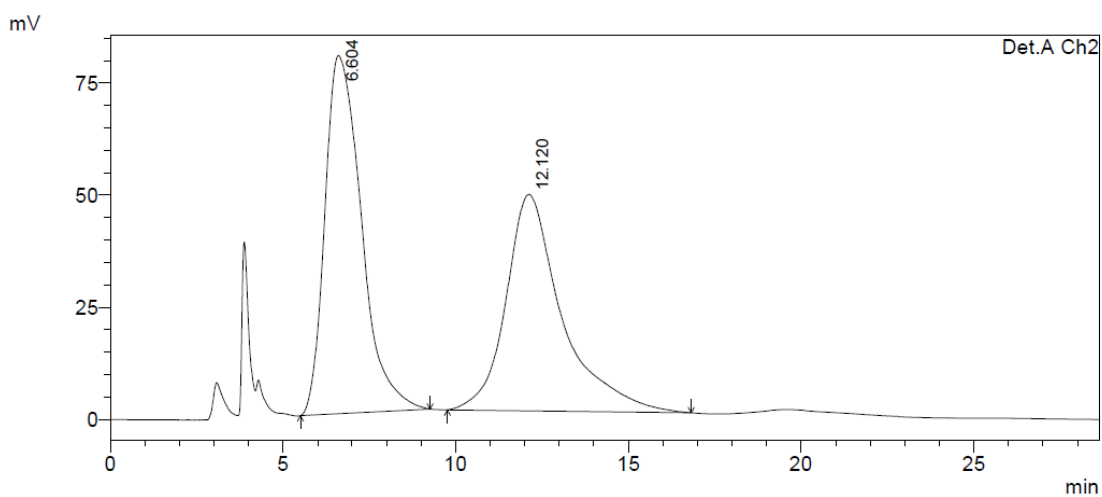

(1*S*,2*R*,3*S*,4*R*)-*tert*-Butyl-2-acetamido-4-hydroxy-5'-fluoro-4-methyl-3-nitro-2'-oxo-spiro[cyclopentane-1,3'-indoline]-1'-carboxylate (**3f**)

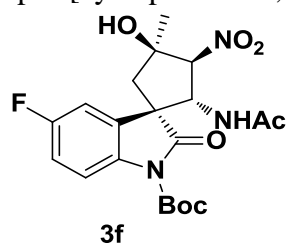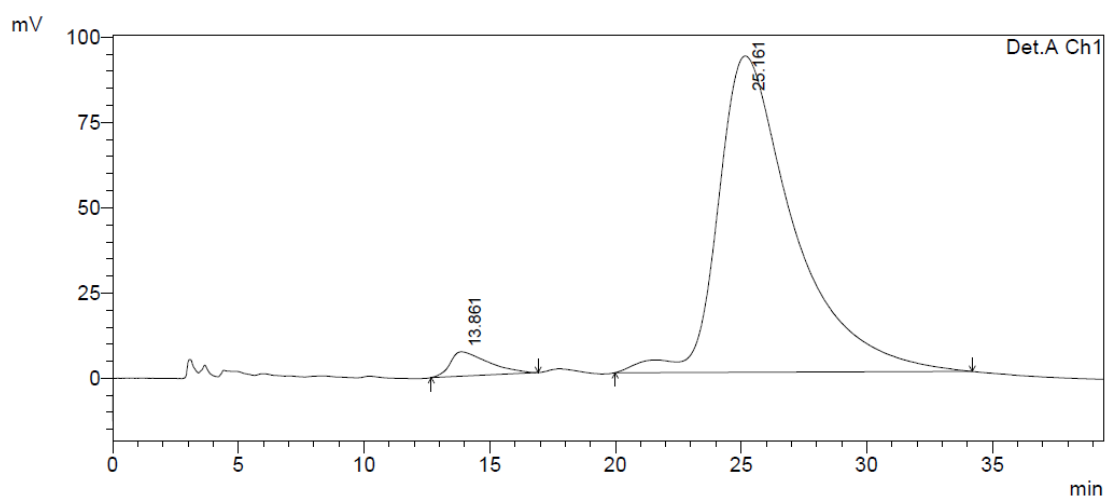

| Peak# | Ret. Time | Area     | Height | Area %  | Height % |
|-------|-----------|----------|--------|---------|----------|
| 1     | 13.861    | 748876   | 7169   | 3.710   | 7.180    |
| 2     | 25.161    | 19436829 | 92687  | 96.290  | 92.820   |
| Total |           | 20185705 | 99856  | 100.000 | 100.000  |

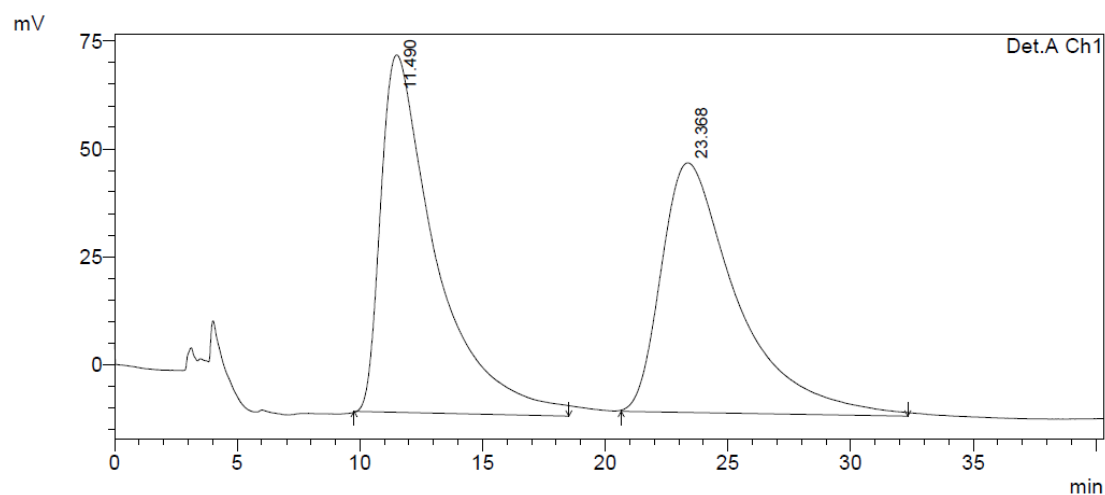

| Peak# | Ret. Time | Area     | Height | Area %  | Height % |
|-------|-----------|----------|--------|---------|----------|
| 1     | 11.490    | 12910112 | 82888  | 50.931  | 58.880   |
| 2     | 23.368    | 12438224 | 57887  | 49.069  | 41.120   |
| Total |           | 25348336 | 140774 | 100.000 | 100.000  |



(1*S*,2*R*,3*S*,4*R*)-*tert*-Butyl-2-acetamido-4-hydroxy-5'-chloro-4-methyl-3-nitro-2'-oxo-spiro[cyclopentane-1,3'-indoline]-1'-carboxylate (**3g**)

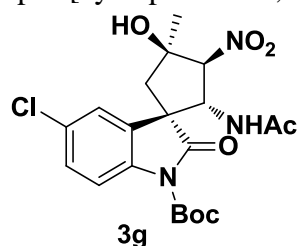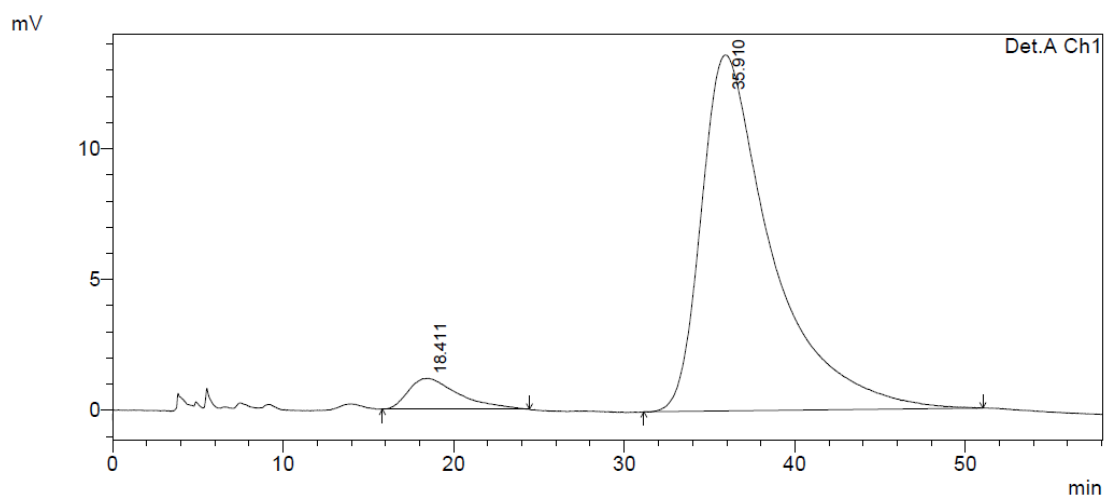

| Peak# | Ret. Time | Area    | Height | Area %  | Height % |
|-------|-----------|---------|--------|---------|----------|
| 1     | 18.411    | 242954  | 1182   | 5.861   | 7.987    |
| 2     | 35.910    | 3902408 | 13617  | 94.139  | 92.013   |
| Total |           | 4145362 | 14799  | 100.000 | 100.000  |

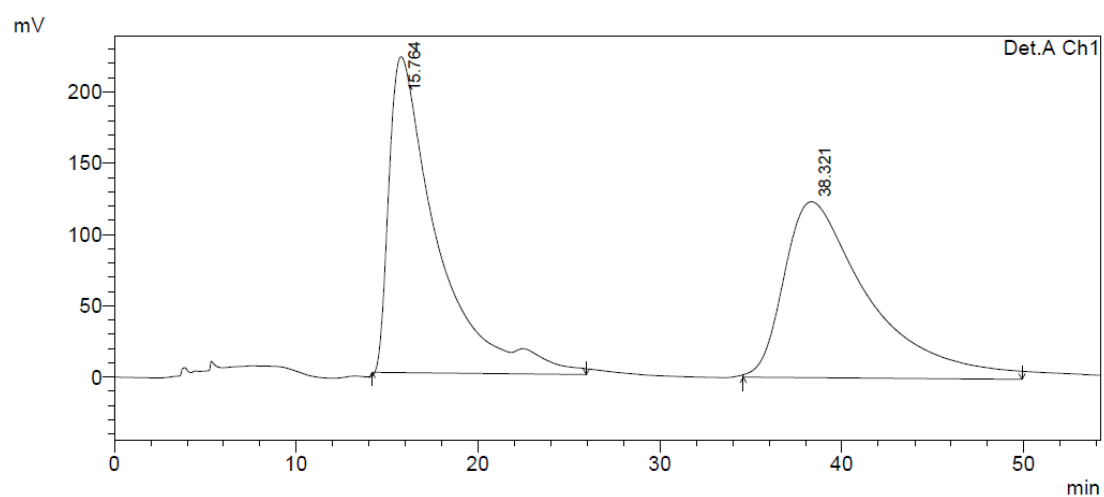

| Peak# | Ret. Time | Area     | Height | Area %  | Height % |
|-------|-----------|----------|--------|---------|----------|
| 1     | 15.764    | 40805467 | 221593 | 50.435  | 64.239   |
| 2     | 38.321    | 40101122 | 123358 | 49.565  | 35.761   |
| Total |           | 80906590 | 344951 | 100.000 | 100.000  |

(1*S*,2*R*,3*S*,4*R*)-*tert*-Butyl-2-acetamido-4-hydroxy-7'-fluoro-4-methyl-3-nitro-2'-oxo-spiro[cyclopentane-1,3'-indoline]-1'-carboxylate (**3h**)

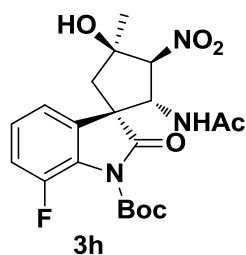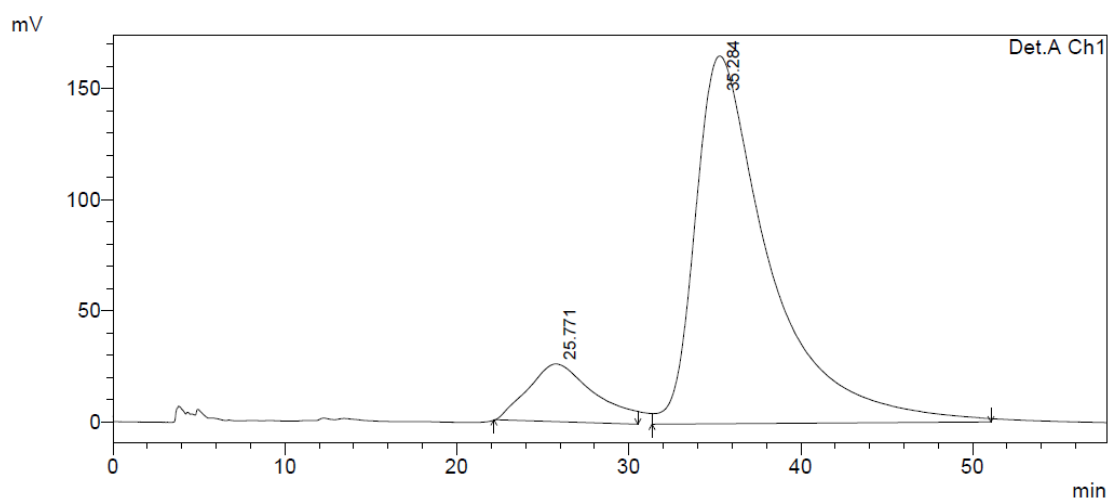

| Peak# | Ret. Time | Area     | Height | Area %  | Height % |
|-------|-----------|----------|--------|---------|----------|
| 1     | 25.771    | 6939855  | 25940  | 12.222  | 13.544   |
| 2     | 35.284    | 49841992 | 165586 | 87.778  | 86.456   |
| Total |           | 56781846 | 191526 | 100.000 | 100.000  |

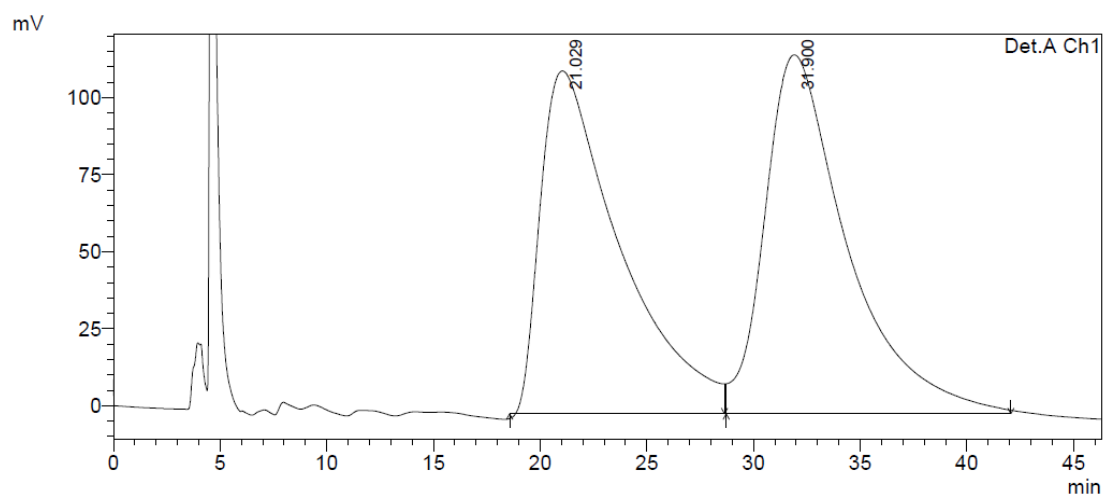

| Peak# | Ret. Time | Area     | Height | Area %  | Height % |
|-------|-----------|----------|--------|---------|----------|
| 1     | 21.029    | 28809251 | 111285 | 47.879  | 48.852   |
| 2     | 31.900    | 31361384 | 116516 | 52.121  | 51.148   |
| Total |           | 60170635 | 227801 | 100.000 | 100.000  |

(1*S*,2*R*,3*S*,4*R*)-*tert*-Butyl-2-acetamido-4-hydroxy-6'-chloro-4-methyl-3-nitro-2'-oxo-spiro[cyclopentane-1,3'-indoline]-1'-carboxylate (**3i**)

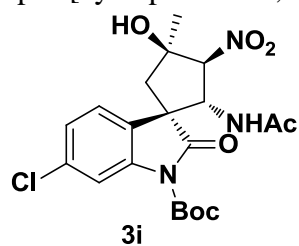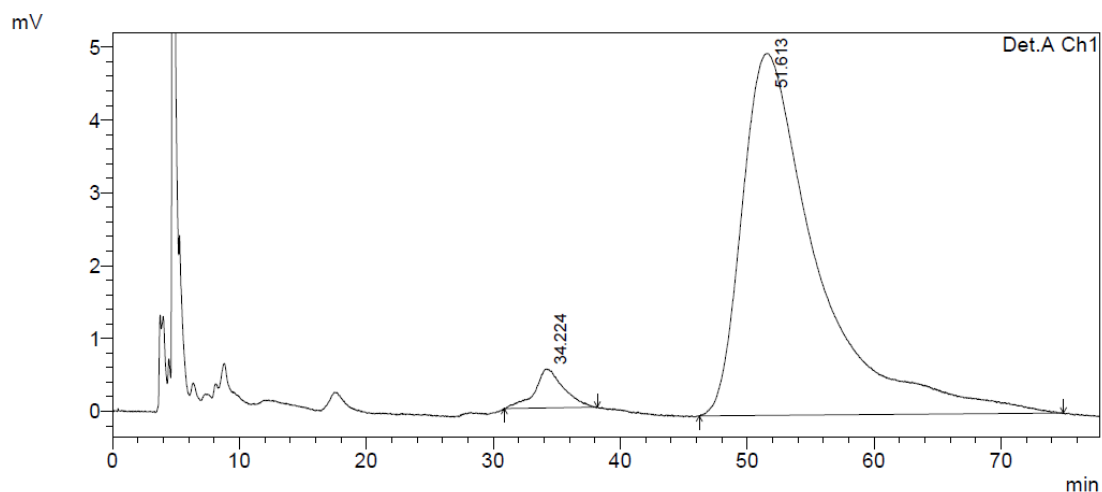

| Peak# | Ret. Time | Area    | Height | Area %  | Height % |
|-------|-----------|---------|--------|---------|----------|
| 1     | 34.224    | 84934   | 534    | 3.971   | 9.707    |
| 2     | 51.613    | 2053697 | 4968   | 96.029  | 90.293   |
| Total |           | 2138631 | 5503   | 100.000 | 100.000  |

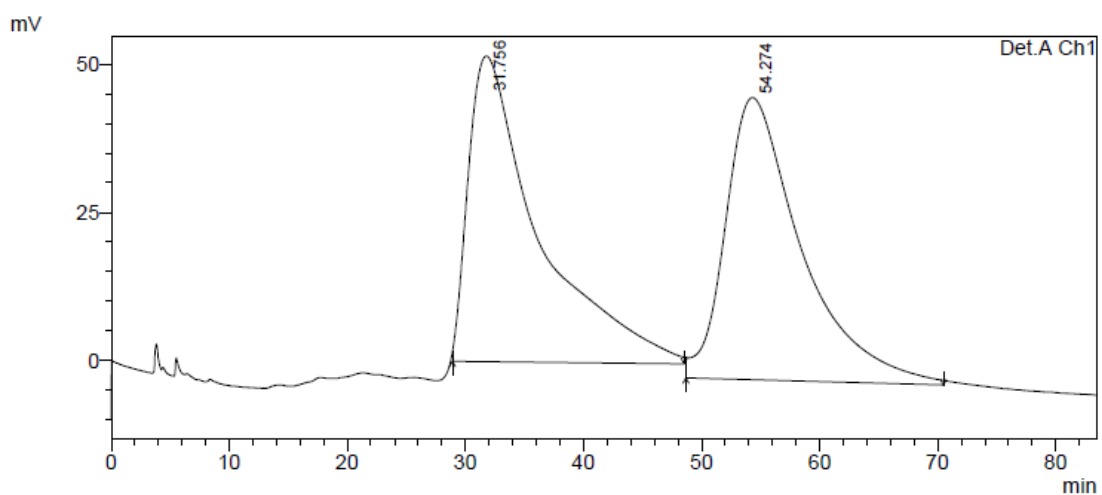

| Peak# | Ret. Time | Area     | Height | Area %  | Height % |
|-------|-----------|----------|--------|---------|----------|
| 1     | 31.756    | 21228636 | 51556  | 49.904  | 52.020   |
| 2     | 54.274    | 21310440 | 47552  | 50.096  | 47.980   |
| Total |           | 42539076 | 99108  | 100.000 | 100.000  |

(1*S*,2*R*,3*S*,4*R*)-*tert*-Butyl-2-acetamido-4-hydroxy-6'-bromo-4-methyl-3-nitro-2'-oxo-spiro[cyclopentane-1,3'-indoline]-1'-carboxylate (**3j**)

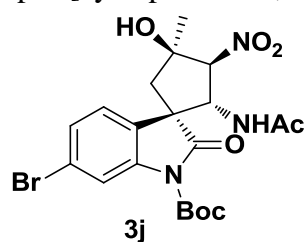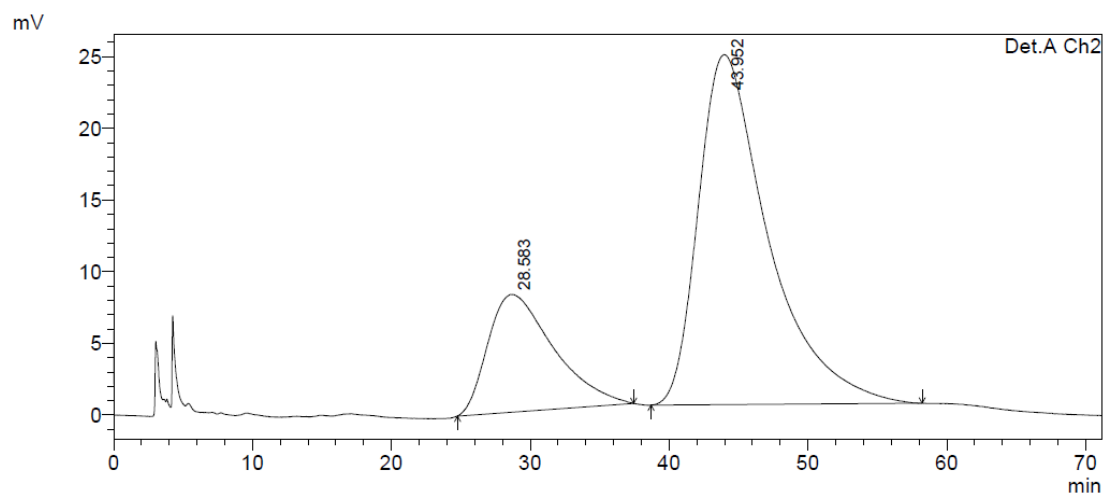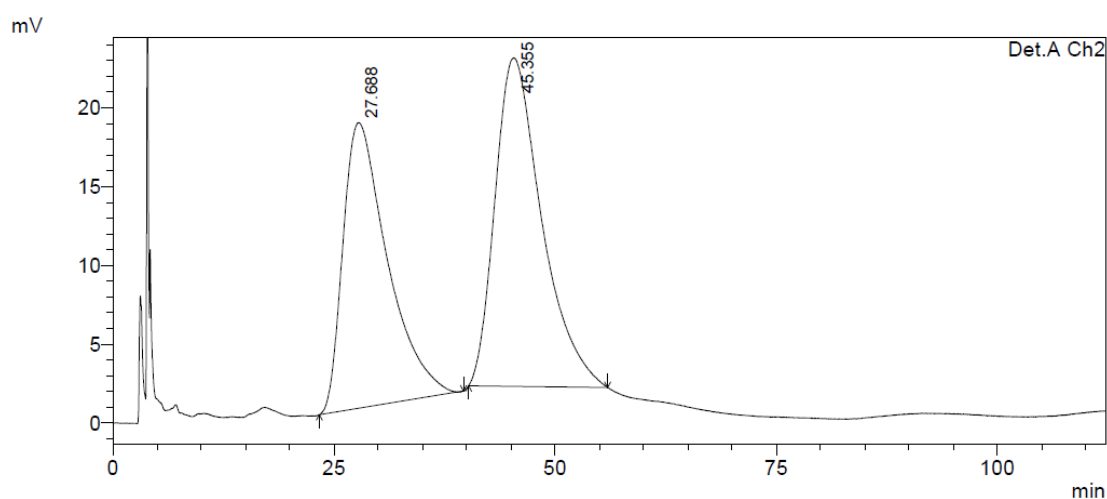

*N*-((1*S*,2*R*,3*S*,4*R*)-1'-Acetyl-3-hydroxy-3-methyl-4-nitro-2'-oxospiro[cyclopentane-1,3'-indolin]-5-yl)acetamide (**3k**)

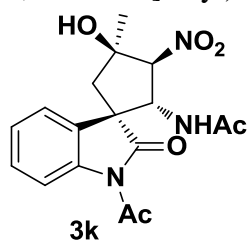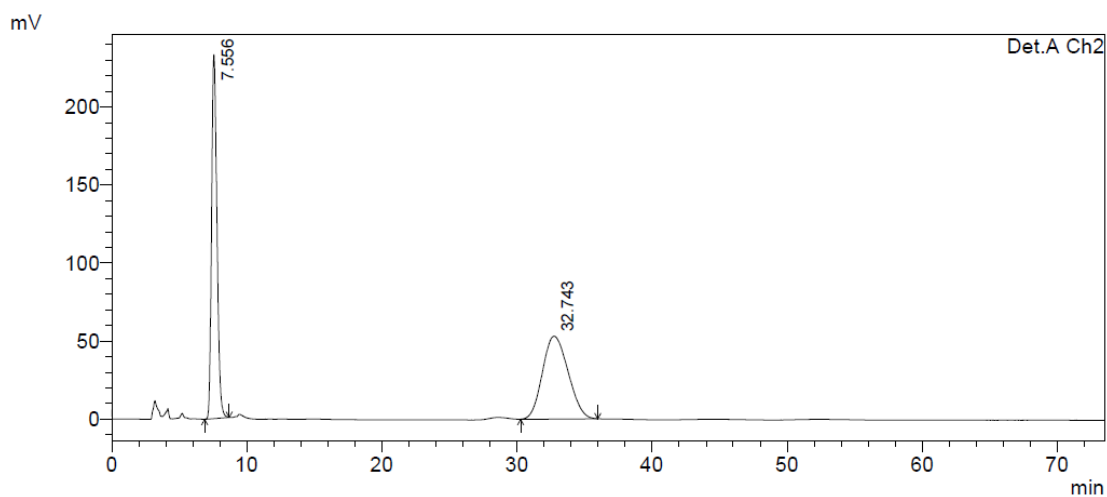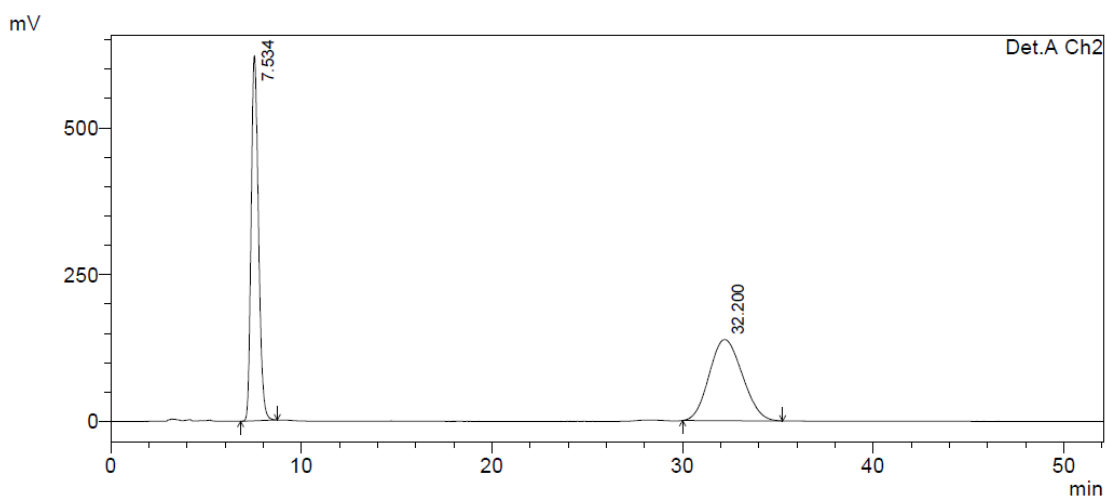

*N*-((1*S*,2*R*,3*S*,4*R*)-1'-Acetyl-3-hydroxy-3,5'-dimethyl-4-nitro-2'-oxospiro[cyclopentane-1,3'-indolin]-5-yl)acetamide (**3I**)

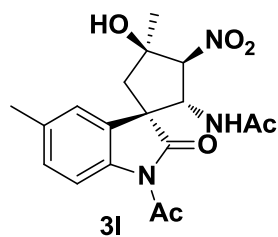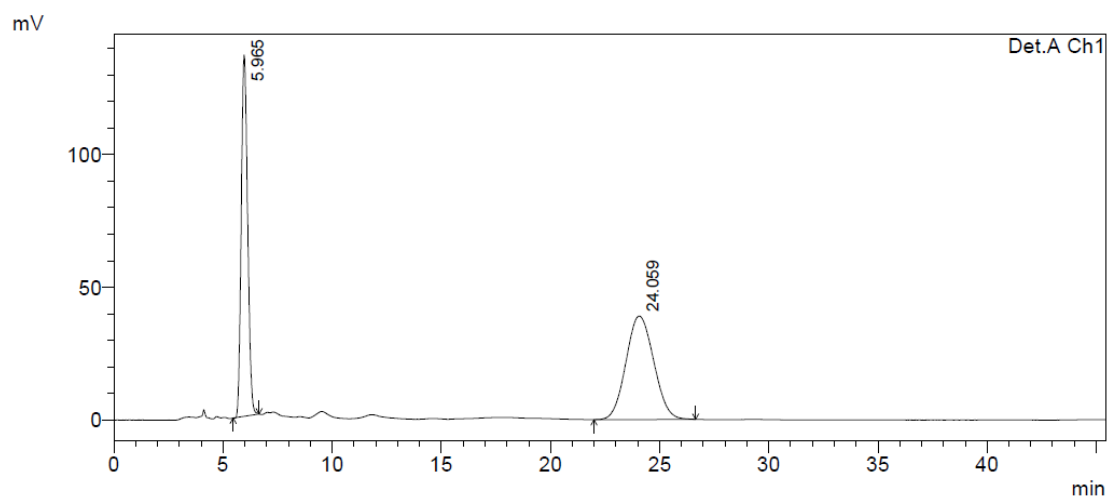

| Peak# | Ret. Time | Area    | Height | Area %  | Height % |
|-------|-----------|---------|--------|---------|----------|
| 1     | 5.965     | 2756362 | 136055 | 44.462  | 77.751   |
| 2     | 24.059    | 3442964 | 38933  | 55.538  | 22.249   |
| Total |           | 6199326 | 174988 | 100.000 | 100.000  |

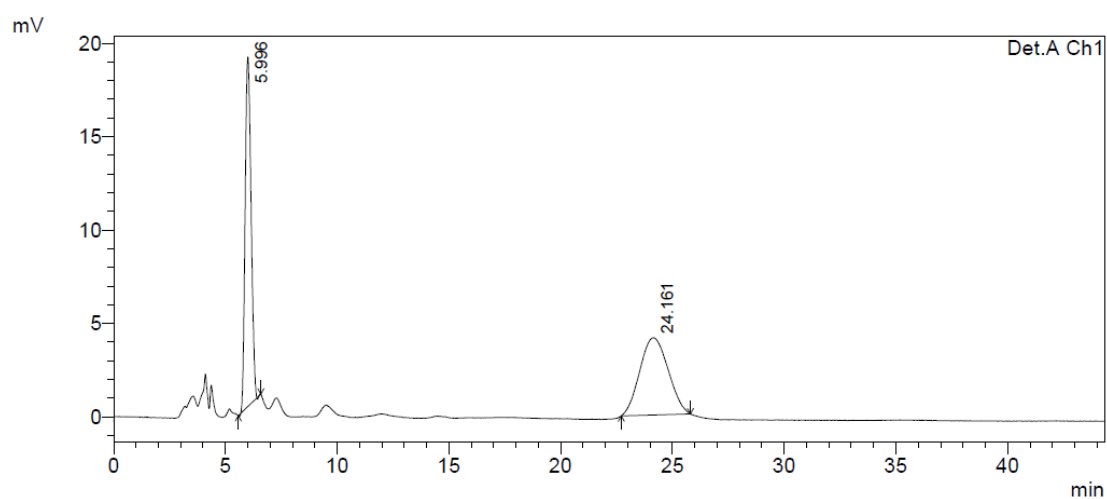

| Peak# | Ret. Time | Area   | Height | Area %  | Height % |
|-------|-----------|--------|--------|---------|----------|
| 1     | 5.996     | 347747 | 18724  | 48.831  | 81.914   |
| 2     | 24.161    | 364400 | 4134   | 51.169  | 18.086   |
| Total |           | 712146 | 22858  | 100.000 | 100.000  |

*N*-((1*S*,2*R*,3*S*,4*R*)-1'-Acetyl-3-hydroxy-5'-methoxy-3-methyl-4-nitro-2'-oxospiro-[cyclopentane-1,3'-indolin]-5-yl)acetamide (**3m**)

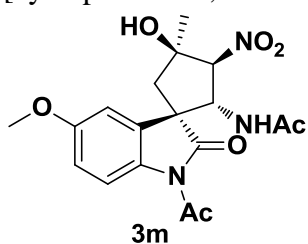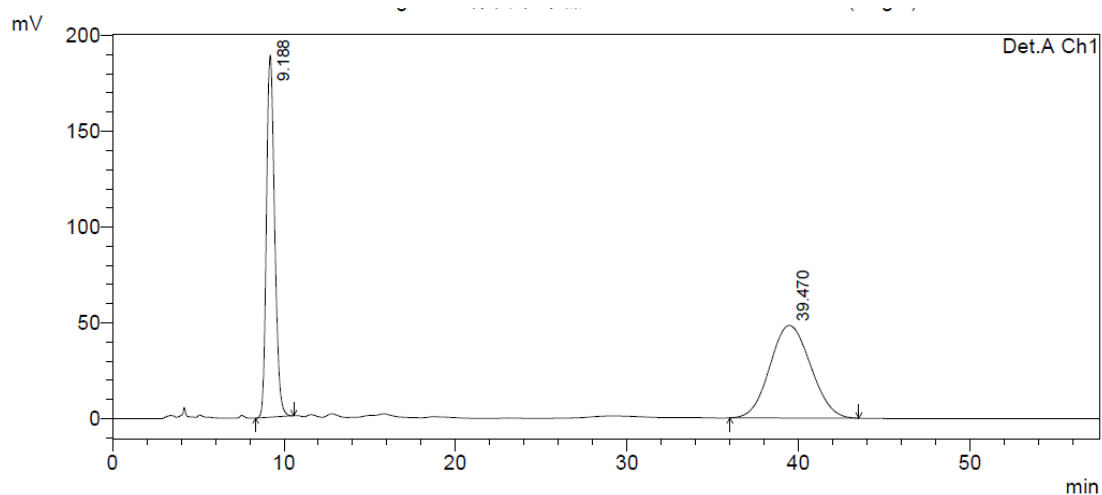

| Peak# | Ret. Time | Area     | Height | Area %  | Height % |
|-------|-----------|----------|--------|---------|----------|
| 1     | 9.188     | 6277956  | 189080 | 43.983  | 79.645   |
| 2     | 39.470    | 7995643  | 48323  | 56.017  | 20.355   |
| Total |           | 14273598 | 237404 | 100.000 | 100.000  |

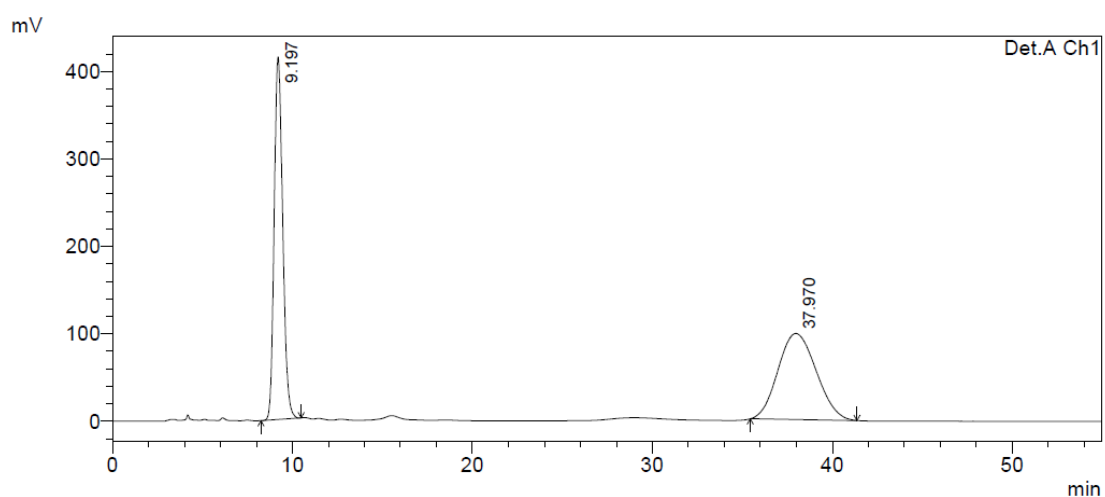

| Peak# | Ret. Time | Area     | Height | Area %  | Height % |
|-------|-----------|----------|--------|---------|----------|
| 1     | 9.197     | 13690622 | 414836 | 48.476  | 80.826   |
| 2     | 37.970    | 14551504 | 98412  | 51.524  | 19.174   |
| Total |           | 28242126 | 513249 | 100.000 | 100.000  |

*N*-((1*S*,2*R*,3*S*,4*R*)-1'-Acetyl-5'-fluoro-3-hydroxy-3-methyl-4-nitro-2'-oxospiro[cyclopentane-1,3'-indolin]-5-yl)acetamide (**3n**)

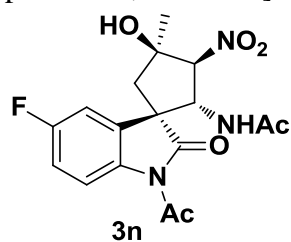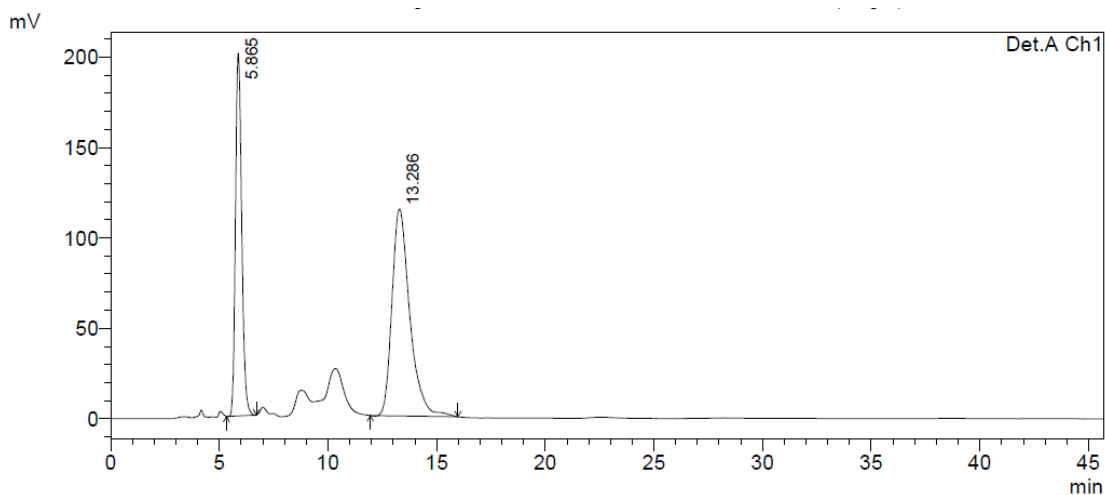

| Peak# | Ret. Time | Area     | Height | Area %  | Height % |
|-------|-----------|----------|--------|---------|----------|
| 1     | 5.865     | 4006835  | 200622 | 38.108  | 63.676   |
| 2     | 13.286    | 6507453  | 114446 | 61.892  | 36.324   |
| Total |           | 10514289 | 315068 | 100.000 | 100.000  |

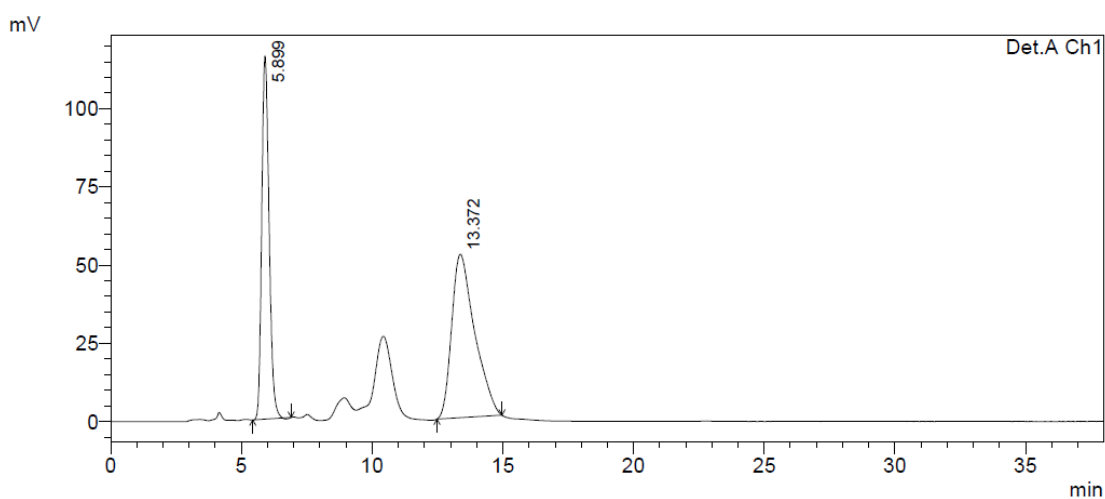

| Peak# | Ret. Time | Area    | Height | Area %  | Height % |
|-------|-----------|---------|--------|---------|----------|
| 1     | 5.899     | 2264185 | 116089 | 41.482  | 68.977   |
| 2     | 13.372    | 3194090 | 52211  | 58.518  | 31.023   |
| Total |           | 5458275 | 168299 | 100.000 | 100.000  |



*N*-((1*S*,2*R*,3*S*,4*R*)-1'-Acetyl-7'-fluoro-3-hydroxy-3-methyl-4-nitro-2'-oxospiro[cyclopentane-1,3'-indolin]-5-yl)acetamide (**3o**)

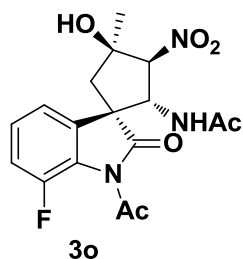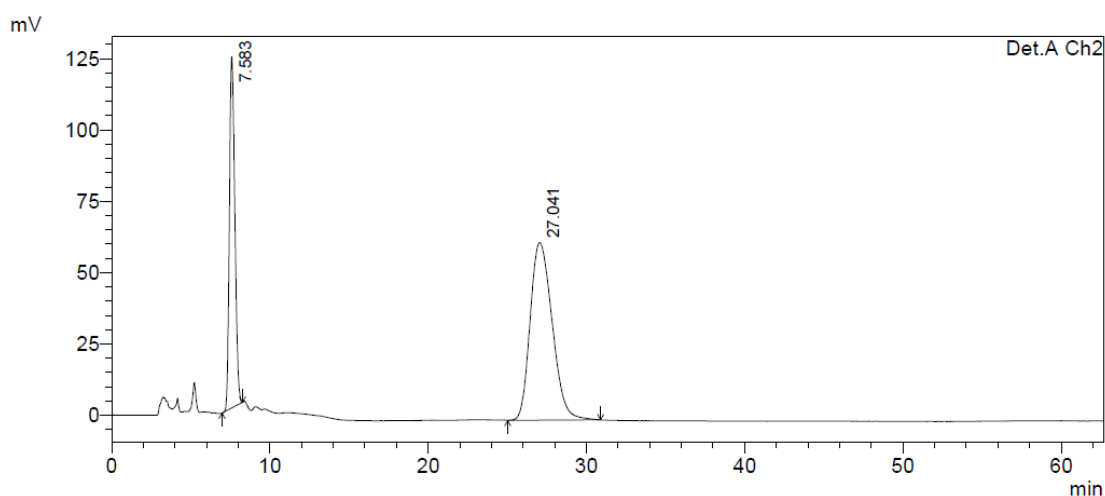

| Peak# | Ret. Time | Area    | Height | Area %  | Height % |
|-------|-----------|---------|--------|---------|----------|
| 1     | 7.583     | 2952491 | 123258 | 32.879  | 66.446   |
| 2     | 27.041    | 6027459 | 62242  | 67.121  | 33.554   |
| Total |           | 8979950 | 185500 | 100.000 | 100.000  |

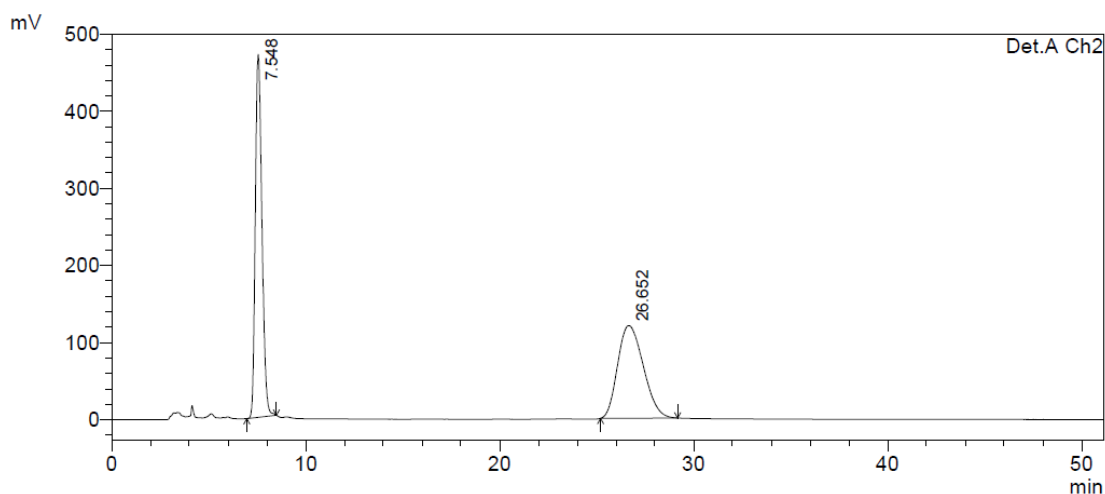

| Peak# | Ret. Time | Area     | Height | Area %  | Height % |
|-------|-----------|----------|--------|---------|----------|
| 1     | 7.548     | 11217831 | 470609 | 50.364  | 79.647   |
| 2     | 26.652    | 11055880 | 120258 | 49.636  | 20.353   |
| Total |           | 22273712 | 590867 | 100.000 | 100.000  |

## (D) X-ray Data

**Figure S1:** X-ray Structure of compound **3g**.

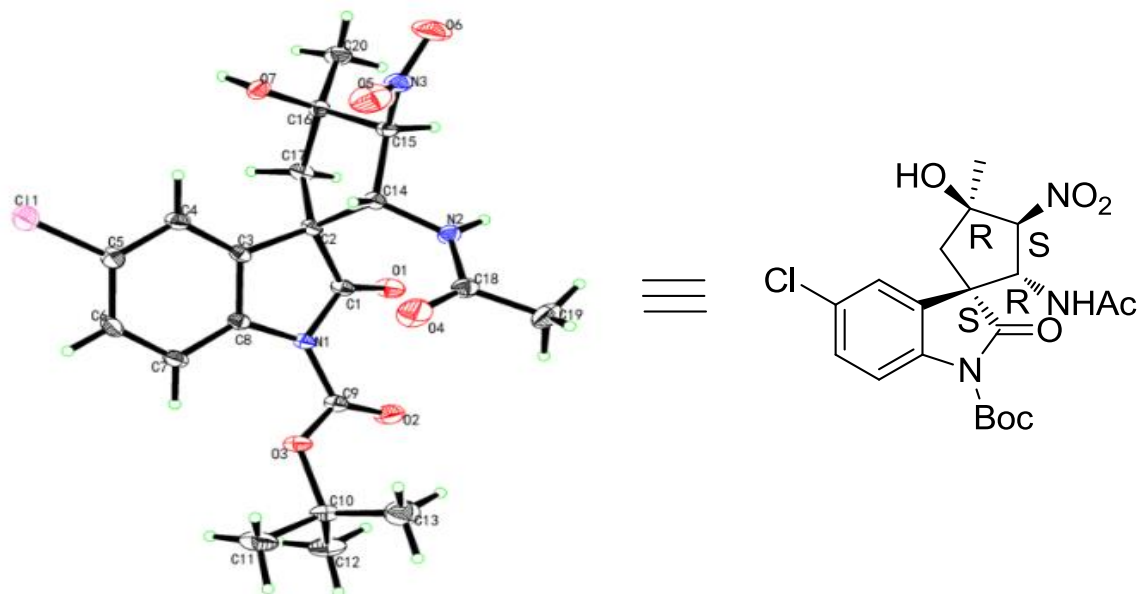

The (1*S*,2*R*,3*S*,4*R*)-configuration of **3g** was determined by the X-ray analysis of its crystal. The structure was solved and refined using the Bruker SHELXTL Software Package. X-ray crystallographic data of (1*S*,2*R*,3*S*,4*R*)-**3g** were collected at  $T = 296$  K:  $C_{20}H_{24}ClN_3O_7$ ,  $M_r = 453.87$ . Space group:  $P2_12_12_1$ ,  $a = 9.7678$  (9) Å,  $b = 14.5518$  (14) Å,  $c = 15.4811$  (15) Å,  $\alpha = 90^\circ$ ,  $\beta = 90^\circ$ ,  $\gamma = 90^\circ$ ,  $V = 2200.5$  (4) Å<sup>3</sup>,  $Z = 4$ .

CCDC 1532974 (**3g**) contains the supplementary crystallographic data for this paper.

These data can be obtained free of charge from the Cambridge Crystallographic Data

Centre via [www.ccdc.cam.ac.uk/data\\_request/cif](http://www.ccdc.cam.ac.uk/data_request/cif).
